# Supplementary material for: Phenotypic impact of individual conserved neuronal microexons and their master regulators in zebrafish
Source: eLife. 2025 Nov 18;13:RP104275. doi: 10.7554/eLife.104275 (PMC12626424; doi:10.7554/eLife.104275)
Supplement: Source data 1. [file elife-104275-data1.xlsx]

## Sheet: 1A
GENE-EVENT	Neural	PancreasEndo	Muscle	ImmuneHemato	Testis	Ovary	Adipose	Epidermis	Gills	Intestine	Kidney	Liver	PancreasExo
ATL2-DreEX0000709	95.19	81.55	7.03	9.37	5.2	0	0	NA	0	0	0	11.56	0
ATP11B-DreEX0000717	76.27	3.32	9.11	0	0.26	1.94	3.22	0	0	0	0.51	0	0
CABZ01084323.1-DreEX0002175	95.79	90.14	1.77	17.28	1.86	NA	0	NA	18.97	3.91	1.78	0	0
CENPF (2 of 2)-DreEX0002642	47.99	0	19.49	0	0	0	0	0	0	0	0	0	0
DAB2-DreEX0003483	51.73	53.44	0.46	0	0	NA	0	0	0	0	0	0	NA
ERC1 (3 of 3)-DreEX0004027	89.08	8.95	3.2	0	0	NA	0	0	0	NA	0	NA	0
GK2-DreEX0004728	59.92	23.92	18.24	5.55	14.57	0	3.87	0	0	1.36	0	8.1	0
RUNDC1-DreEX0007654	93.08	30.18	14.39	7.2	5.4	0	6.63	NA	0	0	0	0	NA
SCYL2-DreEX0007764	90.93	82.52	0	0	0	0	0	0	0	0	0	0	0
SNX2-DreEX0008261	61.22	51.71	10.11	6.95	0	2.99	0	0	1.73	0	1.11	0	0
TACC2-DreEX0008613	93.56	9.34	0.85	0	2.07	NA	0	0	0	0	0	NA	0
TNKS (1 of 2)-DreEX0008971	92.48	7.58	75.7	23.37	7.33	30.73	9.43	11.63	21.81	16.28	24.75	6.17	1.89
abi1a-DreEX0010301	88.43	71.24	0.8	30.82	2.94	0	1.42	0	0.47	0	0	0	0
abi2a-DreEX0010320	68.59	22	0	0	23.85	0	9.73	0	3.49	4.35	0	0	18.16
abi2b-DreEX0010329	88.57	95.22	0	1.37	0.52	0	0	0	1.11	2.86	0	0	0
acot7-DreEX0010726	94.68	11.86	6.92	0	0	NA	8.43	0	1.55	0	0	0	0
acvr2aa-DreEX0011037	26.55	0	0	0.98	0	0	0	0	0	0	0.49	0	0
agrn-DreEX0012142	90.35	0	0.47	1.6	0	NA	0	0	0	0	0	0	NA
ap1b1-DreEX0013673	33.99	0	1.63	3.73	0	0	0	0	0.7	0	0.36	2.02	0
ap1g1-DreEX0013683	76.36	3.92	2.26	9.37	0	0	0.91	0	0	0.99	1.29	0	0
ap2a1-DreEX0013723	30.89	1.09	0	0.67	0	0	0	0	0	0	0	0	0
ap2m1a-DreEX0013740	41.38	30.13	0.75	0.51	0.27	0	0.74	0	0.18	0	0.1	0	0
apbb1-DreEX0013846	93.56	99.45	1.18	12.59	4.88	0	0	0	5.38	0	0	0	8.04
apbb2b-DreEX0013859	94.65	96.87	2.54	14.38	4.29	NA	5.7	NA	6.3	7.96	0	0	7.03
arhgef1b-DreEX0014527	39.36	7	0	0.12	0	0	0	0	0	0	0	0	0
asap1b-DreEX0015073	93.81	87.14	4.34	3.87	0.82	0	4.45	NA	0	0	0	NA	0
aspg-DreEX0015304	68.51	13.76	1.6	1.27	0	0	0	NA	2.1	0	0.26	0	0
aspg-DreEX0015305	74.82	13.12	52.47	1.09	0	0	1.72	NA	13	4.9	0.44	0	0
atxn2-DreEX0016233	67.92	10.38	24.12	26.38	0.77	5.28	5.2	16.58	23.26	7.36	11.96	19.26	7.54
bcam-DreEX0016717	87.16	17.39	2.07	14.97	0	NA	0	0	0	NA	0	NA	0
cadps2-DreEX0018370	97.11	NA	0	11.89	0	0	3.61	NA	0	0	0	0	NA
caska-DreEX0019017	89.8	35.47	4.01	3.8	0.56	0	0	0	0	0	0	NA	0
ccny-DreEX0019841	66.13	0.66	0	0	0	NA	0	0	0	0	0	0	0
celf1-DreEX0020617	67.81	65.78	5.64	5.05	1.3	0.59	0	0	3.36	3.42	0.83	2.07	2.91
chchd6a-DreEX0021351	70.3	4.75	5.46	2.81	0	0	0	0	1.48	0.85	0.4	0	0
chchd6b-DreEX0021359	79.34	84.25	27.31	3.81	0.34	0	2.08	12.82	4.45	1.06	0.68	0.42	0.61
ckap5-DreEX0021859	71.95	0	1.38	4.39	0	0	0	0	0	0.94	0.16	2.14	0
clasp1a-DreEX0021913	76.61	5.01	2.29	3.22	0	0	3.43	NA	0	0	0	0	7.9
clasp1a-DreEX0021914	28.33	49.31	0	1.03	0	0	0	0	0	0	0	0	0
clasp2-DreEX0021946	74.5	27.22	2.16	19.53	0	0	1.43	0	1.83	0	0	0	0
clasp2-DreEX0021947	66.74	90.6	2.98	12.7	17.9	24.06	12.82	0	4.17	1.54	10.38	0	9.21
cltcb-DreEX0022266	95.86	72.73	58.89	46	25.76	27.18	35.86	36.26	53.58	41.24	28.49	38.95	22.01
cpeb4-DreEX0023919	87.8	100	3.82	17.63	16.27	3.71	2.57	8.32	10.27	16.62	2.98	3.6	NA
cryzl1-DreEX0024456	87.28	3.55	43.76	0.78	0	0	0	0	0	0	0.41	0	0
csnk1g1-DreEX0024575	49.67	2.66	NA	19	1.32	NA	0	NA	2.19	0	5.14	0	0
ctnnb1-DreEX0024849	58.1	3.39	25.95	6.68	0.09	0.96	1.46	0	0.87	1.01	0.26	1.6	0.38
daam1a-DreEX0025590	73.65	19.4	0.38	5.07	0	0	0.9	0	0	0	0	0	0
dctn2-DreEX0026022	90.96	49.02	39.25	9.44	0.39	0	32.95	0	3.63	35.95	8.2	1.16	NA
dctn4-DreEX0026038	87.93	23.98	0.72	40.92	31.55	0	30.88	0	0	0	1.44	4	34.81
dip2ba-DreEX0027020	30.51	75.17	1.49	1.31	0	0	0	0	0.79	0	0	0	0
dnmt1-DreEX0027818	74.32	NA	0	2.4	0	0.14	0	NA	3.2	0	0	0	0
dock11-DreEX0027937	80.23	7.41	0	0	0	0	0	0	0	0	0	NA	NA
dock7-DreEX0028015	91.01	96.76	28.27	26.96	7	7.25	23.03	2.73	6.66	4.75	4.92	14.39	17.14
dock9a-DreEX0028031	41.05	42.09	0.3	0	0	0	0	0	1.38	0	0	0	NA
dock9b-DreEX0028046	60.99	18.5	8.75	7.63	0	0	0	6.62	34.9	0	4.62	NA	NA
dock9b-DreEX0028047	63.44	55.04	5.34	0	2.71	0	0	0	6.08	0	1.96	NA	NA
eif4g3b-DreEX0029590	27.01	0	2.37	0.73	0	0	0	0	0	0	0	0	0
emc1-DreEX0029850	77.84	73.96	3.15	2.55	2.56	2.67	3.81	0	13.01	1.8	1.3	4.49	5.61
eprs-DreEX0030456	35.78	8.41	0.33	2.23	0.19	0.73	0	0	0.76	0	0	0.83	0
evi5b-DreEX0030978	75.83	29.92	0	0.71	0	0	1.81	0	1.68	0	0	0	0
exoc1-DreEX0031062	90.04	0	14.3	15.97	0.14	0	0.88	0	0	0	0	0	0
exoc6-DreEX0031112	92.73	47.7	28.06	20.09	0	0	3.27	0	13.34	7.42	9.27	0	0
exoc7-DreEX0031137	84.08	47.31	35.41	7.05	0.61	0	0	NA	3.57	1.16	6.44	3.13	0
foxk1-DreEX0033317	34.89	1.29	1.18	1.58	0	0	0	NA	0.58	0.97	0	0	0
frya-DreEX0033581	82.63	0	0.37	0	0	NA	0	0	0.44	0	0	0	NA
fryl-DreEX0033622	73.17	96.52	6.57	0.7	0.21	0	0	2.17	0.62	1.79	2.39	0	3.29
fryl-DreEX0033626	89.56	2.17	62.77	57.45	9.67	0	41.97	8.5	20.76	44.66	37.86	17.83	0
gdpd5b-DreEX0034661	90.76	0	18.77	0	0.22	0	0	0	0	0	0	0	0
git1-DreEX0034900	95.11	61.6	44.95	46.38	0	0	5.51	0	0	NA	0	NA	2.51
git2a-DreEX0034907	88.23	50.75	0	3.18	0	0	5.21	0	2.62	0	0	NA	9.91
gne-DreEX0035359	74.57	17.17	2.85	6.4	1.12	0	3.67	0	0	20.47	0	57.47	NA
gramd1a-DreEX0035911	92.22	30.58	3.07	8.87	0	NA	0	NA	0	NA	0	0	4
gulp1a-DreEX0036711	37.16	3.78	1.62	0.08	0	0	0	0	0	0	0	NA	0
hdac11-DreEX0037039	26.63	2.8	0	6.48	0	0	0	0	0	0	0	NA	0
hexb-DreEX0037402	34.31	4.23	0.77	0.04	0	0	0	0	0	0	0	0	0
ift80-DreEX0038783	31.43	2.92	0	1.35	0.27	0	0	NA	0	0	0	NA	0
ift88-DreEX0038810	35.25	27.5	0.98	8.95	8.84	0	7.35	0	0	NA	5.57	NA	4.4
inpp4aa-DreEX0039419	95.95	19	1.31	8.51	0	NA	0	0	0	0	0	NA	0
kif1b-DreEX0041536	95.46	44.46	6.32	30.94	9.27	7.14	10.21	0	5.03	10.2	2	NA	NA
lipeb-DreEX0043115	43.5	8.8	0	0	0	0	0	0	0	0	0	NA	NA
lpcat3-DreEX0043476	68.32	70.28	0.6	2.63	3.36	0	0	0	0	0	0	4.28	0
lrba-DreEX0043564	32.51	5.43	0	0	2.5	0	0	NA	0	1.36	0	0	0
macf1a-DreEX0044250	47.19	1.75	14.74	4.28	0	0	8.21	0	6.6	0	0	NA	NA
map4k5-DreEX0044744	80.95	17.05	55.37	34.69	45.04	3.72	19.71	10.16	9.33	10.68	9.99	0	42.87
map7d1b-DreEX0044788	90.29	48.78	0.94	5.29	0	NA	0.98	0	0	11.11	0	0	0
march8-DreEX0045047	60.48	1.67	0	2.54	0	0	0	0	0	0	0	0	0
metap1-DreEX0046066	40.27	29	0.33	2.55	0	0	0.46	0	0	0	0	0	0
mhc1zaa-DreEX0046354	91.25	52.72	72.33	43.74	10.18	NA	14.53	10.18	20.12	13.39	27.22	6.61	NA
micu1-DreEX0046514	75.08	40.19	0.18	0.8	0	0	0	0	0.24	0	0	0	0
mrpl12-DreEX0047335	55.15	10.87	1.12	2.77	0.46	0	0	0	0	0	0.22	0	0
mtss1-DreEX0047991	75.51	38.85	51.97	40	22.07	19.49	28.09	25.93	43.47	27.49	30.68	42.94	17.57
mtss1la-DreEX0048005	78.1	19.58	7	18.68	0	NA	0	NA	7.54	0	0	0	0
nav2b-DreEX0049312	45.83	36.22	0	0	0	NA	0	0	1.19	6.32	0	0	0
nktr-DreEX0050760	54.73	39.04	36.38	27.7	19.19	12.32	12.32	28.82	35.24	2.27	13.87	9.9	30.39
nrg1-DreEX0051571	81.97	NA	NA	47.77	0	0	4.47	0	0	3.32	0	NA	2.1
ocrl-DreEX0052465	94.21	20.51	75.37	39.72	44.72	15.3	17.07	21.71	26.28	2.94	13.34	10.27	NA
osbpl7-DreEX0052802	55.91	NA	0	0	0	0.64	0	1.06	0.51	NA	0.33	NA	0
pdha1a-DreEX0054374	69.66	77.53	39.58	11.6	9.51	41.55	9.92	21.13	27.23	10.02	28.85	8.34	2.39
phf21ab-DreEX0055086	71.63	0	0	0	0	0	0	NA	0	0	0	0	0
phyhd1-DreEX0055283	43.81	30.83	0	0	0.32	0	0	0	0	0.47	0	0	1.7
picalma-DreEX0055371	79.21	16.76	5.67	0.96	0	0	0.43	0	0.41	0.45	0	1.19	0
picalmb-DreEX0055387	89.52	0	35.92	2.45	0	NA	0	0	2.36	0	0	0	0
pikfyve-DreEX0055636	51.81	0.48	9.04	0	0	0	5.96	9.2	0	0	0	NA	0
pikfyve-DreEX0055638	86.36	0.58	63.15	10.18	0.65	NA	10.45	0	14.45	17.44	7.37	5.88	0
pnpla7a-DreEX0056697	29.89	0	0	0	0	0	0	0	0	0	0	0	0
ppip5k1b-DreEX0057469	40.36	0	0.14	0	0	0	0	0	0	0	0	0	0
ppip5k2-DreEX0057481	39.04	0.92	0	0	0.45	0	0	0	0	0	0	0	0
ppm1ba-DreEX0057497	31.93	0.87	0	0.36	0.23	0	0	0	0	0	0	0	0
ppp3cca-DreEX0057819	84.75	42.6	2.43	18.31	7.99	21.95	1.61	0	1.97	0	9.09	4.4	1.59
ppp6r3-DreEX0057914	66.64	2.38	6.14	2.27	0	0	0	0	1.11	1.2	0.43	0	0
prdm10-DreEX0057991	73.46	2.89	0	2.62	1.78	0	0	0	0	0	0	NA	0
psd2-DreEX0058791	84.65	45.13	18.37	4.47	0	NA	0	0	0	0	0	0	NA
ptk2ab-DreEX0059290	85.85	0	47.16	19.3	0	0	0	0	2.91	0	0	0	0
ptk2ab-DreEX0059302	90.62	56.56	16.84	38.6	8.82	0	NA	0	11.53	NA	2.86	0	0
ptk2ab-DreEX6041474	62	89.13	26.27	0.81	0	0	NA	7.91	24.72	3.12	1.84	0	NA
ptprfb-DreEX0059625	73.05	0	0	0.41	0	NA	0	0	0	0	0	0	3.84
ptprfb-DreEX0059639	74.12	32.56	0	0.77	0	NA	0	0	0	1.38	0	0	0
ptprk-DreEX0059683	53.52	15.87	13.55	2.32	8.89	0	8.47	0	0	0	1.53	0	NA
pus7-DreEX0059894	63.45	0	7.55	1.51	0	0	0	NA	0	0	0	0	0
rab3ip-DreEX0060280	28.77	0	2.3	0	0	0	0	NA	0	1.55	0	5.2	0
rapgef6-DreEX0060879	87.99	NA	47.58	32.43	10.6	NA	10.86	0	4.4	6.33	5.61	8.56	2
reep3a-DreEX0061623	29.6	7.96	7.48	0.64	3.06	NA	0.58	0	2.82	0	1.05	0	0
sec22bb-DreEX0064793	86.25	50.17	2.16	2.56	2.33	0	1.44	NA	0	2.89	1.04	3.49	0
sept15-DreEX0065253	36.45	0.73	15.04	4.02	0.27	0	0	2.74	1.32	0	0.71	0	0
sh3glb1b-DreEX0065997	41.49	5.71	0.2	0.72	0.73	0	0	0	0	0	0	0	1.05
sh3glb1b-DreEX0065998	58.73	43.16	1.77	3.87	6.53	0	2.72	1.19	2.78	1.88	2.54	3.31	5.33
sh3glb2a-DreEX0066003	76.59	8.29	13.49	22.83	0	0	7.06	NA	6.2	NA	3.2	NA	0
sh3glb2b-DreEX0066007	93.56	88.44	8.85	2.98	0.99	0	3.01	NA	3.13	12.14	0	NA	0
sh3glb2b-DreEX0066015	87.21	89.56	17.75	31.99	22.66	11	24.54	NA	41.33	NA	12.66	7.34	11.93
si:ch211-200p22.4-DreEX0067362	53.73	0.82	0	1.66	0	0	0	NA	0	0	0	0	0
si:ch211-259g3.4-DreEX0068029	61.46	2.6	0	0	0	0	0	0	0	0	0	0	0
si:dkey-126h10.2-DreEX0069265	70.76	1.77	0	12.34	0	0	0	0	0	0	0	NA	NA
slc38a10-DreEX0072759	83.15	4.98	41.38	33.65	6.21	4	6.73	0	10.2	8.02	2.89	4.42	6.51
slc43a2a-DreEX0072910	86.17	5.9	1.62	3.01	0	0	0	NA	0.48	0	0.97	0	0
slc43a2b-DreEX0072920	55.63	0.35	9.82	38.43	24.13	NA	0.14	NA	12.15	1.33	5.52	0	0
snx14-DreEX0074263	68.43	50.54	44.26	5.19	1.67	1.69	1.21	4.9	1.18	0.87	0	0	0
spsb4b-DreEX0074981	72.79	8.63	30.39	23.69	4.45	2.52	5.13	0	9.69	0	4.23	18.34	NA
src-DreEX0075047	90.65	15.38	0	12.5	6.52	11.69	4.76	0	0	0	0	NA	0
ssh2b-DreEX0075418	71.7	0.27	0	0	0	0	0	0	0	0	0	0	0
synj1-DreEX0076889	96.89	1.15	1.26	17.19	0	0	6.98	0	0	0	0	0	0
tln1-DreEX0079141	38.38	24.52	0	0	0	0	0	0	0	0	0	0	0
tmem184ba-DreEX0079584	57.94	15.14	3.48	4.1	0	0	0	0	0.74	0	0	0	0
tmem245-DreEX0079727	85.18	44.43	28.93	39.02	12.71	2.94	5.14	23.44	11.4	3.32	8.93	0	NA
tmem67-DreEX0079892	36.83	0	0	0.69	0	0	0	0	NA	4.76	0	NA	0
tnikb-DreEX0080180	25.92	0	0	0	0	0	0	0	0	0	0	NA	NA
tpd52l1-DreEX0080767	47.3	28.36	0	15.21	0	0	0	0	0	0	1.33	0	0
tpd52l1-DreEX0080770	51.79	25.06	2.41	2.09	0.36	0	0.52	1.86	4.35	1.34	2.01	0	0
tpd52l2a-DreEX0080776	80.27	91.14	0.98	3.7	3.73	0	1.04	1.02	1.65	0	0.41	0	1.57
tpd52l2b-DreEX0080784	65.87	46.5	0.84	1.81	0.56	0	0	0	0.41	0.5	0.56	0.91	0
trrap-DreEX0081616	41.73	0	0	0	0	0	0	NA	0	0	0	NA	0
uggt1-DreEX0083213	50.49	0	27.7	0	0	0	0	0	0	0	0	0	NA
vav2-DreEX0084167	54.76	51.22	0	0	0	0	0	0	0	0	0	NA	0
vdac3-DreEX0084235	88.92	12.39	9.53	3.16	0.53	0	0.1	0	1.27	0.84	0.08	0	0
vps8-DreEX0084571	77.96	15.17	7.38	4.46	0	0	0	0	0	0	0	NA	0
vti1a-DreEX0084665	78.63	1.22	4.78	13.36	0	0	0	0	1.92	0	0	0	0
zdhhc5b-DreEX0086313	43.42	0	20.11	0	0	0	0	0	0	0	0	0	0
zgc:171497-DreEX0087320	39.34	6.21	0	0	0	0	NA	0	6.86	0	0	NA	0

## Sheet: 1B
GENE_EVENT	Eggs	Embryo (2-4-cell)	Embryo (2hpf)	Embryo (1K-cell)	Embryo (Oblong)	Embryo (Sphere)	Embryo (Dome)	Embryo (Shield)	Embryo (8hpf)	Embryo (Bud)	Embryo (12hpf)	Embryo (10-somites)	Embryo (16hpf)	Embryo (20hpf)	Embryo (24hpf)	Embryo (26hpf)	Embryo (28hpf)	Embryo (32hpf)	Embryo (48hpf)	Embryo (72hpf)	Embryo (4dpf)	Embryo (5dpf)	Embryo (6dpf)	Embryo (7dpf)
ABCA7-DreEX0000047	0	0	0	0	0	0	NA	NA	NA	NA	NA	NA	NA	NA	NA	NA	NA	NA	NA	100	87.62	92.32	94.88	97.54
ADGRL3 (2 of 2)-DreEX0000236	NA	0	0	0	0	0	0	NA	NA	NA	NA	0	0	0	18.09	NA	NA	NA	37.13	NA	39.42	26.67	30.48	22.23
ARHGAP44 (1 of 2)-DreEX0000602	NA	0	0	0	0	0	0	NA	NA	NA	NA	NA	NA	0	0	0	NA	NA	100	NA	70.72	NA	84.36	80.4
ATL2-DreEX0000709	0.79	0.21	0.06	0	0.11	0	0	0.73	0	0	0	4.51	3.42	13.54	17.53	26.02	16.94	22.08	39.88	73.73	72.52	72.42	78.5	80.72
ATP11B-DreEX0000717	0	2.47	0.34	0.84	0.76	0.84	0.79	1.87	0	1.77	0	0	0.56	1.23	3.85	0	5.23	8.93	14.47	32.9	26.31	19.51	19.86	33.98
CABZ01084323.1-DreEX0002174	NA	NA	NA	NA	0	NA	NA	NA	NA	NA	NA	NA	NA	4.53	12.41	0	8.21	51.87	52.79	71.26	70.02	76.85	72.88	76.58
CABZ01084323.1-DreEX0002175	NA	NA	NA	NA	NA	NA	NA	NA	NA	NA	NA	0	NA	10.24	31.58	21.41	34.75	44.04	53.97	76.21	77.3	88.7	80	82.4
CENPF (2 of 2)-DreEX0002642	0	0	0	0	0	0	0	0	0	0	0	0	0	3.63	4.9	3.08	0	7.07	8.08	NA	13.73	35	13.73	26.67
CIT-DreEX0002786	10.48	3.9	2.68	3.17	3.61	5.73	3.73	3.61	6.43	0	8.81	3.81	0	7.61	8.71	1.94	3.27	4.82	8.04	33.99	25.71	39.76	40.32	41.46
CPEB2-DreEX0003080	NA	NA	NA	NA	NA	NA	NA	0	0	0	0	10.82	6.76	15.79	56.67	13.89	13.05	37.49	57.7	78.57	80.05	73.81	80.59	86.69
DAB2-DreEX0003483	NA	NA	NA	NA	NA	NA	NA	NA	0	NA	NA	0	0	0	0	2.62	0	0	0.81	11.48	15	11.11	35.52	25.76
ERC1 (3 of 3)-DreEX0004027	0	0	3.27	0	0	0	0	NA	NA	NA	0	0	0	2.22	0	0	NA	10.84	13.02	12.65	15.04	33.67	38.81	46.24
GK2-DreEX0004728	NA	5.74	0	0	0	0	0	0	NA	0	0	0	0	1.58	0	6.63	0	0	23.47	11.94	12.79	9.87	19.57	20.1
NAV1 (2 of 2)-DreEX0006256	NA	NA	NA	NA	NA	NA	NA	NA	31.39	71.75	48.45	67.94	57.85	60.27	84.59	NA	NA	66.61	74.27	80.46	73.06	NA	85.2	75.39
RELN-DreEX0007444	NA	NA	NA	NA	NA	NA	NA	NA	NA	NA	NA	0	0	14.28	59.16	9.16	43.44	41.32	69.42	65.25	71.03	51.57	65.97	65.82
RUNDC1-DreEX0007654	1.68	0	0	0	0	0	0	0	NA	NA	0	NA	0	32.47	NA	26.86	NA	NA	74.86	81.77	77.48	89.74	86.84	78.63
SCYL2-DreEX0007764	0	0	0	0	0	0	0	0	0	0	0	0	3.49	5.6	14.03	17.86	5.52	37.17	28.6	23.31	55.07	72.11	58.62	41.27
SNX2-DreEX0008261	1.54	1.3	1.71	0.91	1.54	3.18	0.52	0.66	9.79	0	0	0	2.88	3.16	13.34	2.61	7.69	15.83	20.74	34.76	22.97	25.83	19.32	18.01
TACC2-DreEX0008613	NA	NA	NA	NA	NA	NA	NA	NA	NA	2.2	0	4.75	0	7.81	33.39	28.36	26.09	55.24	58.75	63.2	68.14	70.16	66.44	64.2
TNKS (1 of 2)-DreEX0008971	NA	47.24	54.25	57.73	55.77	38.61	37.72	14.21	4.62	4.13	0	2.11	1.29	7.46	15.28	4.42	7.39	33.68	42.45	61.94	66.98	63.91	73.95	71.82
TRAPPC9 (1 of 2)-DreEX0009049	38.89	40.34	54.03	53.56	49.67	42.97	NA	NA	NA	NA	NA	15.79	0	7.37	36	NA	NA	NA	51.06	NA	60.04	NA	69.07	77.97
UNC13B (2 of 2)-DreEX0009269	0	0	0	0	0	0	0	0	0	NA	NA	NA	0	0	0	NA	NA	NA	22.02	6.8	4.04	12.04	18.99	2.28
abi1a-DreEX0010301	NA	0	0	0	0	0	0	0	0	0	0	8.26	3.19	5.32	15.96	6.45	7.07	23.22	19.09	38.04	27.43	30.43	34.75	52.85
abi2a-DreEX0010320	3.14	1.23	1.69	1.05	1.39	0.58	0	3.3	0.49	0	0	0	0	0	2.81	0	2.39	8.88	16.96	26.55	41.19	27.47	44	45.56
abi2b-DreEX0010329	0	0	0	0	0	0	0	0	0	0	0	0	0	4.8	11.51	9.43	16.12	35.18	40.62	45.64	63.04	65.15	69.69	65.59
acot7-DreEX0010726	0	0	0	0	0	0	3.08	0	8.86	NA	NA	NA	13.73	8.43	NA	NA	10.45	26.72	10.31	41.72	42.14	7.69	37.82	34.03
acvr2aa-DreEX0011037	NA	0	0.32	0.48	0.26	0	0.82	1.43	0	0	0	0	0	0	1.05	2.29	1.32	6.43	6.86	12.25	14.96	16.4	9.56	11.62
adgrl2a-DreEX0011656	NA	NA	0	0	0	0	0	0	0	0	0.51	0	0.91	1.2	1.14	1.7	0	4.09	9.37	11.11	34.96	34.75	34.75	36.04
adgrl2a-DreEX0011657	NA	0	0	0	0	1.18	15.31	0.37	2.99	1.22	0.68	1.96	0	2.04	2.16	1.29	2.95	9.5	8.46	30.54	23.23	36.5	23.49	23.18
adgrl2b.1-DreEX0011677	NA	0	0	0	0	0	0	0	0	0	0	0	0	0	1.59	0	0	1.81	9.18	3.38	13.28	21.88	30.43	28.17
adgrl3.1-DreEX0011687	NA	4.02	4.6	0	0	10.2	0	NA	NA	NA	NA	NA	NA	17.49	31.25	36.65	27.24	59.12	74.56	71.43	72.8	86.1	81.05	80.44
agrn-DreEX0012142	NA	NA	0	0	0	NA	NA	NA	NA	0	0	1.86	0	3.65	20.75	10.81	12.95	35.71	28.38	48.29	42.57	52.4	45.99	55.53
agrn-DreEX0012143	NA	NA	NA	NA	NA	NA	NA	NA	NA	NA	NA	3.68	0	0	1.68	6.1	0	4.06	10.14	19.09	13.98	19.66	19.89	18.42
als2b-DreEX0012858	NA	0	0.2	0	0	0.5	0	0	0	1.35	0	1.71	0	3.36	8.55	2.29	13.15	26.5	20.96	23.02	25.84	23.61	27.85	27.66
ank2b-DreEX0013086	NA	0	0	0	0	NA	0	NA	NA	NA	NA	0	0	13.96	44.39	20.79	19.59	47.42	76.06	87.57	87.4	91.1	82.22	79.34
ank3a-DreEX0013114	NA	NA	0	NA	0	NA	NA	NA	NA	NA	NA	0	0	2.16	32.99	5.67	11.26	62.41	61.59	79.19	65.36	57.38	67.13	74.28
ap1b1-DreEX0013673	0	0	0.14	0	0	0	0	0	0	0	2.33	0	0	0	0.78	0	0	9.22	11.44	24.62	21.5	26.38	25.37	31.35
ap1g1-DreEX0013683	0	0.44	0.29	0.26	1.15	1.42	0	0	0	0	0	1.09	1.2	9.81	16.04	3.83	11.43	14.58	16.2	30.47	28.44	38.7	24.7	24.22
ap2a1-DreEX0013723	0	0	0	0	0	0	0	0	0	0	0	0	0	0	1.72	0	1.37	1.96	4.52	10.16	14.89	22.86	19.26	22.86
ap2m1a-DreEX0013740	0	0	0	0	0	0	0	0	0	0	0	0.64	0.17	0.53	2.96	0.72	2.27	2.12	10.32	23.1	21.85	33.31	26.69	28.03
apbb1-DreEX0013846	0	2.24	1.68	2	2.2	1.86	3.73	3.1	1.2	2.58	2.1	2.15	3.75	5.01	26.51	8.3	10.21	36.26	61.27	75.14	75.42	77.35	77.88	75.34
apbb2b-DreEX0013859	NA	NA	NA	NA	NA	NA	NA	NA	0	0	5.84	2.8	1.01	3.31	13.81	4.38	6.81	36.5	29.43	58.38	57.52	83.08	54.4	60.57
arhgap23a-DreEX0014281	NA	NA	NA	0	12.17	NA	NA	NA	NA	NA	6.45	5.07	2.69	5.71	23.52	5.09	2.94	20.27	27.23	33.61	49.03	60.02	49.06	66.28
arhgap44-DreEX0014380	NA	0	0	0	0	0	0	0	0	NA	NA	0	0	15.01	22.43	NA	NA	NA	40.33	NA	64.56	NA	60.4	59.32
arhgef11-DreEX0014462	NA	0	0	0	0	0	0	NA	0	0	0	2.51	0	1.21	NA	0	NA	2.39	20.64	NA	32.65	46.93	50.99	58.84
arhgef1b-DreEX0014527	0	0	0	0	0	0	0	0	0	2.59	0	0	0	0	0	2.32	2.23	0	1.08	14.22	5.88	24.49	9.57	7.31
arvcfb-DreEX6010954	NA	0	0.69	9.26	3.03	6.99	0	NA	NA	NA	NA	15.01	12.38	26.16	10.94	15.38	17.21	33.15	24.43	47.44	34.6	63.54	40.14	30.53
asap1a-DreEX0015055	NA	NA	NA	NA	NA	NA	NA	NA	0	0	0	2.1	0	10.9	30.11	9.84	6.45	35	59.36	77.09	71.57	84.7	70.09	83.6
asap1b-DreEX0015073	0	0	0	0	0.29	0	0	0	NA	NA	NA	0	0	14.4	21.24	4.6	11.36	22.07	57.84	80.15	82.19	85.71	75.66	75.47
asap2a-DreEX0015082	NA	2.17	0.52	0	1.01	2.22	1.82	0	1.38	0	1.77	2.89	7.04	11.27	31.89	19.2	31.64	53.73	55.91	74.05	60.83	66.87	74.98	71.99
aspg-DreEX0015304	0	0	0	0	0	0	0	0	0	0	0	0	0	1.1	4.24	10.53	4.68	4.68	10.64	37.04	20.62	30.47	23.45	11.31
aspg-DreEX0015305	0	0	0	0.96	0	0	0	0	0	0	0	0	0	0	12.47	2.44	0	11.11	28.95	54.72	51.1	51.28	58.71	53.39
atp11a-DreEX0015646	NA	NA	NA	NA	NA	NA	NA	NA	NA	NA	0	NA	16.19	14.95	18.97	14.65	NA	10.27	33.7	69.14	70.97	84.44	84.77	85.26
atxn2-DreEX0016233	NA	7.04	5.79	2.86	3.19	3.65	2.35	15.76	NA	10.54	0	NA	0	12.89	37.36	22.43	19.27	NA	40.28	47.41	39.64	48.84	29.5	35.23
baiap2b-DreEX0016553	NA	NA	NA	NA	NA	NA	NA	NA	NA	NA	NA	0	0	6.2	0	9.79	NA	13.19	31.65	41.11	42.41	36.91	65.24	65.64
bbs9-DreEX0016703	NA	0	7.14	0	1.47	0	0	0	NA	NA	NA	NA	0	0	NA	0	NA	34.43	33.09	NA	84.64	NA	79.22	87.5
bcam-DreEX0016717	NA	NA	NA	NA	NA	NA	NA	NA	NA	7.31	4.37	2.21	4.12	3.76	2.88	5.24	6.78	18.83	19.62	15.42	25.39	32.12	34.07	38.33
bin1b-DreEX0016939	0	0	0	0	0	0	0	0	0	NA	NA	0	0	0	0.23	0	0	0	0	2.24	8.31	12.39	20.69	14.35
cacna2d4b-DreEX0018202	NA	NA	0	NA	0	0	NA	NA	NA	NA	NA	NA	NA	NA	NA	NA	NA	NA	NA	89.74	78.51	81.54	78.83	73.33
cadps2-DreEX0018370	0	0	0	0	0	0	0	3.19	0	NA	NA	NA	0	0	11.89	0	NA	NA	14.44	62.18	55.35	65.79	72.27	66.46
camk2d2-DreEX0018617	NA	NA	0	NA	0	NA	NA	NA	NA	NA	NA	NA	NA	33.13	11.44	45.68	25.31	20.04	19.06	27.67	38.09	35.86	43	44.6
caska-DreEX0019017	NA	0	0	0	0	0	0	0	0	0	0	0	2.19	0	11.25	0	0	17.31	15.5	38.2	38.24	45.46	43.71	54.13
cc2d2a-DreEX0019277	0	0	0	0	0	0	0	0	0	0	0	0	0	0	0	0	0	0	4.32	NA	36.17	36.16	40.48	57.17
ccny-DreEX0019841	NA	NA	NA	NA	NA	NA	NA	NA	0	0	0	0	1.65	3.96	0	8.83	0	37.66	26.52	51.71	75.1	51.53	71.85	76.01
celf1-DreEX0020617	0.59	0.41	0.54	0.34	0.25	0.59	0.3	0.4	0.53	0.43	0.31	1.27	1.39	1.94	5.9	3.05	4.35	12.84	20.44	26.32	31.73	43.6	38.27	35.92
chchd6a-DreEX0021351	0	0	0.1	0	0.13	0	0.29	0	0	0	NA	4.47	0	4.2	6.23	21.18	6.56	11.73	23.36	34.76	41.87	29.86	45.16	50.09
chchd6b-DreEX0021359	0	0	0	0	0	0	0	0.81	1.45	3.23	0	2.22	1.2	3.62	12.37	10.01	18.74	36.27	37.66	30.45	38.69	33.13	43.93	39.31
chl1b-DreEX0021596	NA	NA	0	NA	NA	NA	NA	NA	NA	NA	NA	NA	NA	38.89	55.19	28.45	30.81	60.21	63.6	81.32	75.38	83.94	74.54	77.32
ckap5-DreEX0021859	0	0	0.05	0	0.04	0	0	0	0	0	0	0	0.24	0.82	0.92	1.23	1.13	1.56	8.05	17.54	32.37	29.09	42.08	45.55
clasp1a-DreEX0021913	NA	3.32	0.76	3.4	1.42	2.85	1.64	5.96	4.12	0	8.22	5.71	8.22	19.94	42.37	28.36	3.96	56.6	51.6	NA	59.12	35.68	54.05	59.83
clasp1a-DreEX0021914	NA	0	0	0	0	0.19	0	0	2.79	0	1.41	4.9	4.06	7.76	17.36	7.22	19.44	24.53	35.8	23.44	18.48	34.69	21.91	25.93
clasp2-DreEX0021946	0	0	0	0	0	0	0	0	0	0	0	0.84	0.52	2.47	5.5	3.09	3.51	9.93	12.63	19.79	43.87	51.89	56.63	59.98
clasp2-DreEX0021947	14.65	29.28	33.88	35.29	40.38	42.15	31.61	29.72	33.98	22.73	40.12	16.01	33.67	35.79	35.15	40.94	39.09	61.34	56.66	68.4	57.91	72.28	59.27	59.08
cltcb-DreEX0022266	NA	31.92	32.36	37.98	37.86	36.62	44.35	38.08	34.82	25.77	20.75	23.97	21.16	16.86	30.85	19.6	30.43	44.05	54.98	78.6	83.85	84.4	87.56	90.41
col4a6-DreEX0023333	NA	NA	NA	NA	NA	NA	NA	NA	NA	0	0	7.22	3.44	4.61	2.71	5.94	2.52	4.2	9.36	12.97	14.44	9.52	22.22	32.91
cpeb4-DreEX0023919	1.87	2.75	4.22	3.99	4.93	5.08	2.23	10.68	9.74	11.23	7.54	28.59	11.72	19.5	37.52	29.16	21.93	45.54	47.7	75.54	84.09	64.82	75.54	79.56
cryzl1-DreEX0024456	NA	0	0	0	0	0	0	NA	NA	0	0	0	0	1.93	16.39	12.05	22.58	34.62	28.74	47.09	43.14	47.74	20.15	43.37
csnk1g1-DreEX0024575	0	0.45	0.21	0.5	0.32	0	0	0	0	0	0	0	0	0	4.68	10.81	2.71	16.79	19.51	20.48	28.99	32.65	44.72	51.16
ctnnb1-DreEX0024849	0.61	0.34	0.39	0	0.35	0.09	0.5	0.57	0.45	0.2	0.16	0.52	0.25	0.53	1.45	0.97	1.5	3.32	6.16	14.83	21.37	35.62	28.28	28.96
cyfip2-DreEX0025322	NA	NA	1.02	0	3.37	0.63	0	0	9.83	0	0	7.14	7.45	16.3	25.53	20.37	24.65	34.48	55.73	79.47	75.58	77.08	77.72	77.44
daam1a-DreEX0025590	0	0	0	0	0	0	0	0	0	0	0	0	0.85	2.71	1.62	1.2	6.09	4.4	22	32.22	23.88	39.09	32.06	26.49
dctn2-DreEX0026022	0	0	0.21	0.88	2.52	0.7	1.03	4.36	1.15	4.05	2.09	8.72	5.55	7.43	19.89	13.15	24.23	29.62	37.37	44.66	54.7	59.64	52.22	55.49
dctn4-DreEX0026038	0	0	0	0	0	0	0	1.01	7.29	11.36	19.7	37.07	41.49	49.76	46.33	55.56	29.19	52.78	46.05	56.94	49.33	57.13	45.07	51.14
dennd4a-DreEX0026450	NA	NA	3.83	25.18	11.11	12.73	NA	NA	NA	0	7.69	0	2.58	10.57	18.92	17.95	NA	NA	67.02	64.76	61.24	92.2	75.57	72.94
dip2ba-DreEX0027020	0	0	0	0	0.07	0	0	0	0	0	0	0	0.6	5.36	5.41	9.87	6.93	4.68	5.24	4.29	6.23	11.9	8.73	13.26
dnmt1-DreEX0027818	0	0	0.04	0	0	0	0	0	0	0	0	0	0	0	0.43	0	0.6	0.76	9.03	20.54	23.26	19.18	37.75	52.52
dock11-DreEX0027937	0	0	0	0	0	0	0	0	0	NA	0	0	0	2.79	5.73	0	23.31	26.38	65.03	69.54	59.47	65.54	64.51	51.21
dock4b-DreEX0027963	0	0	0	0	0.2	0	0	0	NA	0	0	0	0	0	13.04	11.11	3.52	8.3	39.87	57.89	57.98	53.36	46.15	55.83
dock7-DreEX0028015	4.34	5.61	4.18	2.14	3.69	3.17	2.66	0	1.17	1.58	3.51	15.89	8.65	17.76	33.33	20.94	28.12	25.8	67.27	69.59	63.38	71.01	69.97	62.8
dock9a-DreEX0028031	0	0	0	0	0	0	0	NA	NA	4.59	1.52	0	0.99	0	0.86	0.88	0	1.88	3.62	12.39	17.65	29.35	19.18	26.27
dock9b-DreEX0028046	0	0	0	0	0	0	0	NA	NA	NA	NA	NA	0	1.53	1.83	5	11.28	5.45	5.3	18.59	24.22	38.39	27.68	41
dock9b-DreEX0028047	0	1.6	0	0	0	0	0	NA	NA	NA	NA	0	0	3.52	21.98	0	3.9	46.36	10.92	40.7	31.21	46.36	46.56	40.56
dvl1a-DreEX0028567	NA	0	2.77	0	0	NA	NA	NA	NA	NA	0	NA	NA	4.63	4.21	0	9.2	14.29	4.91	29.4	19.17	30.98	17.84	15.88
dync1i1-DreEX0028594	NA	NA	NA	0	0	0	0	NA	NA	NA	NA	NA	0	0	10.93	7.21	3.64	7.76	16.18	19.26	26.23	39.1	37.88	27.16
eif4g3b-DreEX0029590	0	0	0	0	0	0	0	0	0	0	0	0	0	1.01	1.79	4.2	6.56	3.15	4.42	17.61	17.83	10.57	17.92	8.99
emc1-DreEX0029850	3.81	3.6	2.68	3.11	3.38	2.14	3.34	24.2	26.94	52.06	63.82	50.65	52.12	49.7	38.6	37.94	33.66	52.29	55.12	55.36	44.53	55.51	52.1	38.4
emid1-DreEX0029880	NA	NA	NA	NA	NA	NA	NA	NA	NA	NA	0	0	2.51	0	0	0	0	4.98	13.23	23.55	23.63	41.08	35.93	52.24
eprs-DreEX0030456	0	0	0	0	0	0	0	0	0	0	0	0	0	0	0.37	0	1.11	0.52	1.48	6.02	3.77	8.3	5.84	1.72
eps15l1a-DreEX0030487	NA	NA	NA	NA	NA	NA	NA	NA	14.89	12.73	0	NA	0	19.27	30.43	0	NA	42.17	39.23	76.88	67.37	80.33	79.57	70.39
erc1a-DreEX0030586	NA	NA	NA	NA	NA	0	NA	NA	NA	NA	NA	NA	NA	0	0	NA	23.31	17.84	28.82	7.29	42.99	48.41	49.23	57.74
evi5b-DreEX0030978	0	0	0	0	0	0	0	0	0	0	0	0	0	1.51	1.35	1.96	0	18.76	9.43	10.55	20.37	26.17	22.46	25.11
exoc1-DreEX0031062	0	0	0	0	0	0.43	4.2	1.19	0	1.52	0	5.08	0.73	12.13	15.02	8.12	12.94	33.02	39.74	48.62	38.84	50.69	43.05	35.23
exoc6-DreEX0031112	NA	0	0	0	0	0	0	0	0	3.85	0	32.23	15.18	34.05	57.73	40.17	38.52	61.99	74.54	77.57	79.44	77.83	77.76	75.63
exoc7-DreEX0031137	0	0	0.56	1.09	0	0	0	7.51	0	0	0	0	1.34	2.77	19.32	2.95	15.1	18.4	26.55	40	54.33	52.53	39.23	45.08
fmn2b-DreEX0033086	0	0.11	0.15	0	0	0	0	0	0	NA	NA	NA	NA	NA	80.36	NA	NA	NA	88.16	89.57	87.95	82.68	86.59	83.9
fmnl2b-DreEX0033111	NA	0	0.55	3.31	1.25	1.68	1.11	5.61	1.83	1.18	1.76	9.83	4.13	7.58	28.45	19.97	27.03	47.78	70.31	83.1	87.35	98.01	91.61	90.03
fnbp1b-DreEX6103911	0	0	0	0	0	0	0	NA	NA	NA	NA	NA	NA	NA	NA	NA	NA	NA	89.2	NA	63.06	NA	85.76	NA
foxk1-DreEX0033317	0	0	0.12	0.34	0.13	0	0.34	0.3	0	0.58	0	1.17	0.55	0	0	0	0.98	0	0.78	1.91	4.12	4.74	4.92	4.63
frya-DreEX0033581	NA	NA	NA	NA	NA	NA	NA	NA	NA	NA	NA	NA	NA	0	0	NA	0	16.67	3.12	8.93	29.62	47.87	48.28	46.46
fryb-DreEX0033604	NA	NA	NA	NA	NA	NA	NA	0	1.15	0	0	0	8.36	15.23	31.16	17.24	43.19	73.37	72	78.48	80.82	84.04	76.36	76.39
fryl-DreEX0033622	0	0	0	0	0	0	0	0	0	1.68	0	0	0	0	7.27	4.51	5.05	16.52	20.61	33.81	24.56	45.61	20.94	25.55
fryl-DreEX0033626	0	2.46	0.43	0.99	0	0.94	1.68	0	0	6.74	4.12	30.4	22.98	27.24	31.37	40.32	40.63	34.37	43.88	55.3	40.25	59.86	50.75	52.72
gdpd5a-DreEX0034649	0	3	4.75	2.14	5.22	4.19	0	NA	NA	NA	NA	0	0	0	0	0	NA	NA	5.93	11.86	55.15	57.38	39.9	62.76
gdpd5b-DreEX0034661	0	0	0.12	0	0	0.17	0	0	0	0	0	4.19	0	5.31	3.52	3.32	10.14	36.84	27.98	40.23	63.64	57.89	57.55	61.6
git1-DreEX0034900	0	1.61	0.99	0.41	0.77	0	1.64	0	0	16.8	21.78	16.59	42.17	40.5	63.64	28.99	50.84	61.9	66.06	NA	66.32	73.98	72.91	79.06
git2a-DreEX0034907	0	0	0	0	0.27	0.36	0	0	0	0	0	0	3.52	6.47	11.63	10.64	32.56	52.06	50.53	60.82	68.71	78.35	79.4	75.83
gli2b-DreEX0035002	NA	NA	0	0	0	0	NA	NA	0	0	0	0	0	0	0	2.04	0	0	13	26.74	10.58	26.74	12.74	12.93
gne-DreEX0035359	0	0	0	0	0	0	0	0	0	0	0	4.57	2.1	2.22	11.09	4.42	14.14	6.56	33.78	36.67	64.58	47.69	62.22	63.34
gramd1a-DreEX0035911	NA	0	0	0	0	0	0	0	0	0	0	3.27	1.84	6.99	16.33	4.67	7.06	27.56	40.46	60.34	57.59	64.33	61.37	63.02
gramd1ba-DreEX0035920	NA	NA	NA	NA	NA	NA	NA	NA	NA	NA	NA	NA	NA	11.24	NA	NA	NA	NA	54.45	NA	83.65	72.28	59.28	62.39
gulp1a-DreEX0036711	0	0	0	0	0	0	0	0	0	NA	0	0	0	0	2.95	0	0	0	1.2	9.07	11.94	19.56	20.33	19.21
gulp1b-DreEX0036722	NA	NA	0	NA	0	0	NA	NA	NA	NA	NA	NA	0	0	0	0	0	0	2.46	31.83	47.77	50.52	36.87	37.48
hdac11-DreEX0037039	NA	0	0.26	0	0	0	0	0	NA	NA	NA	NA	NA	NA	NA	NA	NA	NA	0	13.73	31.34	NA	22.58	20
hexb-DreEX0037402	0	0	0	0	0	0	0	0	0	0	0	0	0.2	0	0.27	0	0	3.8	3.87	14.16	32.48	32.74	34.78	34.83
ift80-DreEX0038783	0	0	0	0	0	0	0	0	0	0	0	0	3.76	4.23	3.75	6.81	13.11	23.76	9.19	19.51	24.21	21.71	35.87	18.35
ift88-DreEX0038810	0	NA	0.52	1.22	0.85	0	0	0	0	3.64	0	0	2.19	3.07	9.67	10.46	0	24.02	12.82	22.81	27.01	22.54	44.95	45.64
inpp4aa-DreEX0039419	0	0	0.93	0	0	0	0	NA	NA	NA	0	0	0	12.44	25.32	3.57	16.17	22.44	48.54	69.01	63.16	71.58	74.32	73.34
itsn1-DreEX0040386	NA	0	0	0	NA	NA	0	0	0	0	0	0	2.66	2.27	NA	5.04	0	13.86	NA	NA	NA	NA	NA	NA
kcnma1a-DreEX0040954	NA	0	0	0	0	0	0	0	5.96	NA	NA	NA	0	0	2.89	0	4.4	0	3.22	17.05	15.2	11.12	24.35	18.71
kcnma1a-DreEX0040955	0	0	0	0	0	0	0	0	0	NA	NA	NA	NA	0	10.9	14.44	0	5.89	23.79	40.22	39.32	43.33	47.43	31.6
kcnn1b-DreEX0040973	NA	0	0	0.43	0.18	0	0	0	NA	NA	NA	NA	NA	21.2	NA	NA	NA	NA	26.86	NA	17.16	NA	16.79	29.68
kif1b-DreEX0041536	0	2.65	5.14	2.25	5.4	3.89	0	0	0	0	0	7.36	10.42	26.34	39.1	30.75	11.7	47.35	67.34	58.19	72.33	78.97	72.36	73.68
lipeb-DreEX0043115	NA	0	0	0	0	0	NA	NA	NA	NA	0	NA	0	0	NA	0	NA	0	2.2	20.79	36.84	NA	44.57	29.09
lpcat3-DreEX0043476	NA	0	0.52	1.65	1.42	1.82	3.51	0	0	0	0.54	1.62	1.83	1.45	3.15	0	1.62	4.69	11.29	7.25	8.08	9.84	6.87	5.99
lrba-DreEX0043564	0	0	0	0	0	0	0	0	0	2.14	0	0	0	0	2.98	0	0	0	0	0	11.39	26.92	16.64	11.95
macf1a-DreEX0044250	NA	NA	5.62	0	0	0	NA	NA	NA	13.19	15.45	0	0	12.16	9.56	7.59	NA	29.98	16.5	14.69	9.21	12.85	25.75	21.53
map4k5-DreEX0044744	5.48	5.73	4.67	5.46	5.78	5.96	4.74	34.76	42.52	60.26	66.22	82.2	75.98	69.43	80.49	64.92	67.55	75.45	64.82	53.9	45.84	61.81	56.4	57.76
map7d1b-DreEX0044788	NA	NA	NA	NA	NA	NA	NA	NA	0	0	0	0	0.51	2.19	5.43	2.79	11.2	23.63	31.91	42.79	50.84	63.99	59.11	52.37
mapkbp1-DreEX0044981	0	0	0	0	1.04	0	0	0	0	0	0	0	0	0	9.88	18.51	NA	NA	51.09	49.47	58.82	NA	45.36	38.89
march8-DreEX0045047	0	0	0	0	0	0	0	0	0	NA	0	0	0	3.91	3.32	4.19	12.28	26.58	37.93	63.64	34.1	63.64	39.77	30.43
mast3b-DreEX0045163	NA	3.76	1.56	2.49	2.61	0	0	8.2	0	5.15	4.95	0	15.15	7.25	0	7.25	NA	NA	26.79	NA	62.75	NA	81.29	81.4
mef2ca-DreEX0045884	NA	NA	0.77	0	4.06	2.71	6.05	0	NA	NA	NA	0	6.43	0.94	0.94	1.09	1.66	2.17	0.52	1.12	12.54	8.46	5.27	4.31
metap1-DreEX0046066	NA	0	0	0	0	0	0	0	0	0	0	0	0	0	1.4	0.78	0	0.34	1.98	7.45	5.14	6.18	2.84	3.06
mhc1zaa-DreEX0046354	NA	NA	NA	NA	NA	NA	NA	NA	NA	NA	NA	NA	NA	NA	NA	NA	NA	NA	NA	66.77	80.28	91.07	91.01	84.93
micu1-DreEX0046514	0	0	0	0	0	0	0	0	0	0	0	0	0	0.19	6.65	2	0.61	4.48	8.84	25.2	19.92	19.84	21.59	16.89
mrpl12-DreEX0047335	0	0	0	0	0	0	0	0	0	0	0	0	0	0	0	0.46	0.23	0.44	5.6	2.56	12.76	6.33	10.45	6.14
mtss1-DreEX0047991	17.95	38.1	34.62	40.57	35.83	31.09	37.25	37.33	30.74	44.91	36.57	33.79	35.55	37.86	47.02	37.33	46.32	52.57	40.5	39.17	52.36	68.88	37.78	48.82
mtss1la-DreEX0048005	NA	NA	3.49	4.31	0	0	0	NA	0	6.61	11.87	61.77	55.82	70.43	75.11	76.69	85.56	82.34	64.27	67.9	50.75	70.32	51.56	53.74
myo5aa-DreEX0048705	NA	NA	19.31	50.25	34.65	29.95	23.71	25.19	NA	NA	NA	NA	NA	40.23	29.73	NA	NA	58.7	70.17	73.86	72.37	72.91	77.53	79.03
nadl1.2-DreEX0049098	NA	NA	NA	NA	NA	NA	NA	NA	NA	NA	NA	NA	NA	NA	97.53	100	92.11	100	98.53	96.05	96.1	97.14	95.53	94.46
nav2b-DreEX0049312	NA	0	NA	0	0	0	0	0	0	1.72	0	0	0.68	0	1.48	1.2	1.45	2.79	0.47	11.87	11.66	18.99	16.89	8.59
nbeaa-DreEX0049383	NA	NA	32.45	52.45	50.72	58.77	42.81	NA	NA	NA	NA	NA	NA	33.98	56.71	NA	NA	67.26	76.44	89.74	82.44	88.36	81.4	84.27
ncam1b-DreEX0049495	NA	0	5.21	10.45	3.01	2.18	10.56	12.38	NA	NA	NA	NA	10.33	1.78	0.64	1.42	0	3.74	5.21	30.62	18.21	26.83	23.55	21.97
nktr-DreEX0050760	NA	0	0	1.27	0	1.57	3.86	3.31	7.84	2.56	18.05	29.94	27.7	31.5	45.5	14.74	NA	63.67	23.49	32.39	61.96	36.33	75.33	75.07
nrcama-DreEX0051524	NA	0	9.97	0	10.9	NA	0	NA	NA	NA	NA	NA	NA	NA	NA	NA	NA	NA	79.03	53.19	59.83	45.91	52.69	44.3
nrg1-DreEX0051571	NA	0	0	0	0	0	0	0	0	4.29	13.68	NA	9.34	17.67	26.89	NA	NA	NA	24.02	50.73	49.59	48.88	37.04	25.26
nsmfb-DreEX0051772	13.09	37.63	43.22	32.68	49.58	42.52	29.19	NA	NA	NA	NA	NA	NA	NA	75.11	NA	NA	95.82	90.42	95.35	96.29	94.77	95.99	95.9
ocrl-DreEX0052465	21.55	14.17	16.23	19.5	9.54	17.07	12.83	5.71	19.9	17.56	25.82	34.7	23.18	29.77	55.37	32.99	24.53	52.72	55.05	51.95	46.58	48.64	46.52	51.65
osbpl7-DreEX0052802	0	0.2	0.17	0.06	0.21	0.48	1.08	2.72	0.33	0	2.74	0	0	0	0	0	0	0	0	31.58	38.38	31.4	35.29	42.43
pdha1a-DreEX0054374	50	31.74	44.41	41.01	41.55	44.32	33.48	31.59	13.4	0.94	1.47	1.2	2.58	4.97	11.16	5.19	5.34	6.47	19.84	24.87	27.63	26.41	30.35	24.96
pfkpa-DreEX0054831	NA	NA	NA	NA	NA	NA	NA	NA	NA	NA	NA	NA	NA	10.29	37.63	0	32.02	39.58	64.93	82.84	83.78	89.85	88.03	84.51
phf21ab-DreEX0055086	NA	0.93	2.67	0	0.76	3.22	0	0	1.09	0	0	0	1.06	0	6.56	1.48	3.28	22.9	31.51	34.8	40.4	47.11	31.95	34.84
phka2-DreEX0055154	NA	NA	7.9	NA	0	NA	NA	NA	NA	NA	NA	NA	NA	NA	0	NA	NA	NA	22.27	17.34	21.58	32.53	23.47	31.87
phyhd1-DreEX0055283	0	0	0.17	0	0.28	0	0.38	0	0	0	0	0	0	0.65	2.3	0.88	0.92	0	1.95	8.26	11.5	17.01	9.84	7.67
picalma-DreEX0055371	0	0	0	0.38	0	0	0	0	0	0	0	2.33	1.17	1.76	8.32	2.93	2.98	26.12	27.73	30.98	36.81	47.17	33.64	36.16
picalmb-DreEX0055387	0	0	0	0	0	0	0	0	0	1.53	0	0	0	0	10.65	1.37	3.99	8.74	25.89	49.2	60.71	67.06	64.14	60.89
pikfyve-DreEX0055636	NA	NA	0	0	0	0	0	NA	NA	NA	0	0	0	0	10.49	3.41	0	6.46	8.62	17.84	23.09	21.35	24.12	33.66
pikfyve-DreEX0055638	NA	NA	5.19	6.54	7.49	19.27	6.8	NA	NA	9.86	7.37	25.18	20.92	14.09	23.49	16.88	14.4	46.67	40.85	35.77	50.18	63.64	53.95	68.79
pnpla7a-DreEX0056697	0	0	0	0	0	0	0	0	0	0	0	0	0	0	0	0	0	0	0	4.26	2.94	5.07	4.3	4.07
ppip5k1b-DreEX0057469	0	0	0	0	0	1.23	0	0	NA	0	0	0	0	0	0	0	0	0	3.49	0	0.39	0	0	0.48
ppip5k2-DreEX0057481	0	0	0	1.2	0	0	0	0	0	0	0	0	0	0	0	0	0	0	10.55	27.13	13.96	40.88	19.58	19.46
ppm1ba-DreEX0057497	0	0	0	0	0	0	0	0	0	0	0	1.53	1.33	0	0	0	5.04	7.81	10.86	14.89	18.45	26.72	20.26	12.92
ppp3cca-DreEX0057819	55.06	23.81	12.79	10.5	9.58	16.11	24.48	26.72	8.86	0	3.74	9.04	10.05	7.69	22.23	6.71	9.54	21.47	34.9	49.52	59.64	68.37	68.99	72.77
ppp6r3-DreEX0057914	0	0	0	0	0	0	0	0.46	0.24	0.34	0.44	0.56	0.76	3.72	8.47	4.3	5.33	11.71	26.95	31.16	25.6	26.97	27.66	20.84
prdm10-DreEX0057991	0	0	0.46	0	0.29	0	0.65	0	0	0	1.68	0	0	1.43	6.08	3.07	12.5	3.57	10.9	53.31	37.03	35.63	47.6	37.18
prom1a-DreEX0058509	NA	0	0	0	0	0.89	0	0	0	NA	NA	0	0	0	8.12	4.35	NA	NA	4.17	29.63	25.94	39.57	31.8	32.46
psd2-DreEX0058791	NA	NA	NA	NA	NA	NA	NA	NA	NA	NA	NA	0	0	17.27	57.04	3.85	12.04	49.61	72.72	72.71	69.72	90.54	78.12	71.26
ptk2aa-DreEX0059275	NA	NA	0	0	0	0	0	NA	0	0	3.27	24.11	13.99	16.15	41.84	36.2	37.62	39.54	53.11	69.3	59.57	65.34	59.68	61.38
ptk2ab-DreEX0059290	0	0	0	0	0	0	0	0	0	0	0	4.21	9.25	13.33	28.19	21.41	23.8	17.95	45.97	39.03	44.63	58.63	45.86	43.09
ptk2ab-DreEX0059302	0	0	0.18	0.47	0.27	0.67	0	0	0	8.82	6.97	6.76	15.25	19.6	17.09	18.52	22.76	48.84	51.7	38.82	60.99	44.68	54.1	52.17
ptk2ab-DreEX6041474	3.55	0	0.4	0	0	0	0	0	NA	0	0	0	0	1.16	5.86	6.68	6.98	11.57	19.29	34.28	34.77	36.23	28.55	28.46
ptprfa-DreEX0059604	NA	NA	0	NA	NA	NA	0	NA	NA	NA	NA	NA	0	0	0	0	0	6.2	5.83	0	4.58	4.05	9.03	13.63
ptprfa-DreEX0059605	NA	0	0	0	18.95	0	7.41	NA	NA	NA	NA	NA	5.73	4.68	6.85	6.2	3.34	18.98	28.6	44.05	53.75	71.97	63.94	74.61
ptprfa-DreEX0059606	NA	NA	0	0	NA	0	0	NA	NA	NA	NA	0	0	1.53	0	3.08	0	5.03	10.7	22.44	31.41	55.46	45.05	54.22
ptprfb-DreEX0059625	NA	NA	0	0	0	0	7.13	0	0	0	0	0	0	0	0.71	0	0	2.76	4.53	11.78	22.92	24.88	23.75	22.36
ptprfb-DreEX0059639	NA	0	0	0	0	0	0	0	0	0	0	0	0	0.82	4.52	2.4	3.06	5.18	4.7	10.9	22.17	32.79	31	22.14
ptprk-DreEX0059683	0	0	0	0	0	0	0	0	0	0	2.61	0.78	2.7	0.79	2.93	7.99	1.27	19.93	13.61	24.02	38.39	29.09	35.71	30.47
ptprsa-DreEX0059753	NA	0	0	0	0	0	0	0	0	0	0	0	0	0	3.53	0	7.06	7.64	5.23	31.34	19.86	46.5	19.39	25.86
ptprsa-DreEX0059754	NA	11.3	11.86	12.56	7.54	4.94	7.68	26.85	8.15	0	0	1.9	3.16	5.04	13.74	7.02	0	18.46	34.61	60.69	62.74	72.29	71.83	76.13
ptprub-DreEX0059801	NA	0	0	0	0	0	0	0	NA	NA	NA	NA	NA	0	0	0	NA	NA	15.26	44.3	58.77	66.69	38.89	46.23
pus7-DreEX0059894	0	0	0.39	0	0	0	0	1.01	5.95	1.47	3.25	4.96	5.07	6.68	5.83	8.95	8.56	14.18	9.08	17.1	18.01	36.35	18.99	10.22
rab3ip-DreEX0060280	NA	0	0	0	0	0	0	0	0	0	0	0	0	0.8	1.53	2.19	2.25	2.28	2.02	14.32	13.79	16.32	12.33	11.58
rapgef2-DreEX0060842	NA	0	3.86	0	1.02	0	NA	NA	NA	NA	NA	9.58	0	0	21.47	8.79	13.15	27.63	45.37	62.5	66.94	85.03	65.49	68.99
rapgef6-DreEX0060879	NA	0	0	0	0	NA	0	0	3.03	1.92	8.5	6.64	25.99	36.38	34.26	38.03	38.76	41.32	50.3	67.92	61.25	75.15	56.95	65.21
reep3a-DreEX0061623	NA	NA	4.78	2.6	1.66	0	4.96	NA	NA	NA	0	NA	0	0	10.19	10.81	0	NA	6.33	8.97	7.94	6.23	12.62	16.96
rims2b-DreEX0062259	NA	NA	0	0	3.83	0	NA	NA	NA	NA	NA	NA	NA	0	NA	NA	NA	0	5.14	40.74	47.98	64.03	50.07	43.87
sdk1a-DreEX0064721	NA	NA	NA	NA	0	NA	NA	NA	NA	NA	NA	NA	NA	NA	8.05	NA	NA	NA	14	NA	35.5	NA	44.83	56.04
sec22bb-DreEX0064793	NA	0	0	0	0	0	0	0	0	0	0.68	0	1.33	2.75	4.26	1.7	1.33	8.94	23.12	23.81	38.29	48.29	45.63	36.29
sept15-DreEX0065253	0	0	0	0	0	0	0	0	0.1	0	0	0.28	0	0.11	0.84	0.26	1.01	1.35	3.4	8.38	26.97	27.33	41.2	45.12
sept4a-DreEX0065273	NA	0	0	0	0	0	0	0	0	NA	NA	0	0	0	5.58	NA	NA	NA	10.23	28.39	75.79	70.66	71.61	55.38
sh3glb1b-DreEX0065997	0	0	0	0.59	0	0	1.06	0	0	0	0	0	0	0.59	1.89	1.16	2.08	1.99	4.2	12.08	15.51	14.9	11.4	10.8
sh3glb1b-DreEX0065998	4.8	3.89	2.75	3.25	2.36	1.24	0	0	0	1.24	6.73	3.81	3	3.69	6.18	1.81	1.1	9.03	16.01	18.32	25.1	18.13	16.92	16.72
sh3glb2a-DreEX0066003	0	17.2	2.3	3.25	3.42	0.62	1.85	0	0	NA	NA	7.79	12.14	0	24.61	12.14	NA	28.88	14.9	NA	63.49	29.31	42.06	50.36
sh3glb2a-DreEX0066004	NA	0	1.27	0	0	0	2.51	0	0	NA	NA	NA	8.43	24.14	NA	NA	NA	NA	70.47	NA	83.26	NA	92.74	95.15
sh3glb2b-DreEX0066007	0.54	0	0.12	0.22	0.25	0.43	0	0	0	0	0	4.64	2.74	4.11	24.27	11.65	17.73	19.04	41.8	52.41	76.23	84.34	86.86	87.33
sh3glb2b-DreEX0066015	9.48	7.26	7.2	4.7	8.68	3.55	7.72	9.46	7.01	13.09	13.59	23.75	29.26	34.79	46.48	33.59	27.13	56.71	60.05	74.09	73.7	83.61	72.02	74.28
shank3b-DreEX0066093	NA	NA	NA	NA	NA	NA	NA	NA	NA	NA	NA	NA	NA	6.67	NA	NA	NA	NA	5.47	NA	63.59	NA	62.2	41.94
si:ch211-200p22.4-DreEX0067362	0	0	0	0	0	0	0	0	0	3.1	2.23	12.73	21.24	14.64	6.76	16.34	10.23	16.03	12.83	30.73	17.55	26.47	32.2	23.97
si:ch211-259g3.4-DreEX0068029	NA	0	0	0	0	0	0	0	0	0	0	0	0	0	6.41	0	8.49	10.35	9.99	32.58	38.71	45.08	35.94	36.59
si:dkey-126h10.2-DreEX0069265	NA	0	0	0	0	0	0	0	0	0	0	0	0	0.99	4.08	0	0.71	6.64	9.47	49.43	35.44	49.35	41.64	38.1
slc38a10-DreEX0072759	NA	11.96	7.21	14.99	10.84	9.09	18.58	18.99	14.29	18.99	16.71	25	21.13	26.09	21.74	21.98	32.85	56.65	32.33	30.3	17.97	28	23.26	28.57
slc43a2a-DreEX0072910	NA	NA	NA	NA	NA	0	NA	NA	NA	0	0	0	0	2.5	3.67	0	0	NA	24.09	18.1	39.12	47.62	34.82	30.15
slc43a2b-DreEX0072920	NA	0	0	0	0	2.71	0.96	1.17	1.73	3.99	5.51	14.89	9.61	21.32	64.57	28.98	45.95	56.01	68.51	83.53	68.39	36.1	26.55	25.97
slc8a2a-DreEX0073320	NA	NA	NA	NA	NA	NA	NA	NA	NA	NA	NA	NA	NA	NA	NA	NA	NA	NA	NA	NA	NA	NA	7.49	NA
slit2-DreEX0073464	NA	NA	NA	NA	NA	NA	NA	NA	NA	0	0	0	0	0	1.17	1.36	0	3.37	3.71	11.06	12.72	22.6	20.69	12.9
snx14-DreEX0074263	0	0.32	0.14	0	0	0	0.34	0.43	0	1.06	0	0	0	4.81	4.9	13.67	5.27	22.92	13.75	32.28	18.43	40.23	24.12	24.51
spag9a-DreEX0074637	21.15	49.2	15.55	30.74	27	33.65	49.46	NA	NA	NA	16.42	NA	37.84	40.34	76.38	61.88	NA	95	85.16	80.99	68.24	72.7	86.47	87.05
spock2-DreEX0074881	NA	NA	NA	NA	NA	NA	NA	NA	NA	NA	NA	NA	NA	50.87	87.06	90.99	82.49	65.08	80.03	81.02	83.57	85.88	85.34	88.83
spock3-DreEX0074887	NA	NA	0	NA	NA	NA	NA	NA	NA	NA	NA	NA	NA	32.01	70.08	40.91	65.89	93.09	82.71	89.72	88.33	92.25	89.83	92.65
spsb4b-DreEX0074981	4.54	3.71	4.28	2.63	3.77	4.64	11.71	9	2.95	0	1.31	5.19	4.43	4.87	21.94	8.01	24.18	16.75	17.34	37.52	33.15	51.88	46.67	55.44
src-DreEX0075047	0	0	1.04	4.35	0.71	0.52	0.89	0	0	NA	NA	1.05	1.69	1.27	0	2.99	0	21.95	32.79	53.12	46.05	72.09	49.76	54.36
ssh2b-DreEX0075418	NA	NA	0	0	2.47	0	0	0	0	0	0	0	0	1.82	36.84	6.24	NA	9.99	58.7	47.57	47.97	70	31.02	17.9
synj1-DreEX0076889	NA	0	0	0	0	0	0	NA	NA	0	0	3.03	0	3.08	23.53	28.21	9.43	31.25	46.61	70.54	77.25	85.4	81.82	79.27
synj1-DreEX0076894	NA	0	0	0	1.08	0	0	NA	NA	0	0	12.32	4.29	22.45	46.56	26.5	35.97	48.33	72.86	97.26	90.16	92.95	90.24	87.52
tenm3-DreEX0078179	NA	NA	0	0	0	0	NA	NA	NA	0	1.73	2.99	0.81	1.74	13.33	7.52	8.62	31.65	29.13	59.87	58.79	73.22	72.77	70
tln1-DreEX0079141	0	0	0	2.32	0.63	0	0	0	0	0	0	0	0	0	0	0	0	0	0.45	0	3.06	5.85	6.03	3.68
tln2a-DreEX0079151	NA	0	0	0	0	0	0	0	0	0	0	0	1.45	0	2.83	0	1.2	1.44	5.75	11.1	21.02	33.43	31.38	38.67
tmem184ba-DreEX0079584	0	0.07	0	0	0	0.11	0.15	0	0	0	0	1.74	1.24	1.89	7.33	3.66	5.36	7.83	16.51	34.43	40.42	48.55	41.1	40.3
tmem245-DreEX0079727	0	2.74	1.04	0	2.03	2.98	0	NA	NA	7.9	6.05	0	3.55	0	0	3.96	16.19	0	13.94	35.97	40.03	32.9	56.38	41.3
tmem67-DreEX0079892	0	0	0	0	0	0	0	0	6.13	0	0	0	0	0.43	0	0	0	1.82	0	1.69	41.57	6.12	4.67	6.67
tnikb-DreEX0080180	0	0	0	0	0	0	0	0	0	0	0	2.24	0	0	0	0	0	0	11.07	38.35	18.46	8.7	16.53	14.63
tpd52l1-DreEX0080767	NA	0	0	0	0	0	0	NA	NA	0	0	0	0	0	0	0	2.75	11.11	1.84	7.46	14.94	19.66	15.35	23.35
tpd52l1-DreEX0080770	0	0	0	0	0	0	0	NA	0	1.77	0	0	0	0.59	0	0.98	8.21	0	5.51	8.93	28.42	36.78	50.73	45.33
tpd52l2a-DreEX0080776	0	1.33	0	0	0.52	0	1.62	0	2.59	1.27	1.56	5.68	3.66	5.5	16.02	9.69	14.41	31.34	28.73	39.37	42.46	45.29	41.44	36.61
tpd52l2b-DreEX0080784	0	0.09	0.24	0.16	0.33	0	0.39	0.94	0.47	1.04	1.23	3.86	3.29	5.69	16.08	7.79	12.11	34.47	28.61	30.61	34.29	39.27	39.68	40.72
trrap-DreEX0081616	NA	0	0	0	0	0	0	0	0	0	0	0	0	1.01	2.45	0	2.76	7.99	20.31	31.43	29.95	27.56	29.18	37.23
tsga10-DreEX0081679	NA	NA	NA	NA	0	0	NA	NA	NA	NA	0	NA	0	NA	0	NA	NA	NA	0	NA	NA	NA	NA	NA
ttyh2l-DreEX0082293	0	0	0	0	0	0	0	0	NA	0	0	0	0	0	0	0	0	5.2	1.46	30.36	16.52	41.54	20.16	10.78
uggt1-DreEX0083213	0	0	0	0	0.41	0.22	0	0	0	0	1.29	3.88	1.94	2.67	11.9	4.12	0	1.77	9.63	17.08	9.34	NA	16.62	28.6
unm_sa1614-DreEX0083453	NA	NA	NA	NA	NA	NA	NA	NA	NA	NA	NA	NA	NA	NA	NA	NA	NA	NA	63.61	NA	89.58	92.78	61.72	81.15
vav2-DreEX0084167	0	0	0	0	0	0	0	NA	0	0	0	0	5.69	4.64	0	16.28	0	24.14	24.9	0	11.86	23.33	35.35	26.22
vdac3-DreEX0084235	0	0	0	0	0.19	0	0	0.13	0.31	0.46	0.25	3.64	2.76	6.81	8.96	8.1	21.73	31.34	29.38	31.71	32.89	32.74	26.06	20.55
vps8-DreEX0084571	NA	NA	0	0	0	0	NA	NA	NA	NA	0	NA	0	5.31	15.67	4.8	4.8	12.42	27.46	52.96	42.31	31.48	52.02	39.92
vti1a-DreEX0084665	0	0	0	0	0	0	0.55	0	0	0	0	0	0	1.87	0	0	2.3	20.83	32.8	44.78	40.64	50.46	31.62	50.97
zdhhc5b-DreEX0086313	0	0	0	0	0	0	0	0	0	0	0	0	0	1.61	0	3.41	0	8.05	13.98	43.09	32.95	30.45	38.71	26.06
zgc:171497-DreEX0087320	0	NA	0	0	0	0	NA	NA	NA	NA	NA	NA	NA	NA	NA	NA	NA	NA	NA	NA	NA	NA	0	NA
BRD8 (2 of 2)-DreEX0000863	NA	NA	NA	NA	NA	NA	NA	NA	NA	NA	NA	NA	NA	NA	NA	NA	NA	NA	91.89	96.61	96.47	87.65	95.85	97.67
CAMSAP3 (1 of 2)-DreEX0002295	NA	0	0	0	0	0	0	0	0	0	0	0	0	0	5.75	0	10.09	6	9.87	42.52	22.46	37.3	32.51	28.57
CASKIN2 (1 of 2)-DreEX0002344	NA	NA	NA	NA	NA	NA	NA	NA	NA	NA	NA	NA	NA	0	0	NA	NA	NA	5.89	20.83	15.53	15	5.88	12.22
CPEB2-DreEX0003079	NA	NA	NA	NA	NA	NA	NA	16.61	12.74	21.79	8.4	38.8	13.53	12.41	52.58	22.78	17.86	51.09	57.69	55.54	79.65	70.88	76.71	80.64
DNAH10-DreEX0003636	NA	NA	NA	NA	NA	NA	NA	NA	NA	NA	NA	NA	NA	NA	NA	NA	NA	NA	NA	NA	NA	NA	NA	NA
EPB41L2-DreEX0003958	0	0.18	0.36	0.07	0.11	0.16	0.06	0	0.2	0.23	0.86	0	1.46	1.27	5.6	0.9	3.92	5.38	9.21	24.76	22.49	33.21	26.26	28.33
ERC1 (3 of 3)-DreEX0004029	NA	NA	0	0	0	0	0	NA	NA	NA	NA	0	0	2.19	7.55	2.13	NA	6.32	14.14	NA	22.94	NA	36.15	34.73
FKBP15 (2 of 2)-DreEX0004311	NA	0	0	1.85	0.4	0	0	0	0	0	0	4.17	8.13	7.21	14.03	8.94	12.06	16.13	22.09	40.23	18.43	32.61	20.24	13.59
KIF21B-DreEX0005387	NA	0.89	0.3	0.97	0.4	0	0	0	NA	2.95	0	0	NA	3.52	17.66	3.88	3.76	39.43	18.74	32.21	34.2	NA	42.29	38.72
LRP1 (2 of 2)-DreEX0005588	NA	NA	NA	NA	NA	NA	NA	NA	NA	NA	NA	NA	NA	NA	15.34	15.97	2.13	20.73	12.63	19.91	18.61	29.2	21.06	22.71
PQLC1-DreEX0007052	0	0	1.02	0	2.89	1.96	0	NA	23.08	NA	16.88	33.33	46.34	35.14	69.23	47.17	NA	56.36	43.07	72.73	56.99	NA	67.44	67.27
PRKCA (2 of 2)-DreEX0007085	NA	NA	NA	NA	NA	NA	NA	NA	NA	NA	NA	NA	NA	NA	NA	NA	NA	NA	NA	NA	7.57	24.07	14.94	16.98
RHOU (1 of 2)-DreEX0007502	NA	0	1.35	2.32	0.55	0	0	NA	NA	NA	NA	NA	6.46	0	4.2	6.2	3.66	10.86	18.26	NA	49.34	NA	41.18	NA
TANC1 (2 of 2)-DreEX0008656	NA	NA	0.54	0	0	1.56	0	0	NA	NA	NA	NA	0	0	5.15	0	NA	NA	1.52	11.19	23.14	NA	40.96	36.03
UNC13B (2 of 2)-DreEX0009271	0	0	0	0	0	0	0	0	NA	NA	NA	NA	0	0	0	NA	NA	NA	3.1	NA	39.66	NA	50.67	63.24
USP31-DreEX0009287	NA	33.21	22.71	34.06	28.21	31.52	30.44	NA	6.05	2.72	1.28	3.51	0	4.43	9.04	1.98	6.05	16.44	23.48	40.87	50.78	63.5	52.48	53.26
abcc9-DreEX0010129	NA	NA	NA	NA	NA	NA	NA	NA	NA	NA	NA	NA	NA	NA	47.69	NA	NA	25.19	29.36	33.71	33.65	48.27	43.09	30.85
abcc9-DreEX0010130	NA	NA	NA	NA	NA	NA	NA	NA	NA	NA	NA	NA	NA	6.16	2.28	NA	0	3.78	13.34	16.09	18.94	41.77	19.91	20.78
ablim3-DreEX0010412	NA	NA	NA	NA	NA	NA	NA	NA	NA	NA	NA	9.35	9.26	41.64	38.96	48.68	41.18	37.23	43.95	45.67	54	47.47	55.5	61.66
adam17a-DreEX0011114	NA	0	0.09	0	0	0	0.2	0	0	0	0	0	0	0	3.38	0	2.13	1.97	2.65	8.94	9.99	10.08	14.89	18.7
add1-DreEX0011514	0.11	0.11	0.06	0	0.05	0.05	0.19	1.3	1.32	2.27	2.6	4.5	2.24	6.7	8.52	11.26	10.48	19.18	24.62	24.02	28.1	23.51	27.66	26.45
adgrl2a-DreEX0011665	NA	NA	1.47	0	0	1.81	0	9.48	6.25	2.39	0.67	2.21	5.59	7.25	12.37	8.5	8.23	4.51	23.66	44.2	43.39	57.75	53.21	54.33
adgrl2b.1-DreEX0011680	NA	0	0	0	0	0	0	0	0	0.67	0	2.25	1.13	0	0.97	0.51	0	1.73	3.65	17.25	11.67	22.45	14.93	18.26
ank2b-DreEX0013091	NA	0	0	0	0	NA	0	NA	NA	NA	NA	0	0	1.31	18.53	8.95	5.99	21.38	50.18	50.96	66.05	74.52	72.54	70.28
ano5b-DreEX0013477	0	0	0	0	0.3	0	0	NA	NA	NA	0	0	0	0	0	0	0	0	1.5	3.03	5.88	16.67	9.29	16.42
aplp2-DreEX0013923	0	0.64	0.18	0	0	0.12	0.18	0.27	0	0	0.24	3.26	1.03	1.55	3.3	2.52	5.03	6.69	15.94	27.17	37.26	50.41	36.42	38.24
arhgap27-DreEX0014296	NA	NA	0	NA	NA	NA	NA	NA	NA	NA	0	2.33	2.19	0.66	5.26	1.3	4.76	0	6.7	0	12.94	13.64	14.16	12
asph-DreEX0015309	12.9	43.19	29.54	45.79	26.4	34.15	40.77	39.02	16.71	17.85	13.9	25.02	18.29	20.55	22.9	25.35	31.59	16.92	18.85	26.36	25.72	52.38	44.6	56.05
atp2b1b-DreEX0015813	0	0	0	0	0	0	0	0	NA	NA	NA	NA	NA	NA	NA	NA	NA	NA	14.24	36.07	71.46	67.39	51.42	61.63
atp9b-DreEX0016118	NA	5.77	13.25	13.14	15.01	14.23	5.18	4.94	NA	NA	NA	0	4.6	7.33	7.48	2.98	0	12.61	39.43	27.45	53.76	72.91	58.83	62.55
baiap2a-DreEX0016551	2.96	0.26	2.83	0.29	1.04	1.53	0	0	7.81	10.15	NA	0	14.49	3.63	6.49	18.11	5.22	4.89	30.98	41.38	35.97	48.49	41.19	44.12
bin1b-DreEX0016944	0	0	0	0	0	0	0	0	0	NA	NA	0	0	0	0	0	0	0.71	4.36	7.71	15.4	17.11	17.64	16.06
brd8-DreEX0017331	2.06	3.25	2.71	3.11	2.98	4.46	3.58	4.52	5.33	5.97	3.73	9.38	8.61	8.67	19.38	7.42	15.79	20.22	40.09	49.54	50.91	48.42	49.87	49.88
cadps2-DreEX0018374	3.42	2.77	4.5	2.19	2.99	2.2	4.63	7.63	15.98	NA	NA	NA	NA	4.82	NA	NA	NA	NA	24.81	NA	53.75	80.71	69.54	59.88
cadps2-DreEX0018377	0	0.16	0.21	0	0	0	0	0	0	NA	NA	NA	0	5.12	NA	4.31	NA	0	14.02	59.49	66.34	75.18	48.97	62.72
camk2d1-DreEX0018603	NA	NA	NA	NA	NA	NA	NA	NA	NA	37.77	32.84	24.95	23.84	24.12	21.85	29.87	41.41	46.61	56.72	38.72	50.27	60.08	61.83	66.05
camk2g2-DreEX0018641	NA	NA	0	NA	NA	0	NA	NA	NA	0	0	1.09	0.7	4.1	12.99	4.43	5.39	15.89	26.66	43.14	28.16	42.43	30	38.02
camkk1a-DreEX0018664	NA	0	1.61	0.76	1.18	0.61	0	NA	NA	2.56	0	1.54	2.7	2.7	3.12	2.22	9.09	NA	20.76	NA	54.69	81.82	69.41	63.51
camsap1a-DreEX0018704	1.99	1.57	0.5	0.69	3.05	1.33	1.84	0	NA	NA	NA	NA	NA	NA	NA	NA	NA	94.78	90.38	70.2	60.5	72.92	61.05	53.66
camsap1b-DreEX0018711	0	0	0	0	0	0	0	NA	0	0	0	0	0	0	1.95	0	0	0	0.58	6.32	10.27	10.63	6.39	5.31
camsap2a-DreEX6099100	NA	NA	2.21	2.02	0	0	NA	0	1.49	2.86	0	4.19	15.42	35.96	53.85	43.3	NA	52.81	63.72	80.39	81.88	90.7	89.55	91.99
camta1b-DreEX0018740	NA	NA	0	0	0	NA	NA	NA	NA	NA	NA	NA	NA	NA	NA	NA	NA	18.7	39.93	49.52	45.44	55.15	42.36	48.43
ccdc149b-DreEX0019436	4.94	2.84	1.08	0.65	1.47	3.29	2.53	NA	NA	NA	5.33	NA	NA	13.45	NA	NA	NA	NA	82.29	91.96	90.41	95.13	89.17	94.74
ccser2a-DreEX0019867	0	0	0.04	0	0	0	0	0	NA	0	NA	NA	NA	8.12	4.88	NA	2.35	NA	20.34	26.77	32.13	31.37	32.14	28.44
ccser2b-DreEX0019869	NA	NA	2.06	0	4.47	3.32	NA	NA	NA	NA	NA	NA	NA	NA	NA	NA	NA	NA	NA	NA	87.17	NA	94.11	100
cep131-DreEX0020837	NA	22.72	16.91	23.82	19.32	24.52	24.59	24.91	38.36	45.36	52.28	71.97	65.99	59.43	70.49	65.8	50.51	80.13	73.44	45.04	55.46	60.35	60.34	47.73
clta-DreEX0022247	0	0	0.03	0	0	0	0	0	0	0.08	0.05	0	0.03	0.37	3.88	0.46	3.65	6.33	18.87	37.45	44.6	53.32	52.55	57.94
cnksr1-DreEX0022437	NA	0	0	0	0	0	0.71	0	0	0	0	0	0	0	0	0	0	0	0	2.58	3.66	11.19	17.74	26.29
dgkza-DreEX0026704	0	0	0.14	0.49	0.36	0	0	0	0	NA	0	0	3.23	0.92	13.27	1.27	0	5.88	11.24	20.16	25.21	26.3	20.98	18.22
dlg3-DreEX0027239	6.2	7.93	9.28	11.59	8.12	6.21	10.13	10.35	12.68	24.24	15.31	18.34	11.35	12.17	11.62	18.46	13.13	13.9	25.24	18.18	27.8	21.46	32.93	30.35
dlg3-DreEX0027241	1.33	0.37	0.04	0.06	0.03	0	0	0	0	0	0.18	0.44	0.19	2.24	14.7	2.44	8.12	16.6	36.91	61.87	55.5	67.16	59.67	68.51
dnajc5ga-DreEX0027677	0	0	0	0	0.01	0	0.93	1.22	0	0	0	1.63	0	4.24	10.84	2.25	8.63	10.57	23.6	36.68	41.39	59.48	40.73	30.79
dnm1l-DreEX0027768	0	0.4	0.06	0.08	0	0	0.42	0	0	1.82	0	0	0	0	2.65	0	1.38	0	1.32	2.05	4.2	9.68	7.56	7.75
edem3-DreEX0028917	NA	0	0.83	0	0.68	0.47	0	0	0	0.51	0	0.79	0.3	2.29	9.35	3.12	9.71	12.33	29.25	23.42	25.12	34.67	21.39	29.67
eef1db-DreEX0029001	1.53	0.72	1.82	0	1.05	1.03	0.62	1.85	4.26	2.28	1.87	10.89	4.56	4.91	14.28	5.47	2.68	6.77	11.64	19	13.33	7.85	14.42	17.97
elmo1-DreEX0029709	3.03	1.84	2.04	1.75	1.94	1.46	2.38	2.84	1.29	2.99	1.03	10.53	2.62	4.56	20.32	7.5	19.85	28.57	40.5	44.27	57.84	62.6	64.17	65.92
elna-DreEX0029759	NA	NA	NA	NA	NA	NA	NA	NA	NA	NA	NA	NA	NA	NA	NA	NA	NA	NA	42.15	NA	16.08	NA	26.75	27.36
epb41a-DreEX0030176	0	0.36	1.25	1.04	1.59	1.62	1.41	NA	NA	0	0	0	0	1.66	4.47	4.45	5.96	9.44	16.49	23.6	26.61	34.23	35.08	35.95
epb41l3b-DreEX0030211	0	0	0	0	0	0	0	0.24	0	0	0.28	0	0	0.07	2.79	0.72	0.81	5.68	4.84	8.02	7.2	8.89	5.27	5
erc2-DreEX0030596	NA	NA	NA	NA	0	NA	NA	NA	NA	NA	NA	NA	NA	NA	NA	NA	NA	17.74	20.86	23.18	37.64	20.32	38.04	41.48
exoc7-DreEX0031140	0	0	0	0	0	0	0.75	0.83	0	0	0	0	0	0.38	6.33	1.04	6.22	13.11	26.79	35.08	36.85	33.41	29.49	24.79
frs2b-DreEX0033568	0	0	0	0	0	1.92	4.8	0.66	0.94	0	0.46	0.85	0.44	0.35	0.97	0.94	0	0.9	6.03	11.92	12.02	17.49	16.14	14.87
gbf1-DreEX0034448	NA	0	0	0	0	0	0	NA	NA	0	0	0	0	0	6.94	7.35	3.77	11.69	23.13	36.11	38.03	51.58	35.74	24.36
golt1ba-DreEX0035523	11.01	16.88	8.12	12.61	14.19	7.49	8.52	11.11	NA	NA	8.77	5.88	6.2	5	13.04	5.88	4.39	3.42	6.15	14.92	12.79	20.36	29.41	31.16
gphna-DreEX0035711	NA	1.27	0.33	0	0.7	0.79	1.35	0	NA	NA	NA	NA	15.15	15.07	42.86	22.39	28.81	33.33	38.98	45.21	38.53	45.45	43.75	39.7
grip1-DreEX0036251	NA	0	1.23	0.66	1.26	1.22	4.68	1.49	NA	0	0	0	0	0	3.59	0	2.52	1.5	7	29.42	22.53	32.59	27.82	28.24
gtpbp1-DreEX0036622	13.19	14.87	4.14	5.9	2.8	6.47	9.71	4.37	1.42	1.85	0.8	2.22	1.66	2.22	13.33	3.42	6.9	16.76	30.7	40.9	32.12	58.19	40.04	41.22
ift88-DreEX0038813	NA	NA	5.62	3.59	2.29	3.2	4.63	0	2.99	1.7	3.82	6.81	3.38	4.23	33.62	6.88	14.06	18.35	28.31	53.03	54.62	63.27	65.76	62.51
ift88-DreEX0038814	NA	NA	5.62	3.59	1.48	8.24	0	0	5.76	5.04	6.44	8.68	4.73	4.17	45.9	9.29	5.13	22.43	30.92	52.11	49.45	50.49	59.27	51.68
ikbkg-DreEX0039067	1.23	0	0	0	0.08	0.26	0	0.58	0	0.71	0	0.71	0	1.12	9.78	0.66	6.78	19.05	28.22	40.74	46.88	60.85	58.2	63.68
iqsec2-DreEX0039805	NA	NA	NA	NA	NA	NA	NA	NA	NA	NA	NA	NA	NA	6.98	NA	NA	NA	NA	32.09	NA	70.6	83.33	73.71	69.87
itpr1b-DreEX0040341	NA	0	0	0	0	0	0	NA	NA	NA	0	NA	NA	0	NA	NA	NA	NA	9.5	NA	66.05	56.76	83.34	63.67
itpr1b-DreEX0040342	NA	4.8	0.96	0	0.98	0	4.45	NA	NA	NA	0	NA	NA	0	NA	NA	NA	NA	5.52	NA	61.36	56.77	83.52	73.34
larp4aa-DreEX0042593	NA	2.36	0.59	1.7	1.93	1.32	1	2.61	1.6	1.86	1.16	3.37	5.11	7.56	16.95	6.14	10.14	19.59	12.76	25.47	22.01	24.05	26.4	24.96
larp4ab-DreEX0042600	0	0.47	1.34	1.41	0.53	0.64	1.17	1.19	3.43	1.21	2.19	4.83	4.27	4.4	10.84	8	7.45	6.43	10.03	15.32	23.7	12.4	18.4	17.6
ldlrap1a-DreEX0042771	0.45	0	2.11	1.48	0.49	0.3	0	0.83	4.55	0	2.82	13.7	14.3	14.94	22.48	18.01	31.48	14.55	13.39	17.74	14.1	18.15	24.04	12.57
ldlrap1b-DreEX0042776	NA	0	0	0	0	1	0	0	0	0	1.27	3.67	2.99	6.07	6.99	3.74	NA	2.99	12.79	NA	16.59	16.36	16.9	34.59
mapk8ip3-DreEX0044941	NA	NA	27.69	NA	NA	28.46	NA	NA	NA	NA	9.83	NA	NA	77.22	66.14	60.98	53.95	84.96	89.68	88.05	89.58	90.44	91.46	90.99
mark3a-DreEX0045084	6.12	5.16	3.3	6.55	3.9	2.49	5.47	7.73	7.77	14.07	10.22	13.32	10.28	13.1	17.44	10.15	12.32	13.42	30.04	47.26	47.99	47.33	45.26	45.79
meaf6-DreEX0045714	0.46	0.35	0.31	0.33	0.34	0.17	0.38	0.85	0.58	0.36	0.18	2.08	1.45	3.21	7.82	6.24	9.03	12.94	38.48	44.41	41.88	50.08	45.23	39.91
mical3a-DreEX0046454	NA	0	0	0	0	0	0	0	0	0	0	0	0	0	0.68	0	0.7	1.37	2.12	10.79	8.45	16.75	11.27	9.52
mllt4a-DreEX0046818	2.01	0.09	0.32	0.16	0.1	0	0	0	NA	0	0	0	0	0	2.31	0.91	1.66	5.69	10.73	18.6	19.14	21.2	15.67	16.2
mpx-DreEX0047271	NA	NA	NA	NA	NA	NA	NA	NA	NA	NA	NA	NA	NA	NA	67.6	NA	48.3	88.4	44.11	46.59	48.95	57.38	69.15	64.59
myo3a-DreEX0048688	NA	0	0	0	0	NA	0	NA	NA	NA	NA	NA	NA	NA	NA	NA	NA	NA	5.72	NA	43.11	59.76	68.99	72.1
ndfip1l-DreEX0049768	0.85	0.2	0.07	0	0.16	0.13	0.67	1.72	1.27	1.52	0.99	2.69	1.24	2.92	15.51	2.45	5.53	9.86	18.38	34.27	31.2	41.11	44.03	47.62
nfasca-DreEX0050371	NA	NA	0	0	0	0	NA	NA	NA	NA	0	0	0	0	1.96	0	9.2	7.79	4.8	17.7	31.1	33.36	26.88	24.29
nfia-DreEX0050421	NA	NA	NA	NA	2.56	NA	NA	NA	NA	NA	NA	NA	13.04	25	20	NA	NA	NA	74.56	54.9	59.76	81.4	55.11	54.49
nfixb-DreEX0050435	NA	NA	0	0	0	NA	NA	NA	NA	NA	NA	NA	NA	NA	NA	NA	NA	NA	44.52	59.53	57.36	51.05	63.17	68.29
nhsa-DreEX0050573	NA	NA	17.39	18.75	8.33	NA	NA	NA	NA	NA	2.22	0	0	0	0	0	NA	0	2.63	NA	44.19	NA	39.91	50.68
nrcama-DreEX0051526	NA	NA	0	0	0	NA	NA	NA	NA	NA	NA	NA	NA	12.14	57.97	29.33	NA	91.03	81.33	78.7	77.21	82.74	82.39	88.38
nt5c2a-DreEX6061652	NA	NA	NA	NA	NA	NA	NA	NA	0.95	2.05	0.87	0.85	0.66	1.42	4.07	0.91	2.98	3.22	17.37	21.52	31.68	54.74	52.66	72.33
osbp-DreEX0052712	NA	NA	0	3.45	4.35	NA	0	NA	NA	NA	NA	NA	NA	NA	NA	NA	NA	NA	12.23	NA	20.01	NA	23.74	26.41
osbp-DreEX0052713	2.13	0.45	1.72	1.38	1.39	1.29	1.69	0.4	0.9	1.03	0.62	1.34	0.77	2.49	5.41	3.43	7.9	10.55	17.86	38.3	34.65	34.99	36.93	45.32
osbp-DreEX0052716	0	0	0.29	0	0	0	0.27	0	0	1.39	0	0.99	0	1.17	1.33	0	1.03	0	1.23	4.88	6.78	10.83	9.06	6.7
osbpl7-DreEX0052801	0.59	1.95	1.5	1.89	1.85	2.49	0.91	0.5	0.32	0.59	1.02	0	0.56	0.75	0	1.41	2.86	0	0.54	8.37	20.33	33.75	31.07	28.97
pl10-DreEX0055942	4.08	5.15	5.62	3.42	5.2	3.73	6.62	14.15	17.68	16.76	14.41	31.88	15.18	16.08	20.54	21	22.89	26.18	37.66	49.67	45.06	48.4	52.41	51.78
pleca-DreEX0056138	NA	NA	NA	NA	NA	NA	NA	NA	0	NA	NA	0	1.87	0	3.12	0	0	1.56	2.42	1.76	4.96	2.42	5.91	9.06
ppp3cb-DreEX0057810	NA	2.44	0	0	0	0	NA	NA	NA	NA	NA	NA	NA	5	25.45	10.53	23.53	16.88	26.92	41.94	50.07	60.21	58.26	54.33
prcp-DreEX0057974	NA	NA	NA	NA	NA	NA	NA	NA	NA	NA	NA	NA	NA	NA	NA	NA	NA	NA	NA	NA	NA	NA	33.62	31.16
ptch1-DreEX0059175	NA	NA	NA	NA	NA	NA	NA	NA	NA	0	0	1.23	0	3.23	2.32	0.97	2.76	9.04	3.08	6.27	4.01	11.7	4.66	6.51
ptprfa-DreEX0059613	NA	0	NA	0	0	0	2.98	0	NA	NA	NA	0	0	0	0	0	0	0	2.04	11.46	5.94	14.04	9.8	8.3
ptprk-DreEX0059684	0	2.06	3.44	1.53	7.53	0	2.72	5.09	1.61	9.31	5.77	6.98	8.01	6.84	9.71	7.23	10.05	21.53	22.07	44.3	41.23	45.69	48.72	48.82
rabl6b-DreEX0060428	0	0	0	0	0	0.24	0	0	0	8.36	1.63	34.76	33.53	40.03	48.19	33.66	40.71	76.26	54.73	59.05	58.89	69.14	66.5	87.53
rap1gap2a-DreEX0060788	NA	NA	NA	NA	NA	NA	NA	NA	NA	0	2.04	NA	0	1.85	13.12	0	0	NA	12.82	NA	35.41	26.89	50.11	41.11
rasgef1ba-DreEX0060999	NA	68.97	73.85	74.29	62.17	55.94	72.46	80.49	NA	NA	82.61	NA	NA	NA	NA	NA	NA	NA	86.72	83.33	98.86	100	94.44	90.37
rimbp2-DreEX0062205	NA	NA	NA	NA	NA	NA	NA	NA	NA	NA	NA	NA	NA	NA	NA	NA	NA	NA	23.73	NA	59.11	64.69	49.24	57.53
rnf34a-DreEX0062692	NA	0	0.5	2.09	1.09	1.36	1.25	0	0	2.82	0	0	0	2.03	0	0	4.11	NA	13.25	21.19	17.5	25.38	27.78	21.72
sgce-DreEX0065763	NA	NA	NA	NA	NA	NA	NA	NA	NA	0	0	1.96	0.52	6.76	20.18	13.66	14.05	23.72	42.12	54.44	54.44	59.27	56.12	55.11
si:ch1073-219n12.1-DreEX0066260	NA	0	0	0	0	0	0	0	0	0	0.44	0	1.02	2.89	1.71	2.62	4.88	5.08	5.36	3.45	12.71	10.2	15.98	12.64
si:ch1073-280h16.1-DreEX0066275	6.43	10.42	9.14	19.64	10.72	9.97	10.42	NA	NA	NA	NA	NA	NA	0	9.34	4.76	NA	NA	47.22	NA	33.88	27.39	28.77	32.41
si:ch211-233a24.2-DreEX0067773	0	0	0	0	0	0	0	1.49	NA	2.33	0	0	2.33	8.33	20	3.7	3.03	38.03	38.7	45.26	44.3	55.56	43.74	55.7
si:ch211-236g6.1-DreEX0067813	NA	NA	NA	NA	NA	NA	NA	NA	0	NA	NA	NA	NA	6.25	30.12	15.38	NA	12	26.32	41.77	34.78	25.93	10	NA
si:dkey-14d8.2-DreEX0069355	NA	NA	NA	NA	NA	0	NA	NA	NA	NA	NA	NA	0	3.03	0	0	NA	NA	2.02	NA	0	NA	0	NA
si:dkey-71h2.2-DreEX0070910	NA	NA	0	0	0	NA	NA	NA	NA	NA	NA	NA	0	17.5	11.48	10.69	NA	0	40.78	50.01	31.62	51.86	25.85	33.81
slain2-DreEX0071878	0	2.51	4.11	1.76	4.16	3.15	0	4.99	6.07	2.1	0.71	1.41	0	1.06	19.25	5.02	6.04	17.64	24.33	28.09	41.35	42.53	42.92	45.34
slc38a3a-DreEX0072778	NA	NA	NA	NA	NA	NA	NA	NA	NA	NA	NA	NA	NA	NA	10.62	NA	NA	4.94	18.65	31.42	20.4	55.23	32.85	36.13
slc4a11-DreEX0073023	NA	NA	NA	NA	0	NA	NA	NA	NA	NA	NA	NA	NA	NA	NA	NA	NA	NA	5.11	NA	46.47	NA	71.79	65.57
sos1-DreEX0074539	NA	1.54	0.29	0.69	1.8	1.94	2.02	7.87	10	6.31	1.79	4.84	5.19	6.08	13.57	1.2	5.08	19.35	36.28	43.64	35.17	50	45.2	44.64
stac-DreEX0075676	NA	NA	0	NA	NA	NA	NA	NA	NA	NA	NA	NA	NA	NA	0	NA	NA	NA	27.56	NA	45.64	NA	63.78	48.19
stxbp5a-DreEX0076323	NA	NA	NA	NA	0	NA	NA	NA	NA	NA	NA	NA	NA	NA	NA	NA	NA	NA	83.61	NA	78.67	85.19	64.01	64.41
synj1-DreEX0076897	NA	0	0	0.98	0	0	5.17	NA	NA	3.33	5.42	0	0	0	15.12	0	10.55	10	10.34	16.92	16.12	21.16	21.3	17.63
synj1-DreEX0076899	NA	0	0	0	0	0	0	NA	NA	0	0	8.63	0	4.88	20.74	3.75	6.8	22.1	36.83	45.96	64.11	72.72	65.69	64.92
tanc1a-DreEX0077219	0	6.8	4.31	6.18	6.4	10.33	0	NA	NA	NA	NA	33.09	29.18	53.02	51.31	43.21	43.21	54.04	49.43	47.53	61.63	71.48	72.7	76.57
tapt1a-DreEX0077295	NA	NA	0	0	0	0	0	0	0	0	0.75	1.71	0	1.43	4.74	4.07	6.85	3.91	10.36	19.56	21.14	NA	42.07	40.23
tenm1-DreEX0078160	NA	10.71	11.24	12.5	5.52	NA	5.96	NA	NA	NA	NA	NA	NA	NA	NA	NA	NA	NA	57.1	87.25	84.45	85.88	85.35	82.99
tjp1a-DreEX0078961	0	0.66	0.99	1.56	0.77	0.15	1.77	0	0	1.65	0	0.51	0	0.2	0.87	0.34	2.13	2.05	3.33	9.94	8.07	15.7	9.85	14.46
tnfaip2a-DreEX0080103	NA	NA	NA	NA	0	0	NA	NA	0	0	0	NA	0	0	0	0	0	NA	8.77	6.67	NA	14.29	NA	NA
tpd52-DreEX0080763	2.15	0.93	1.47	0.35	0.35	1.22	0.78	0	0	1.28	0	3.55	1.52	1.32	4.07	0.96	2.88	0.75	6.35	14.7	13.59	27.85	24.79	29.57
tpd52l1-DreEX0080768	NA	NA	0	0	0	0	0	NA	NA	0	0	0	0	0.42	2.5	1.35	0	4.37	4.5	4.94	24.03	32.46	31.65	43.8
tpd52l1-DreEX0080769	0	1.64	0.53	0	0	1.33	0	NA	2.86	1.69	0.53	0	0	0.29	2.38	0.48	2.86	0	8.97	10.87	27.14	27.87	34.96	49.45
tpd52l2a-DreEX0080777	6.8	4.78	1.94	3.87	3.53	5.78	6.56	10.17	5.25	9.88	12.26	18.1	8.17	7.07	19.04	10.68	15.34	30.96	31.82	42.95	44.94	51.59	45.69	42.48
tpd52l2b-DreEX0080785	0.58	1.03	0.84	0.34	1.23	0.87	1.21	2.19	1.45	3.64	3.92	4.94	5.32	6.95	20.87	8.08	20.46	36.07	33.51	36.59	36.47	44.78	40.33	47.01
trim62-DreEX0081285	17.24	11.95	8.27	11.24	9.91	11.11	12.79	18.52	2.44	6.9	7.25	2.86	7.94	4.17	10.2	3.03	NA	6.98	12.81	20	17.89	32.43	27.57	31.1
trioa-DreEX0081318	0	0.66	0.34	0	0.81	0.5	0	NA	0	1.96	4.05	0	1.59	4.29	14.58	6.46	10.2	13.97	39.57	51.16	70.29	56.03	75.36	72.28
wnk1b-DreEX0085368	NA	0	1.59	1.95	1.68	1.32	1.3	0	NA	0	0	1.08	0	0.62	10.43	4.05	10.14	16	9.78	17.65	15.14	18.64	12.35	10.19
zdhhc20a-DreEX0086286	NA	4.69	7.61	6.07	6.98	8.07	7.36	15.86	NA	NA	0	0	3.52	6.88	NA	6.28	NA	8.48	26.75	35.64	30.93	NA	45.79	64.92
zdhhc20b-DreEX0086292	0	8.76	8.54	9.23	8.09	8.77	6.33	10.11	12.88	14.13	21.82	34.65	19.21	13.96	20.55	21.52	17.56	51.18	32.83	30.03	40.68	60.92	50.14	62.56
zfyve21-DreEX0086466	0	0.25	0.14	0.14	0	0.11	0	0.26	0	0.56	0.71	2.86	4.38	6.7	8.91	7.5	10.65	15.15	22.54	28.43	22.29	36.96	30.33	30.99
zgc:91860-DreEX0087786	0	0	0	0	0	0	0	0	0.9	0	0	0	0	0	13.32	2.64	13.55	33.22	42.3	53.93	72.06	86.08	86.09	77.55

## Sheet: 1D
Conservation	≥51 nts	28-51 nts	≤27 nts
Neural regulated	113	53	114
No neural regulation	81	20	25
No coverage	15	3	7
No event ortholog	98	59	88
No gene ortholog	16	4	12

## Sheet: 1E
Zebrafish regulation	≥51 nts	28-51 nts	≤27 nts
dPSI ≥ -15	195	54	52
-15 < dPSI ≤ -25	79	41	48
-25 < dPSI ≤ -50	31	36	96
dPSI < -50	12	5	47

## Sheet: 1F
EventID	Length	Group_LE	Group_AS	dPSI_Srrm34
DreEX0000013	53	LONG	AS	-28.73
DreEX0000015	21	MIC	AS	-11.62
DreEX0000016	133	LONG	AS	-21.89
DreEX0000017	85	LONG	AS	-5.74
DreEX0000018	112	LONG	AS	-8.05
DreEX0000019	121	LONG	AS	3.61
DreEX0000047	24	MIC	MIC_Neural	-91.36
DreEX0000058	311	LONG	AS	16.85
DreEX0000059	314	LONG	LONG_Neural	-8.75
DreEX0000065	135	LONG	AS	0
DreEX0000067	33	MINI	AS	-2.64
DreEX0000206	114	LONG	AS	-14.96
DreEX0000232	129	LONG	AS	-12.7
DreEX0000235	129	LONG	AS	8.61
DreEX0000236	18	MIC	MIC_Neural	-27.33
DreEX0000238	27	MIC	AS	-16.67
DreEX0000301	123	LONG	LONG_Neural	-66.89
DreEX0000302	48	MINI	AS	-26.8
DreEX0000313	123	LONG	AS	9.51
DreEX0000317	48	MINI	AS	6.41
DreEX0000318	60	LONG	AS	-2.26
DreEX0000341	42	MINI	AS	-10.48
DreEX0000357	21	MIC	AS	-17.89
DreEX0000360	75	LONG	AS	14.91
DreEX0000431	183	LONG	AS	14.07
DreEX0000432	705	LONG	AS	-8.54
DreEX0000433	21	MIC	AS	-39.21
DreEX0000435	33	MINI	AS	-46.64
DreEX0000438	58	LONG	LONG_Neural	-17.31
DreEX0000439	197	LONG	AS	-11.13
DreEX0000440	1964	LONG	LONG_Neural	-7.78
DreEX0000445	27	MIC	AS	10.56
DreEX0000455	12	MIC	AS	-78.41
DreEX0000495	39	MINI	AS	0.53
DreEX0000507	6	MIC	AS	-17.69
DreEX0000534	183	LONG	AS	-10.01
DreEX0000602	18	MIC	MIC_Neural	-28.5
DreEX0000603	189	LONG	AS	-3.86
DreEX0000604	540	LONG	LONG_Neural	-33.17
DreEX0000619	57	LONG	AS	3.42
DreEX0000620	61	LONG	AS	7.48
DreEX0000662	88	LONG	AS	7.14
DreEX0000673	84	LONG	AS	-7.93
DreEX0000680	68	LONG	AS	-4.4
DreEX0000685	90	LONG	AS	-6.53
DreEX0000686	39	MINI	AS	-2.18
DreEX0000687	193	LONG	AS	21.18
DreEX0000699	9	MIC	AS	5.55
DreEX0000709	15	MIC	MIC_Neural	-69.94
DreEX0000717	24	MIC	MIC_Neural	-25.55
DreEX0000719	86	LONG	AS	-9.07
DreEX0000730	93	LONG	AS	-0.47
DreEX0000732	431	LONG	AS	-13.35
DreEX0000733	490	LONG	AS	-10.37
DreEX0000734	64	LONG	AS	-10.55
DreEX0000735	74	LONG	AS	1.42
DreEX0000737	188	LONG	AS	-7.42
DreEX0000739	134	LONG	AS	-2.44
DreEX0000763	60	LONG	AS	-25.45
DreEX0000787	366	LONG	AS	1.84
DreEX0000798	27	MIC	AS	-14.93
DreEX0000821	132	LONG	AS	-7.52
DreEX0000832	204	LONG	AS	-3.54
DreEX0000863	45	MINI	MINI_Neural	-31.25
DreEX0000913	95	LONG	AS	-6.77
DreEX0000928	162	LONG	AS	6.05
DreEX0000931	257	LONG	AS	-13.94
DreEX0000941	3	MIC	AS	-18.36
DreEX0000945	72	LONG	AS	-15.77
DreEX0000946	197	LONG	AS	-1.23
DreEX0000992	121	LONG	AS	-2.81
DreEX0001069	165	LONG	AS	-4.85
DreEX0001070	222	LONG	AS	-12.7
DreEX0001114	39	MINI	AS	-25.32
DreEX0001129	202	LONG	AS	22.22
DreEX0001130	176	LONG	AS	11.03
DreEX0001151	40	MINI	AS	-23.85
DreEX0001261	106	LONG	AS	-9.23
DreEX0001270	170	LONG	AS	13.7
DreEX0001281	76	LONG	AS	-1.37
DreEX0001282	133	LONG	AS	-0.74
DreEX0001283	207	LONG	AS	0.42
DreEX0001284	37	MINI	AS	-9.68
DreEX0001285	248	LONG	AS	-3.24
DreEX0001304	130	LONG	AS	-8.59
DreEX0001306	180	LONG	AS	-5.44
DreEX0001316	4352	LONG	AS	-13.93
DreEX0001344	155	LONG	AS	-12.9
DreEX0001397	49	MINI	AS	3.29
DreEX0001410	72	LONG	AS	-3.46
DreEX0001455	172	LONG	AS	5.87
DreEX0001510	118	LONG	AS	10.52
DreEX0001530	37	MINI	AS	-21.61
DreEX0001541	32	MINI	AS	-3.82
DreEX0001542	78	LONG	AS	-2.94
DreEX0001564	119	LONG	AS	0.8
DreEX0001587	75	LONG	LONG_Neural	6.88
DreEX0001620	99	LONG	AS	0
DreEX0001624	111	LONG	AS	-12.43
DreEX0001651	76	LONG	AS	-10.47
DreEX0001653	42	MINI	AS	-9.52
DreEX0001664	32	MINI	AS	-13.53
DreEX0001735	119	LONG	AS	-2.82
DreEX0001802	69	LONG	AS	3.03
DreEX0001803	618	LONG	AS	-6.37
DreEX0001831	69	LONG	AS	1.31
DreEX0001835	315	LONG	AS	-11.41
DreEX0001895	87	LONG	AS	0
DreEX0001909	166	LONG	AS	-33.09
DreEX0001976	45	MINI	AS	0
DreEX0001980	309	LONG	AS	9.78
DreEX0001982	315	LONG	AS	9.6
DreEX0001983	117	LONG	AS	22.91
DreEX0001984	312	LONG	AS	6.81
DreEX0001987	92	LONG	AS	-5.96
DreEX0001988	92	LONG	AS	17.04
DreEX0001996	14	MIC	AS	-12.5
DreEX0002017	1629	LONG	AS	-1.95
DreEX0002030	152	LONG	AS	4.73
DreEX0002044	45	MINI	AS	0
DreEX0002052	37	MINI	AS	-11.07
DreEX0002080	69	LONG	AS	3.66
DreEX0002081	54	LONG	AS	-4.06
DreEX0002127	27	MIC	AS	-8.28
DreEX0002147	75	LONG	AS	-16.68
DreEX0002166	104	LONG	AS	0
DreEX0002173	9	MIC	AS	2.64
DreEX0002174	12	MIC	MIC_Neural	-20.02
DreEX0002175	15	MIC	MIC_Neural	-71.58
DreEX0002232	57	LONG	AS	-8.65
DreEX0002234	73	LONG	LONG_Neural	-4
DreEX0002236	64	LONG	AS	-3.84
DreEX0002237	131	LONG	AS	0
DreEX0002238	133	LONG	AS	-10.41
DreEX0002279	18	MIC	AS	-16.57
DreEX0002290	51	MINI	AS	-10.51
DreEX0002295	33	MINI	MINI_Neural	-16.64
DreEX0002298	48	MINI	AS	-37.39
DreEX0002318	719	LONG	LONG_Neural	-1
DreEX0002323	111	LONG	AS	-25.16
DreEX0002325	231	LONG	AS	-13.77
DreEX0002326	27	MIC	AS	-18.26
DreEX0002327	105	LONG	AS	-35.81
DreEX0002344	42	MINI	MINI_Neural	-16.84
DreEX0002346	72	LONG	AS	-12.56
DreEX0002354	54	LONG	AS	0.65
DreEX0002422	111	LONG	AS	19.53
DreEX0002474	108	LONG	AS	0.54
DreEX0002543	51	MINI	AS	-0.63
DreEX0002564	47	MINI	AS	16.29
DreEX0002612	11	MIC	AS	-35.39
DreEX0002642	17	MIC	MIC_Neural	-21.03
DreEX0002678	39	MINI	AS	-8.99
DreEX0002679	132	LONG	AS	-5.37
DreEX0002691	130	LONG	AS	2.95
DreEX0002786	24	MIC	MIC_Neural	-8.62
DreEX0002789	42	MINI	AS	-3.74
DreEX0002806	24	MIC	AS	-26.82
DreEX0002808	108	LONG	LONG_Neural	-9.71
DreEX0002809	60	LONG	AS	-7.4
DreEX0002815	78	LONG	LONG_Neural	-26.05
DreEX0002835	105	LONG	AS	-5.25
DreEX0002855	54	LONG	LONG_Neural	-11.62
DreEX0002873	111	LONG	AS	-7.47
DreEX0002881	151	LONG	AS	-1.97
DreEX0002893	72	LONG	LONG_Neural	-10.95
DreEX0002908	457	LONG	AS	9.29
DreEX0002920	163	LONG	AS	0
DreEX0002930	96	LONG	AS	1.3
DreEX0002939	72	LONG	AS	-1.32
DreEX0002940	36	MINI	AS	-14.84
DreEX0002942	87	LONG	AS	-16.87
DreEX0002943	78	LONG	AS	-2.82
DreEX0002948	42	MINI	AS	-30.19
DreEX0002949	63	LONG	AS	-6.86
DreEX0002964	66	LONG	LONG_Neural	-1.7
DreEX0002983	54	LONG	AS	-22.19
DreEX0002989	36	MINI	AS	1.27
DreEX0003079	51	MINI	MINI_Neural	-24
DreEX0003080	24	MIC	MIC_Neural	-59.59
DreEX0003085	24	MIC	AS	-45.69
DreEX0003093	15	MIC	AS	-26.99
DreEX0003169	9	MIC	AS	-41.77
DreEX0003171	36	MINI	AS	-5.3
DreEX0003172	99	LONG	LONG_Neural	-23.59
DreEX0003174	24	MIC	AS	8.66
DreEX0003183	2895	LONG	AS	-7.51
DreEX0003186	814	LONG	AS	14.62
DreEX0003221	159	LONG	AS	18.5
DreEX0003281	42	MINI	AS	0
DreEX0003301	95	LONG	AS	-1.71
DreEX0003340	438	LONG	AS	1.4
DreEX0003370	95	LONG	AS	0
DreEX0003373	76	LONG	AS	2.27
DreEX0003379	162	LONG	AS	7.86
DreEX0003405	233	LONG	AS	-24.54
DreEX0003413	129	LONG	AS	0
DreEX0003448	27	MIC	AS	-10.9
DreEX0003450	148	LONG	AS	7.62
DreEX0003469	149	LONG	AS	-2.4
DreEX0003483	17	MIC	MIC_Neural	-24.31
DreEX0003515	109	LONG	AS	4.93
DreEX0003526	542	LONG	AS	2.25
DreEX0003530	129	LONG	LONG_Neural	-14.5
DreEX0003540	87	LONG	AS	4.71
DreEX0003566	21	MIC	AS	-20.64
DreEX0003577	63	LONG	LONG_Neural	-21.34
DreEX0003578	75	LONG	AS	-4.65
DreEX0003598	156	LONG	AS	-1.9
DreEX0003622	57	LONG	AS	-0.34
DreEX0003724	139	LONG	AS	-4.1
DreEX0003738	61	LONG	AS	-50
DreEX0003765	803	LONG	AS	-4.07
DreEX0003819	196	LONG	AS	2.41
DreEX0003829	154	LONG	AS	-38.41
DreEX0003830	131	LONG	AS	-25.29
DreEX0003831	103	LONG	AS	-18.05
DreEX0003839	165	LONG	AS	-0.79
DreEX0003923	24	MIC	AS	-6.06
DreEX0003933	21	MIC	AS	-22.36
DreEX0003943	36	MINI	AS	6.92
DreEX0003945	1218	LONG	AS	-6.27
DreEX0003946	51	MINI	AS	-3.02
DreEX0003952	98	LONG	AS	0
DreEX0003957	75	LONG	LONG_Neural	-7.89
DreEX0003958	36	MINI	MINI_Neural	-16.13
DreEX0003959	60	LONG	AS	0.47
DreEX0003960	159	LONG	AS	-1.1
DreEX0003962	54	LONG	AS	-17.55
DreEX0003964	450	LONG	AS	1.15
DreEX0003980	155	LONG	AS	-5.34
DreEX0004027	12	MIC	MIC_Neural	-27.08
DreEX0004028	84	LONG	AS	-0.15
DreEX0004029	33	MINI	MINI_Neural	-10.02
DreEX0004039	102	LONG	AS	-5.09
DreEX0004040	57	LONG	LONG_Neural	-21.97
DreEX0004054	141	LONG	AS	0
DreEX0004060	33	MINI	AS	2.38
DreEX0004103	115	LONG	AS	-0.22
DreEX0004105	39	MINI	AS	-18.71
DreEX0004109	138	LONG	AS	-10.71
DreEX0004142	98	LONG	AS	-9.14
DreEX0004217	66	LONG	AS	-36.05
DreEX0004221	39	MINI	AS	1.74
DreEX0004222	66	LONG	AS	-3.57
DreEX0004225	105	LONG	AS	-3.39
DreEX0004243	124	LONG	AS	-6.91
DreEX0004279	28	MINI	AS	-36.84
DreEX0004281	81	LONG	AS	-0.2
DreEX0004311	33	MINI	MINI_Neural	-18.63
DreEX0004329	84	LONG	AS	-19.45
DreEX0004381	99	LONG	AS	0
DreEX0004431	81	LONG	AS	0.41
DreEX0004495	117	LONG	AS	4.2
DreEX0004500	57	LONG	AS	-6.2
DreEX0004501	327	LONG	AS	2.31
DreEX0004502	66	LONG	AS	-30.49
DreEX0004503	111	LONG	AS	-3.76
DreEX0004513	47	MINI	AS	0
DreEX0004568	96	LONG	AS	-12.89
DreEX0004569	156	LONG	AS	-24.73
DreEX0004583	73	LONG	AS	-2.25
DreEX0004589	787	LONG	AS	2.26
DreEX0004603	35	MINI	AS	0.17
DreEX0004630	83	LONG	AS	-6.52
DreEX0004632	51	MINI	AS	-66.67
DreEX0004660	66	LONG	AS	-14.31
DreEX0004697	73	LONG	AS	-17.48
DreEX0004714	87	LONG	AS	-29.75
DreEX0004715	74	LONG	AS	-25.84
DreEX0004722	107	LONG	AS	-23.58
DreEX0004723	78	LONG	AS	-20.25
DreEX0004724	80	LONG	AS	-25.49
DreEX0004725	138	LONG	AS	-7.32
DreEX0004726	110	LONG	AS	-5.89
DreEX0004728	18	MIC	MIC_Neural	-31.46
DreEX0004776	105	LONG	AS	0.9
DreEX0004821	134	LONG	AS	10.53
DreEX0004822	244	LONG	AS	10.53
DreEX0004829	12	MIC	AS	-10.61
DreEX0004830	33	MINI	AS	-5.07
DreEX0004954	122	LONG	AS	-12.84
DreEX0004960	103	LONG	AS	6.21
DreEX0004961	50	MINI	AS	-4.13
DreEX0004989	89	LONG	AS	0
DreEX0004997	194	LONG	AS	-5.69
DreEX0005004	74	LONG	AS	-2.99
DreEX0005005	102	LONG	AS	-2.71
DreEX0005145	57	LONG	AS	-5.23
DreEX0005146	48	MINI	AS	-5.96
DreEX0005161	45	MINI	AS	-7.79
DreEX0005174	18	MIC	AS	-8.85
DreEX0005212	30	MINI	AS	-14.26
DreEX0005215	50	MINI	AS	5.11
DreEX0005259	150	LONG	AS	-0.28
DreEX0005306	181	LONG	AS	-6.06
DreEX0005318	48	MINI	AS	-2.73
DreEX0005328	12	MIC	AS	-20.93
DreEX0005351	135	LONG	AS	-13.22
DreEX0005353	111	LONG	AS	-1.44
DreEX0005387	39	MINI	MINI_Neural	-8.53
DreEX0005394	84	LONG	AS	-9.74
DreEX0005416	106	LONG	AS	-7.16
DreEX0005431	139	LONG	AS	-5.54
DreEX0005484	261	LONG	AS	6.32
DreEX0005506	64	LONG	AS	-11.11
DreEX0005508	27	MIC	AS	-22.9
DreEX0005538	184	LONG	AS	-17.82
DreEX0005588	30	MINI	MINI_Neural	-2.3
DreEX0005659	39	MINI	AS	-37.11
DreEX0005673	123	LONG	AS	-0.76
DreEX0005705	111	LONG	AS	-10.9
DreEX0005706	129	LONG	AS	-5.97
DreEX0005712	89	LONG	AS	16.04
DreEX0005714	36	MINI	AS	-24.22
DreEX0005756	1071	LONG	AS	-5.79
DreEX0005758	54	LONG	AS	0
DreEX0005763	1161	LONG	AS	10.12
DreEX0005764	142	LONG	AS	-1.06
DreEX0005765	57	LONG	AS	2.1
DreEX0005766	210	LONG	LONG_Neural	-0.49
DreEX0005769	66	LONG	AS	-1.31
DreEX0005770	93	LONG	LONG_Neural	7.34
DreEX0005782	228	LONG	AS	1.83
DreEX0005799	99	LONG	AS	-9.1
DreEX0005800	102	LONG	AS	-1.44
DreEX0005820	83	LONG	LONG_Neural	-23.18
DreEX0005821	40	MINI	AS	-12.75
DreEX0005831	63	LONG	AS	-17.75
DreEX0005859	39	MINI	AS	-22.87
DreEX0005881	132	LONG	AS	0
DreEX0005889	129	LONG	AS	-14.63
DreEX0005892	129	LONG	AS	10.66
DreEX0005896	129	LONG	AS	26.2
DreEX0005899	199	LONG	AS	0
DreEX0005922	66	LONG	AS	-19.1
DreEX0005927	35	MINI	AS	-14.8
DreEX0005937	221	LONG	AS	10.89
DreEX0005964	42	MINI	AS	-13.37
DreEX0005965	96	LONG	LONG_Neural	-6.83
DreEX0005986	72	LONG	AS	-4.24
DreEX0005989	126	LONG	AS	-5.17
DreEX0005991	574	LONG	AS	35.25
DreEX0005996	45	MINI	AS	-4.08
DreEX0006006	136	LONG	AS	14.29
DreEX0006007	140	LONG	AS	0
DreEX0006036	286	LONG	AS	-4.21
DreEX0006037	859	LONG	AS	-8.56
DreEX0006077	74	LONG	AS	-16.21
DreEX0006078	96	LONG	AS	-11.94
DreEX0006090	228	LONG	LONG_Neural	-10.04
DreEX0006108	9	MIC	AS	-14.32
DreEX0006109	150	LONG	AS	-5.13
DreEX0006132	117	LONG	AS	0
DreEX0006155	48	MINI	AS	-3.69
DreEX0006156	62	LONG	AS	-16.69
DreEX0006157	93	LONG	AS	-1.12
DreEX0006158	114	LONG	AS	-7.72
DreEX0006199	111	LONG	AS	-17.94
DreEX0006201	3	MIC	AS	-9.84
DreEX0006220	60	LONG	LONG_Neural	-15.08
DreEX0006233	240	LONG	AS	-4.53
DreEX0006256	24	MIC	MIC_Neural	-28.28
DreEX0006265	9	MIC	AS	-6.66
DreEX0006266	66	LONG	LONG_Neural	-12.97
DreEX0006344	138	LONG	AS	1
DreEX0006362	184	LONG	AS	0
DreEX0006377	217	LONG	LONG_Neural	-1.79
DreEX0006405	41	MINI	AS	-23.47
DreEX0006419	93	LONG	AS	-1.23
DreEX0006423	129	LONG	LONG_Neural	-1.47
DreEX0006437	181	LONG	AS	0
DreEX0006493	81	LONG	AS	-32.73
DreEX0006587	57	LONG	AS	-16.69
DreEX0006605	54	LONG	AS	-8.48
DreEX0006607	129	LONG	AS	-7.7
DreEX0006612	91	LONG	AS	0.58
DreEX0006613	144	LONG	AS	-3.62
DreEX0006614	189	LONG	AS	3.32
DreEX0006658	270	LONG	AS	13.79
DreEX0006659	285	LONG	AS	0
DreEX0006706	138	LONG	LONG_Neural	-9.98
DreEX0006710	75	LONG	AS	0.67
DreEX0006715	23	MIC	AS	-8.92
DreEX0006800	147	LONG	AS	-6.35
DreEX0006944	45	MINI	AS	0
DreEX0006952	174	LONG	AS	-0.91
DreEX0006965	147	LONG	AS	1.29
DreEX0006993	155	LONG	AS	-2.04
DreEX0006994	152	LONG	AS	-12.95
DreEX0007027	60	LONG	AS	-24.06
DreEX0007028	33	MINI	AS	-25.06
DreEX0007029	93	LONG	AS	-20.33
DreEX0007032	84	LONG	AS	-10.48
DreEX0007037	54	LONG	AS	1.25
DreEX0007050	78	LONG	AS	-10.53
DreEX0007052	51	MINI	MINI_Neural	-25.5
DreEX0007068	172	LONG	LONG_Neural	-16.26
DreEX0007085	30	MINI	MINI_Neural	-5.04
DreEX0007099	39	MINI	AS	-6.44
DreEX0007151	140	LONG	AS	3.58
DreEX0007164	46	MINI	AS	-27.2
DreEX0007195	1221	LONG	AS	-3.93
DreEX0007196	267	LONG	AS	0.62
DreEX0007197	387	LONG	AS	0.64
DreEX0007212	102	LONG	LONG_Neural	-2.38
DreEX0007217	54	LONG	LONG_Neural	0.88
DreEX0007230	90	LONG	AS	1.84
DreEX0007232	80	LONG	AS	5.77
DreEX0007262	38	MINI	AS	-13.7
DreEX0007265	36	MINI	AS	-11.24
DreEX0007286	36	MINI	AS	-7.99
DreEX0007292	147	LONG	AS	-5.18
DreEX0007355	93	LONG	AS	-8.54
DreEX0007400	74	LONG	AS	-3.77
DreEX0007420	282	LONG	AS	9.08
DreEX0007422	162	LONG	AS	-2.78
DreEX0007444	6	MIC	MIC_Neural	-23.39
DreEX0007465	48	MINI	AS	-21.26
DreEX0007470	39	MINI	AS	-0.85
DreEX0007502	30	MINI	MINI_Neural	-3.86
DreEX0007503	144	LONG	AS	0
DreEX0007508	129	LONG	AS	-6.35
DreEX0007509	126	LONG	AS	-5.98
DreEX0007513	21	MIC	AS	2.42
DreEX0007514	178	LONG	AS	19.65
DreEX0007535	118	LONG	AS	-44.14
DreEX0007550	35	MINI	AS	-7.88
DreEX0007622	81	LONG	AS	-6.84
DreEX0007654	9	MIC	MIC_Neural	-50.54
DreEX0007703	78	LONG	LONG_Neural	-12.98
DreEX0007757	76	LONG	AS	-0.93
DreEX0007758	122	LONG	AS	-9.72
DreEX0007764	12	MIC	MIC_Neural	-44.36
DreEX0007770	57	LONG	AS	3.76
DreEX0007797	71	LONG	AS	-22.83
DreEX0007823	100	LONG	AS	-53
DreEX0007832	274	LONG	AS	12.07
DreEX0007893	102	LONG	AS	-8.33
DreEX0007894	18	MIC	AS	-70.23
DreEX0007897	233	LONG	AS	-2.87
DreEX0007898	102	LONG	LONG_Neural	-20.25
DreEX0007899	18	MIC	AS	-40.32
DreEX0007903	60	LONG	AS	-13.72
DreEX0007908	64	LONG	AS	0
DreEX0007914	41	MINI	AS	-11.71
DreEX0007929	202	LONG	AS	-4.14
DreEX0007957	48	MINI	AS	1.57
DreEX0008011	51	MINI	AS	-5.68
DreEX0008012	15	MIC	AS	-21.25
DreEX0008013	39	MINI	AS	-2.47
DreEX0008053	108	LONG	AS	-17.3
DreEX0008059	96	LONG	LONG_Neural	-9.11
DreEX0008108	35	MINI	AS	11.03
DreEX0008110	124	LONG	AS	0
DreEX0008152	137	LONG	AS	-1.29
DreEX0008185	126	LONG	AS	3.77
DreEX0008261	12	MIC	MIC_Neural	-35.92
DreEX0008273	27	MIC	AS	-10.63
DreEX0008277	65	LONG	AS	-12.12
DreEX0008316	12	MIC	AS	-13.69
DreEX0008317	15	MIC	AS	-45.48
DreEX0008318	3	MIC	AS	-5.83
DreEX0008319	63	LONG	LONG_Neural	-10.84
DreEX0008356	42	MINI	AS	-11.52
DreEX0008380	162	LONG	AS	-6.75
DreEX0008394	21	MIC	AS	-38.91
DreEX0008395	99	LONG	AS	-8.03
DreEX0008398	30	MINI	AS	-9.67
DreEX0008419	84	LONG	AS	-1.08
DreEX0008476	84	LONG	AS	8.3
DreEX0008538	171	LONG	AS	-23.24
DreEX0008539	96	LONG	AS	-10.38
DreEX0008561	73	LONG	AS	-4.5
DreEX0008567	513	LONG	AS	-5.06
DreEX0008574	117	LONG	AS	-0.75
DreEX0008579	498	LONG	AS	2.96
DreEX0008580	60	LONG	AS	-6.37
DreEX0008581	1152	LONG	AS	2.98
DreEX0008596	48	MINI	AS	6.96
DreEX0008600	48	MINI	AS	-28.27
DreEX0008601	66	LONG	AS	0.77
DreEX0008613	9	MIC	MIC_Neural	-32.03
DreEX0008614	273	LONG	AS	7.09
DreEX0008618	135	LONG	AS	-2.27
DreEX0008656	30	MINI	MINI_Neural	-20.91
DreEX0008661	33	MINI	AS	-13.84
DreEX0008667	220	LONG	AS	-3.32
DreEX0008706	42	MINI	AS	2.38
DreEX0008711	51	MINI	AS	-27.38
DreEX0008718	49	MINI	AS	-5.19
DreEX0008722	110	LONG	AS	-5.04
DreEX0008750	210	LONG	AS	11.04
DreEX0008758	123	LONG	AS	-2.89
DreEX0008759	24	MIC	AS	-25.88
DreEX0008769	45	MINI	AS	-25.73
DreEX0008804	114	LONG	AS	0
DreEX0008814	304	LONG	AS	-0.5
DreEX0008827	191	LONG	AS	-4.28
DreEX0008875	57	LONG	AS	13.04
DreEX0008881	138	LONG	AS	-10.67
DreEX0008940	273	LONG	AS	-11
DreEX0008947	85	LONG	AS	-2.58
DreEX0008952	82	LONG	AS	-1.27
DreEX0008971	21	MIC	MIC_Neural	-24.89
DreEX0008989	66	LONG	AS	-5.04
DreEX0008990	60	LONG	AS	-11.88
DreEX0009000	169	LONG	LONG_Neural	-17.02
DreEX0009002	385	LONG	AS	-1.12
DreEX0009008	79	LONG	AS	-4.97
DreEX0009025	42	MINI	AS	-5.47
DreEX0009046	84	LONG	AS	-16.9
DreEX0009049	27	MIC	MIC_Neural	-9.57
DreEX0009063	45	MINI	AS	-29.82
DreEX0009092	129	LONG	AS	-1.19
DreEX0009095	88	LONG	AS	14.67
DreEX0009114	57	LONG	AS	-19.41
DreEX0009170	86	LONG	AS	-7.34
DreEX0009173	135	LONG	AS	0.53
DreEX0009174	177	LONG	AS	5.17
DreEX0009189	81	LONG	AS	-5.58
DreEX0009250	6	MIC	AS	-53
DreEX0009251	120	LONG	AS	11.6
DreEX0009252	71	LONG	AS	-10.46
DreEX0009254	57	LONG	AS	-28.78
DreEX0009255	30	MINI	AS	-5.72
DreEX0009263	9995	LONG	LONG_Neural	-5.55
DreEX0009264	42	MINI	AS	-28.24
DreEX0009265	57	LONG	LONG_Neural	-17.69
DreEX0009269	23	MIC	MIC_Neural	4.74
DreEX0009271	30	MINI	MINI_Neural	-31.92
DreEX0009276	57	LONG	AS	3.56
DreEX0009287	39	MINI	MINI_Neural	-15.57
DreEX0009360	60	LONG	AS	-7.95
DreEX0009361	105	LONG	AS	-2.21
DreEX0009368	63	LONG	LONG_Neural	-68.32
DreEX0009376	12	MIC	AS	-10.22
DreEX0009377	36	MINI	AS	-15.31
DreEX0009411	105	LONG	AS	10.53
DreEX0009441	63	LONG	AS	-5.88
DreEX0009489	39	MINI	AS	-2.69
DreEX0009490	435	LONG	AS	-11.85
DreEX0009493	54	LONG	AS	-5.15
DreEX0009502	65	LONG	AS	0
DreEX0009508	212	LONG	AS	0.84
DreEX0009604	35	MINI	AS	1.31
DreEX0009606	37	MINI	AS	-1.35
DreEX0009608	93	LONG	AS	11.56
DreEX0009615	125	LONG	AS	-3.39
DreEX0009634	225	LONG	LONG_Neural	-22.9
DreEX0009644	60	LONG	AS	-8.43
DreEX0009656	129	LONG	AS	-55.56
DreEX0009667	366	LONG	AS	-3.76
DreEX0009677	78	LONG	AS	-0.95
DreEX0009688	1435	LONG	AS	-0.87
DreEX0009691	325	LONG	AS	0.03
DreEX0009700	64	LONG	AS	-4.44
DreEX0009707	51	MINI	AS	-1.45
DreEX0009712	66	LONG	AS	-12.87
DreEX0009713	107	LONG	AS	-12.36
DreEX0009756	69	LONG	AS	1.64
DreEX0009757	54	LONG	AS	-11.21
DreEX0009764	333	LONG	AS	3.84
DreEX0009773	300	LONG	LONG_Neural	-16.34
DreEX0009789	50	MINI	AS	-10.95
DreEX0009792	71	LONG	AS	-0.23
DreEX0009819	12	MIC	AS	-26.42
DreEX0009822	242	LONG	AS	-2.19
DreEX0009826	147	LONG	AS	-4.22
DreEX0009827	79	LONG	AS	-3.96
DreEX0009828	128	LONG	AS	-2.67
DreEX0009829	152	LONG	AS	-2.52
DreEX0009830	123	LONG	AS	-2.92
DreEX0009913	3	MIC	AS	-18.45
DreEX0009924	20	MIC	AS	-5.78
DreEX0009945	66	LONG	AS	-18.67
DreEX0010093	81	LONG	AS	-45.26
DreEX0010094	63	LONG	AS	-18.57
DreEX0010113	3	MIC	AS	0.44
DreEX0010128	182	LONG	AS	-2.46
DreEX0010129	39	MINI	MINI_Neural	-15.75
DreEX0010130	36	MINI	MINI_Neural	-20.89
DreEX0010222	125	LONG	AS	-7.86
DreEX0010281	102	LONG	AS	3.66
DreEX0010301	15	MIC	MIC_Neural	-22.43
DreEX0010305	102	LONG	AS	-8.1
DreEX0010306	195	LONG	LONG_Neural	-18.98
DreEX0010307	87	LONG	LONG_Neural	-16.88
DreEX0010315	15	MIC	AS	-53.99
DreEX0010320	18	MIC	MIC_Neural	-20.62
DreEX0010321	225	LONG	AS	0.08
DreEX0010323	87	LONG	AS	-7.16
DreEX0010329	18	MIC	MIC_Neural	-55.42
DreEX0010330	147	LONG	AS	-7.97
DreEX0010331	234	LONG	LONG_Neural	-12.25
DreEX0010332	87	LONG	AS	-4.37
DreEX0010339	132	LONG	LONG_Neural	-23.58
DreEX0010340	96	LONG	LONG_Neural	-28.57
DreEX0010349	75	LONG	AS	-5.51
DreEX0010357	72	LONG	AS	-12.87
DreEX0010358	75	LONG	AS	-3.05
DreEX0010359	201	LONG	AS	-3.89
DreEX0010360	168	LONG	AS	-12.32
DreEX0010361	66	LONG	AS	-7.7
DreEX0010373	57	LONG	AS	-12.93
DreEX0010374	81	LONG	AS	-7.62
DreEX0010377	129	LONG	AS	-38.92
DreEX0010378	84	LONG	LONG_Neural	-20.66
DreEX0010379	156	LONG	AS	13.99
DreEX0010381	123	LONG	AS	-0.48
DreEX0010385	15	MIC	AS	-20
DreEX0010386	93	LONG	LONG_Neural	-10.32
DreEX0010387	93	LONG	LONG_Neural	-22.46
DreEX0010389	141	LONG	AS	-1.74
DreEX0010395	159	LONG	AS	0
DreEX0010396	45	MINI	AS	-9.55
DreEX0010397	39	MINI	AS	-3.35
DreEX0010399	60	LONG	AS	-14.03
DreEX0010402	3	MIC	AS	-20.15
DreEX0010405	33	MINI	AS	-2.83
DreEX0010406	219	LONG	AS	-7
DreEX0010407	81	LONG	AS	-5.75
DreEX0010408	54	LONG	AS	-27.32
DreEX0010411	99	LONG	AS	-9.03
DreEX0010412	51	MINI	MINI_Neural	-17.94
DreEX0010421	156	LONG	AS	-26.26
DreEX0010422	30	MINI	AS	-3.99
DreEX0010442	58	LONG	AS	0
DreEX0010461	105	LONG	AS	-7.16
DreEX0010482	42	MINI	AS	-5.06
DreEX0010483	24	MIC	AS	-11.64
DreEX0010543	114	LONG	AS	-0.79
DreEX0010600	33	MINI	AS	-51.02
DreEX0010657	937	LONG	AS	-5.78
DreEX0010664	1173	LONG	AS	-6.81
DreEX0010676	182	LONG	AS	-0.6
DreEX0010691	45	MINI	AS	-1.2
DreEX0010719	132	LONG	AS	0
DreEX0010726	15	MIC	MIC_Neural	-75
DreEX0010736	27	MIC	AS	10.1
DreEX0010747	161	LONG	AS	-0.3
DreEX0010748	161	LONG	AS	-7.62
DreEX0010759	102	LONG	AS	1.34
DreEX0010762	114	LONG	AS	-7.5
DreEX0010763	114	LONG	AS	-3.16
DreEX0010800	78	LONG	AS	-19.87
DreEX0010810	78	LONG	AS	-13.19
DreEX0010858	128	LONG	AS	-5.72
DreEX0010877	48	MINI	AS	14.09
DreEX0010932	81	LONG	AS	-3.81
DreEX0010933	66	LONG	AS	-1.35
DreEX0010934	86	LONG	AS	-4.33
DreEX0010935	86	LONG	LONG_Neural	-1.62
DreEX0010940	21	MIC	AS	-53.96
DreEX0010941	78	LONG	AS	-29.39
DreEX0010942	66	LONG	AS	-0.7
DreEX0010947	79	LONG	AS	16.55
DreEX0010948	76	LONG	AS	-44.57
DreEX0010950	86	LONG	AS	-53.98
DreEX0010951	86	LONG	AS	18.8
DreEX0011037	24	MIC	MIC_Neural	-14.99
DreEX0011048	94	LONG	AS	1.52
DreEX0011106	51	MINI	AS	-35.01
DreEX0011107	69	LONG	AS	4.04
DreEX0011108	81	LONG	AS	4.5
DreEX0011109	69	LONG	AS	-4.42
DreEX0011114	40	MINI	MINI_Neural	-9.58
DreEX0011156	25	MIC	AS	-5.28
DreEX0011165	218	LONG	AS	0
DreEX0011166	91	LONG	AS	-6.84
DreEX0011167	91	LONG	AS	-0.81
DreEX0011168	192	LONG	AS	7.8
DreEX0011204	75	LONG	AS	-10.26
DreEX0011240	101	LONG	AS	-7.07
DreEX0011341	41	MINI	AS	1.66
DreEX0011358	69	LONG	AS	7.62
DreEX0011361	73	LONG	AS	-13.48
DreEX0011403	159	LONG	AS	0
DreEX0011418	162	LONG	AS	-4.7
DreEX0011470	60	LONG	AS	-4.17
DreEX0011476	198	LONG	AS	-10.86
DreEX0011488	105	LONG	AS	-7.14
DreEX0011500	84	LONG	AS	-15.47
DreEX0011514	34	MINI	MINI_Neural	-21.47
DreEX0011515	219	LONG	AS	-0.71
DreEX0011516	18	MIC	AS	-2.5
DreEX0011517	84	LONG	AS	-3.62
DreEX0011522	72	LONG	AS	-3.94
DreEX0011530	18	MIC	AS	-4.9
DreEX0011532	161	LONG	AS	3.58
DreEX0011534	81	LONG	AS	-14.95
DreEX0011536	92	LONG	AS	4.65
DreEX0011571	75	LONG	AS	-7.41
DreEX0011572	105	LONG	AS	-10.21
DreEX0011573	168	LONG	AS	-10.98
DreEX0011575	36	MINI	AS	-10.7
DreEX0011580	99	LONG	AS	6.82
DreEX0011593	435	LONG	AS	-5.74
DreEX0011594	99	LONG	AS	-13.35
DreEX0011599	162	LONG	AS	-22.44
DreEX0011602	96	LONG	AS	-9.88
DreEX0011603	111	LONG	AS	-5.73
DreEX0011606	105	LONG	AS	-18.46
DreEX0011626	153	LONG	AS	39.41
DreEX0011636	42	MINI	AS	-1.99
DreEX0011638	39	MINI	AS	-8.92
DreEX0011639	69	LONG	AS	19.09
DreEX0011640	60	LONG	AS	3.52
DreEX0011641	90	LONG	AS	-5.4
DreEX0011642	36	MINI	AS	11.54
DreEX0011643	42	MINI	AS	2.91
DreEX0011650	45	MINI	AS	-9.49
DreEX0011651	27	MIC	AS	-13.51
DreEX0011652	129	LONG	AS	-6.24
DreEX0011653	39	MINI	AS	-2.31
DreEX0011656	15	MIC	MIC_Neural	-33.67
DreEX0011657	18	MIC	MIC_Neural	-19.73
DreEX0011665	39	MINI	MINI_Neural	-14.71
DreEX0011677	15	MIC	MIC_Neural	-22.01
DreEX0011680	39	MINI	MINI_Neural	-37.21
DreEX0011687	18	MIC	MIC_Neural	-32.17
DreEX0011705	168	LONG	AS	0
DreEX0011706	184	LONG	AS	0
DreEX0011732	21	MIC	AS	-37.97
DreEX0011734	179	LONG	AS	0
DreEX0011748	3	MIC	AS	-38.1
DreEX0011820	101	LONG	AS	-8.46
DreEX0011831	39	MINI	AS	-18.51
DreEX0011883	225	LONG	AS	-12.9
DreEX0011909	84	LONG	AS	-2.82
DreEX0011930	197	LONG	AS	-5.13
DreEX0011931	127	LONG	AS	-1.96
DreEX0011950	84	LONG	AS	-13.73
DreEX0011964	15	MIC	AS	-17.37
DreEX0011966	75	LONG	AS	-13.64
DreEX0011974	60	LONG	LONG_Neural	-54.23
DreEX0012015	120	LONG	AS	-10.16
DreEX0012020	117	LONG	AS	4.86
DreEX0012026	21	MIC	AS	-11.28
DreEX0012027	67	LONG	AS	-7.67
DreEX0012028	469	LONG	AS	-4.35
DreEX0012035	124	LONG	AS	10.47
DreEX0012036	124	LONG	AS	-14.29
DreEX0012063	39	MINI	AS	-8.47
DreEX0012093	103	LONG	AS	-22.12
DreEX0012123	94	LONG	AS	-2.41
DreEX0012142	12	MIC	MIC_Neural	-21.72
DreEX0012143	21	MIC	MIC_Neural	3
DreEX0012156	327	LONG	AS	-1.21
DreEX0012183	93	LONG	AS	0
DreEX0012225	35	MINI	AS	-10.29
DreEX0012253	113	LONG	AS	-6.98
DreEX0012256	40	MINI	AS	-7.47
DreEX0012289	24	MIC	AS	-12.3
DreEX0012290	321	LONG	AS	-2.06
DreEX0012291	60	LONG	AS	-3.38
DreEX0012340	6	MIC	AS	-6.5
DreEX0012376	106	LONG	AS	11.07
DreEX0012381	95	LONG	AS	15.77
DreEX0012382	111	LONG	AS	15.77
DreEX0012383	84	LONG	AS	19.51
DreEX0012384	89	LONG	AS	13.68
DreEX0012385	91	LONG	AS	12.08
DreEX0012386	72	LONG	AS	14.65
DreEX0012387	150	LONG	AS	10.27
DreEX0012452	36	MINI	AS	-13.65
DreEX0012460	496	LONG	AS	-2.14
DreEX0012468	87	LONG	AS	-22.71
DreEX0012469	45	MINI	AS	-9.11
DreEX0012493	95	LONG	AS	-11.35
DreEX0012525	88	LONG	AS	-0.29
DreEX0012571	27	MIC	AS	2.59
DreEX0012577	30	MINI	AS	0.64
DreEX0012711	133	LONG	AS	0
DreEX0012730	37	MINI	AS	-11.94
DreEX0012749	45	MINI	AS	-7.18
DreEX0012755	80	LONG	AS	-11.44
DreEX0012785	37	MINI	AS	-8.07
DreEX0012813	116	LONG	AS	-25.96
DreEX0012821	87	LONG	AS	0
DreEX0012855	51	MINI	AS	5.51
DreEX0012858	24	MIC	MIC_Neural	-6.36
DreEX0012883	87	LONG	AS	-6.36
DreEX0012949	9	MIC	AS	-8.19
DreEX0012950	3	MIC	AS	-6.12
DreEX0012956	178	LONG	AS	-10.35
DreEX0012964	33	MINI	AS	-27.16
DreEX0012967	9	MIC	AS	-15.28
DreEX0012968	165	LONG	AS	6.23
DreEX0012969	54	LONG	AS	0.15
DreEX0012970	48	MINI	AS	-5.57
DreEX0012971	54	LONG	AS	5.53
DreEX0012972	42	MINI	AS	6.92
DreEX0012973	231	LONG	AS	-0.97
DreEX0013071	144	LONG	AS	-1.01
DreEX0013072	101	LONG	AS	-16.96
DreEX0013077	21	MIC	AS	5.42
DreEX0013086	12	MIC	MIC_Neural	-75.04
DreEX0013088	92	LONG	AS	0.34
DreEX0013090	99	LONG	LONG_Neural	-20.36
DreEX0013091	36	MINI	MINI_Neural	-25.23
DreEX0013093	24	MIC	AS	-15.13
DreEX0013095	90	LONG	AS	-0.71
DreEX0013100	1788	LONG	AS	-14.14
DreEX0013101	84	LONG	AS	-13.98
DreEX0013114	12	MIC	MIC_Neural	-11.07
DreEX0013115	33	MINI	AS	-15.08
DreEX0013117	99	LONG	LONG_Neural	-12.22
DreEX0013121	66	LONG	AS	-5.06
DreEX0013122	84	LONG	AS	-11.1
DreEX0013123	132	LONG	AS	-10.53
DreEX0013126	27	MIC	AS	-2.97
DreEX0013128	5871	LONG	LONG_Neural	-9.1
DreEX0013139	87	LONG	AS	-14.17
DreEX0013142	60	LONG	AS	1.81
DreEX0013144	27	MIC	AS	-16.78
DreEX0013146	5793	LONG	LONG_Neural	-8.49
DreEX0013149	24	MIC	AS	-5.92
DreEX0013202	75	LONG	AS	-18.87
DreEX0013213	75	LONG	AS	-11.11
DreEX0013232	113	LONG	AS	-6.97
DreEX0013237	251	LONG	AS	-2.99
DreEX0013238	90	LONG	AS	-7.82
DreEX0013248	72	LONG	AS	1.79
DreEX0013330	168	LONG	AS	9.65
DreEX0013368	99	LONG	AS	-2.28
DreEX0013414	12	MIC	AS	-7.52
DreEX0013449	87	LONG	AS	-16.38
DreEX0013460	27	MIC	AS	-7.22
DreEX0013477	45	MINI	MINI_Neural	-5.69
DreEX0013548	521	LONG	AS	-7.02
DreEX0013550	79	LONG	AS	0
DreEX0013640	91	LONG	AS	-6.35
DreEX0013641	80	LONG	AS	-10.22
DreEX0013644	123	LONG	AS	-9.07
DreEX0013645	59	LONG	AS	-11.26
DreEX0013646	79	LONG	AS	-6.86
DreEX0013647	82	LONG	AS	-12.31
DreEX0013648	95	LONG	AS	-12.07
DreEX0013649	114	LONG	AS	-6.38
DreEX0013657	189	LONG	AS	0
DreEX0013666	99	LONG	AS	5
DreEX0013673	21	MIC	MIC_Neural	-62.58
DreEX0013674	66	LONG	AS	-30.61
DreEX0013683	9	MIC	MIC_Neural	-14.98
DreEX0013684	102	LONG	AS	-5.84
DreEX0013723	12	MIC	MIC_Neural	-43.46
DreEX0013724	63	LONG	LONG_Neural	-23.3
DreEX0013725	72	LONG	AS	-15.12
DreEX0013733	42	MINI	AS	-0.06
DreEX0013740	15	MIC	MIC_Neural	-54.87
DreEX0013748	15	MIC	AS	-17.06
DreEX0013759	21	MIC	AS	-4.84
DreEX0013760	54	LONG	AS	1.9
DreEX0013761	24	MIC	AS	-34.95
DreEX0013819	33	MINI	AS	-21.37
DreEX0013826	33	MINI	AS	-43.63
DreEX0013839	36	MINI	AS	-11
DreEX0013846	6	MIC	MIC_Neural	-51.53
DreEX0013847	57	LONG	AS	-14.51
DreEX0013859	6	MIC	MIC_Neural	-34.42
DreEX0013860	54	LONG	AS	2.48
DreEX0013923	36	MINI	MINI_Neural	-24.76
DreEX0013924	168	LONG	AS	-2.82
DreEX0013925	57	LONG	AS	-4.44
DreEX0013983	96	LONG	AS	-6.76
DreEX0013999	168	LONG	AS	-0.46
DreEX0014006	171	LONG	AS	0.85
DreEX0014121	45	MINI	AS	-2.07
DreEX0014132	63	LONG	AS	0
DreEX0014146	9	MIC	AS	-26.32
DreEX0014167	9	MIC	AS	-36.55
DreEX0014169	317	LONG	AS	-6.35
DreEX0014172	102	LONG	AS	-5.06
DreEX0014180	57	LONG	AS	-16.38
DreEX0014183	81	LONG	AS	-6.24
DreEX0014185	33	MINI	AS	-5.62
DreEX0014187	96	LONG	AS	-4.85
DreEX0014216	75	LONG	AS	10.56
DreEX0014221	132	LONG	AS	-15.9
DreEX0014222	99	LONG	AS	-6.57
DreEX0014224	66	LONG	AS	12.08
DreEX0014237	72	LONG	AS	2.01
DreEX0014246	264	LONG	AS	-6.06
DreEX0014265	392	LONG	LONG_Neural	-32.4
DreEX0014276	361	LONG	LONG_Neural	-19.3
DreEX0014280	159	LONG	LONG_Neural	0.08
DreEX0014281	25	MIC	MIC_Neural	-26.53
DreEX0014293	87	LONG	AS	-11.13
DreEX0014296	51	MINI	MINI_Neural	-6.63
DreEX0014297	72	LONG	AS	-14.29
DreEX0014309	63	LONG	AS	-46.56
DreEX0014327	145	LONG	AS	-4.27
DreEX0014328	83	LONG	AS	0
DreEX0014347	51	MINI	AS	5.2
DreEX0014348	75	LONG	AS	1.34
DreEX0014349	186	LONG	AS	-0.18
DreEX0014371	60	LONG	LONG_Neural	-17.95
DreEX0014380	18	MIC	MIC_Neural	-44.15
DreEX0014381	399	LONG	LONG_Neural	-31.01
DreEX0014421	117	LONG	AS	-4.42
DreEX0014437	84	LONG	AS	1.2
DreEX0014439	150	LONG	AS	0.89
DreEX0014451	63	LONG	AS	-3.35
DreEX0014462	15	MIC	MIC_Neural	-54.8
DreEX0014464	33	MINI	AS	-20.95
DreEX0014480	21	MIC	AS	-14.27
DreEX0014499	37	MINI	AS	-17.79
DreEX0014500	27	MIC	AS	-19.2
DreEX0014525	156	LONG	AS	4.53
DreEX0014526	33	MINI	AS	-6.65
DreEX0014527	19	MIC	MIC_Neural	-17.63
DreEX0014551	87	LONG	AS	-3.18
DreEX0014585	239	LONG	AS	-4.71
DreEX0014587	54	LONG	AS	-0.05
DreEX0014588	300	LONG	AS	-3.63
DreEX0014601	21	MIC	AS	-16.16
DreEX0014608	171	LONG	LONG_Neural	-1.13
DreEX0014628	171	LONG	LONG_Neural	-11.62
DreEX0014633	84	LONG	AS	0.72
DreEX0014640	90	LONG	AS	9.11
DreEX0014663	141	LONG	AS	9.56
DreEX0014664	144	LONG	AS	-3.57
DreEX0014688	87	LONG	AS	-0.2
DreEX0014704	183	LONG	AS	-5.73
DreEX0014745	69	LONG	AS	4.81
DreEX0014751	60	LONG	AS	-9.41
DreEX0014753	60	LONG	AS	-18.23
DreEX0014775	13	MIC	AS	-37.99
DreEX0014818	163	LONG	AS	7.09
DreEX0014833	144	LONG	AS	-10.55
DreEX0014856	36	MINI	AS	-10.16
DreEX0014879	45	MINI	AS	1.24
DreEX0014897	62	LONG	AS	-3.89
DreEX0014901	69	LONG	AS	10.33
DreEX0014911	95	LONG	AS	6.62
DreEX0014961	4	MIC	AS	-2.66
DreEX0014972	24	MIC	AS	-5.25
DreEX0014975	73	LONG	AS	-8.43
DreEX0014995	197	LONG	AS	0
DreEX0014996	81	LONG	AS	-18.11
DreEX0014998	122	LONG	AS	0
DreEX0015020	118	LONG	LONG_Neural	2.79
DreEX0015024	234	LONG	LONG_Neural	6.18
DreEX0015025	54	LONG	AS	-5.12
DreEX0015027	113	LONG	AS	-9
DreEX0015028	21	MIC	AS	-7.6
DreEX0015055	9	MIC	MIC_Neural	-49.41
DreEX0015073	9	MIC	MIC_Neural	-61.37
DreEX0015075	69	LONG	LONG_Neural	-59.29
DreEX0015076	153	LONG	AS	-0.55
DreEX0015082	9	MIC	MIC_Neural	-55.77
DreEX0015119	135	LONG	AS	4.02
DreEX0015174	55	LONG	AS	-32.54
DreEX0015179	58	LONG	AS	4.37
DreEX0015221	78	LONG	AS	-2.19
DreEX0015234	18	MIC	AS	-10.11
DreEX0015303	36	MINI	AS	-0.48
DreEX0015304	24	MIC	MIC_Neural	-22.08
DreEX0015305	27	MIC	MIC_Neural	-23.77
DreEX0015309	45	MINI	MINI_Neural	-28.22
DreEX0015311	36	MINI	AS	0.61
DreEX0015340	150	LONG	AS	-4.17
DreEX0015351	24	MIC	AS	-30.13
DreEX0015355	120	LONG	AS	-20.59
DreEX0015360	3	MIC	AS	-35.12
DreEX0015418	46	MINI	AS	-23.41
DreEX0015426	44	MINI	AS	0
DreEX0015458	96	LONG	AS	-3.16
DreEX0015471	133	LONG	AS	-17.99
DreEX0015483	99	LONG	AS	-6.58
DreEX0015497	45	MINI	AS	2.76
DreEX0015515	72	LONG	AS	1.79
DreEX0015613	144	LONG	AS	-14.65
DreEX0015646	24	MIC	MIC_Neural	-8.28
DreEX0015647	90	LONG	LONG_Neural	0
DreEX0015658	91	LONG	LONG_Neural	-11.66
DreEX0015659	109	LONG	AS	9.53
DreEX0015660	32	MINI	AS	-2.67
DreEX0015732	24	MIC	AS	-4.41
DreEX0015736	27	MIC	AS	-80.09
DreEX0015759	40	MINI	AS	-6.75
DreEX0015765	44	MINI	AS	-8.97
DreEX0015799	29	MINI	AS	-19.03
DreEX0015807	166	LONG	AS	-5.39
DreEX0015813	33	MINI	MINI_Neural	-17.89
DreEX0015815	33	MINI	AS	-19.47
DreEX0015816	93	LONG	AS	-20.37
DreEX0015817	42	MINI	AS	-22.74
DreEX0015825	87	LONG	AS	-2.41
DreEX0015826	66	LONG	AS	-9.31
DreEX0015831	54	LONG	AS	-10.41
DreEX0015832	42	MINI	AS	-4.75
DreEX0015852	202	LONG	LONG_Neural	-7.42
DreEX0015853	36	MINI	AS	7.33
DreEX0015888	19	MIC	AS	-16.05
DreEX0015912	47	MINI	AS	-1.11
DreEX0015924	36	MINI	AS	-6.22
DreEX0015938	18	MIC	AS	-47.38
DreEX0015960	211	LONG	AS	0
DreEX0016048	54	LONG	AS	3.01
DreEX0016054	77	LONG	AS	-1.11
DreEX0016056	103	LONG	AS	-4.9
DreEX0016059	74	LONG	AS	4.37
DreEX0016060	74	LONG	AS	-6.28
DreEX0016073	14	MIC	AS	-20.99
DreEX0016117	58	LONG	AS	0
DreEX0016118	33	MINI	MINI_Neural	-24.46
DreEX0016213	48	MINI	AS	-13.54
DreEX0016214	72	LONG	AS	-4.89
DreEX0016215	215	LONG	LONG_Neural	5.03
DreEX0016216	116	LONG	AS	-11.08
DreEX0016233	18	MIC	MIC_Neural	-23.34
DreEX0016244	49	MINI	AS	-1.76
DreEX0016265	71	LONG	AS	-5.14
DreEX0016266	72	LONG	AS	3.99
DreEX0016319	86	LONG	AS	-9.57
DreEX0016320	72	LONG	AS	-11.06
DreEX0016321	90	LONG	AS	-13.26
DreEX0016322	67	LONG	AS	-15.77
DreEX0016323	41	MINI	AS	-20.24
DreEX0016324	39	MINI	AS	-20.94
DreEX0016325	70	LONG	AS	-13.13
DreEX0016336	108	LONG	LONG_Neural	-15.46
DreEX0016376	118	LONG	AS	1.88
DreEX0016377	72	LONG	AS	-12.28
DreEX0016387	116	LONG	AS	16.14
DreEX0016469	15	MIC	AS	-14.89
DreEX0016486	59	LONG	AS	-4.93
DreEX0016500	277	LONG	AS	-3.52
DreEX0016551	38	MINI	MINI_Neural	-31.37
DreEX0016553	12	MIC	MIC_Neural	-25.17
DreEX0016554	87	LONG	AS	-23.38
DreEX0016555	153	LONG	AS	-9.72
DreEX0016642	66	LONG	AS	-10.87
DreEX0016647	27	MIC	AS	-9.85
DreEX0016655	102	LONG	AS	0.92
DreEX0016703	15	MIC	MIC_Neural	-84.34
DreEX0016704	90	LONG	AS	1.37
DreEX0016708	78	LONG	AS	14.99
DreEX0016717	21	MIC	MIC_Neural	-14.33
DreEX0016740	60	LONG	AS	-10.15
DreEX0016741	129	LONG	AS	-6.85
DreEX0016760	36	MINI	AS	1.58
DreEX0016778	147	LONG	AS	3.56
DreEX0016842	57	LONG	AS	6.83
DreEX0016859	370	LONG	AS	6.04
DreEX0016861	72	LONG	AS	0.65
DreEX0016874	25	MIC	AS	-17.41
DreEX0016914	76	LONG	AS	9.81
DreEX0016927	18	MIC	AS	-18.97
DreEX0016928	255	LONG	AS	-13.84
DreEX0016930	93	LONG	AS	-24.07
DreEX0016936	33	MINI	AS	11.51
DreEX0016938	132	LONG	AS	-18.58
DreEX0016939	24	MIC	MIC_Neural	-56.46
DreEX0016940	351	LONG	LONG_Neural	-21.95
DreEX0016944	36	MINI	MINI_Neural	-25.38
DreEX0016958	42	MINI	AS	-1.39
DreEX0016997	216	LONG	AS	-2.37
DreEX0016998	69	LONG	AS	-4.43
DreEX0017012	149	LONG	AS	4.81
DreEX0017131	181	LONG	AS	-6.26
DreEX0017153	255	LONG	AS	-7.43
DreEX0017158	74	LONG	AS	14.91
DreEX0017159	340	LONG	AS	2.98
DreEX0017165	36	MINI	AS	-3.86
DreEX0017207	129	LONG	AS	0
DreEX0017208	33	MINI	AS	-2.14
DreEX0017222	107	LONG	AS	-12.24
DreEX0017223	46	MINI	AS	-13.46
DreEX0017224	82	LONG	AS	-11.64
DreEX0017243	248	LONG	AS	-2.26
DreEX0017245	171	LONG	LONG_Neural	-4.74
DreEX0017248	120	LONG	AS	-14.46
DreEX0017279	131	LONG	AS	-0.94
DreEX0017281	295	LONG	AS	0
DreEX0017295	69	LONG	AS	-2.56
DreEX0017304	126	LONG	AS	-4.92
DreEX0017305	69	LONG	AS	-2.24
DreEX0017328	126	LONG	AS	-9.36
DreEX0017330	93	LONG	AS	-2.01
DreEX0017331	45	MINI	MINI_Neural	-3.39
DreEX0017342	51	MINI	AS	-4.41
DreEX0017364	82	LONG	AS	-0.07
DreEX0017365	56	LONG	AS	-0.35
DreEX0017405	14	MIC	AS	-1.68
DreEX0017408	127	LONG	AS	-23.55
DreEX0017472	351	LONG	AS	-14.98
DreEX0017513	102	LONG	AS	-12.56
DreEX0017517	102	LONG	AS	-6.57
DreEX0017534	120	LONG	AS	-11.98
DreEX0017636	27	MIC	AS	4.75
DreEX0017717	174	LONG	LONG_Neural	-21.24
DreEX0017718	155	LONG	AS	10.91
DreEX0017806	195	LONG	AS	-17.98
DreEX0017854	127	LONG	AS	-6.68
DreEX0017858	73	LONG	AS	-16.68
DreEX0017859	54	LONG	AS	-14.77
DreEX0017860	73	LONG	AS	-2.15
DreEX0017861	27	MIC	AS	0.28
DreEX0017891	24	MIC	AS	-14.54
DreEX0017914	85	LONG	AS	-8.05
DreEX0017919	78	LONG	AS	12.59
DreEX0017925	78	LONG	AS	-12.94
DreEX0017934	195	LONG	AS	-6.86
DreEX0017965	12	MIC	AS	-32.08
DreEX0017966	3	MIC	AS	-13.92
DreEX0017967	51	MINI	AS	-14.02
DreEX0017974	97	LONG	LONG_Neural	-17.05
DreEX0017975	97	LONG	AS	16.73
DreEX0017986	12	MIC	AS	-26.36
DreEX0017987	6	MIC	AS	-17.97
DreEX0017989	97	LONG	AS	-31.8
DreEX0017990	97	LONG	AS	11.55
DreEX0017991	120	LONG	AS	-12.7
DreEX0017992	36	MINI	AS	-11.2
DreEX0018007	42	MINI	AS	1.61
DreEX0018011	36	MINI	AS	-19.55
DreEX0018016	97	LONG	AS	9.25
DreEX0018018	3	MIC	AS	-43.62
DreEX0018020	39	MINI	AS	5.33
DreEX0018021	63	LONG	AS	-33.33
DreEX0018033	48	MINI	AS	32.65
DreEX0018040	27	MIC	AS	-48.5
DreEX0018043	75	LONG	AS	-4.13
DreEX0018047	33	MINI	AS	-5.86
DreEX0018048	60	LONG	AS	1.14
DreEX0018049	60	LONG	AS	-13.1
DreEX0018051	78	LONG	AS	-16.63
DreEX0018052	27	MIC	AS	-5.1
DreEX0018085	12	MIC	AS	2.87
DreEX0018086	129	LONG	AS	-11.54
DreEX0018087	97	LONG	AS	3.92
DreEX0018116	233	LONG	AS	-11.49
DreEX0018120	48	MINI	AS	-13.46
DreEX0018121	66	LONG	AS	-24.8
DreEX0018135	169	LONG	AS	4.87
DreEX0018136	155	LONG	AS	11.24
DreEX0018158	57	LONG	AS	-1.32
DreEX0018167	117	LONG	AS	-6.67
DreEX0018170	89	LONG	LONG_Neural	-24.61
DreEX0018173	21	MIC	AS	-13.45
DreEX0018183	45	MINI	AS	-7.46
DreEX0018186	18	MIC	AS	-35.41
DreEX0018197	21	MIC	AS	14.99
DreEX0018202	21	MIC	MIC_Neural	-8.32
DreEX0018203	18	MIC	AS	-13.38
DreEX0018212	146	LONG	AS	-4.05
DreEX0018213	29	MINI	AS	1.54
DreEX0018221	20	MIC	AS	-14.87
DreEX0018223	134	LONG	AS	4.19
DreEX0018224	81	LONG	AS	-3.24
DreEX0018228	9	MIC	AS	-60.98
DreEX0018229	25	MIC	AS	-20.19
DreEX0018259	81	LONG	AS	5.67
DreEX0018309	39	MINI	AS	0.34
DreEX0018325	18	MIC	AS	-3.58
DreEX0018333	84	LONG	AS	2.14
DreEX0018334	33	MINI	AS	-28.14
DreEX0018338	21	MIC	AS	-8.91
DreEX0018353	348	LONG	AS	-10.53
DreEX0018354	21	MIC	AS	-3.04
DreEX0018361	66	LONG	AS	2.42
DreEX0018370	9	MIC	MIC_Neural	-41.95
DreEX0018371	15	MIC	AS	-7.36
DreEX0018373	120	LONG	LONG_Neural	-32.16
DreEX0018374	30	MINI	MINI_Neural	-31.5
DreEX0018377	33	MINI	MINI_Neural	-9.6
DreEX0018389	12	MIC	AS	-59.55
DreEX0018390	9	MIC	AS	-30.08
DreEX0018391	15	MIC	AS	-18.87
DreEX0018392	159	LONG	AS	-23.33
DreEX0018393	30	MINI	AS	-5.14
DreEX0018394	153	LONG	AS	-32.08
DreEX0018395	69	LONG	AS	-5.61
DreEX0018396	33	MINI	AS	-16.61
DreEX0018399	69	LONG	AS	-1.37
DreEX0018405	12	MIC	AS	-28.45
DreEX0018406	9	MIC	AS	-32.47
DreEX0018408	162	LONG	AS	-16.9
DreEX0018411	102	LONG	AS	0.21
DreEX0018412	64	LONG	AS	-0.32
DreEX0018416	30	MINI	AS	-12.8
DreEX0018450	80	LONG	AS	1.74
DreEX0018478	44	MINI	AS	-3.59
DreEX0018506	141	LONG	AS	1.14
DreEX0018509	188	LONG	AS	1.67
DreEX0018540	13	MIC	AS	-25.85
DreEX0018561	33	MINI	AS	-8.4
DreEX0018570	73	LONG	AS	-1.45
DreEX0018571	69	LONG	AS	11.75
DreEX0018577	73	LONG	LONG_Neural	-6.23
DreEX0018584	96	LONG	LONG_Neural	-17.22
DreEX0018590	45	MINI	AS	7.46
DreEX0018603	45	MINI	MINI_Neural	-15.7
DreEX0018605	73	LONG	LONG_Neural	-12.38
DreEX0018606	73	LONG	AS	-20.58
DreEX0018616	102	LONG	AS	-11.4
DreEX0018617	21	MIC	MIC_Neural	-46.03
DreEX0018628	87	LONG	LONG_Neural	-10
DreEX0018629	63	LONG	LONG_Neural	-6.99
DreEX0018630	105	LONG	LONG_Neural	-12.12
DreEX0018631	138	LONG	AS	-17.37
DreEX0018641	33	MINI	MINI_Neural	-14.6
DreEX0018642	78	LONG	AS	3.39
DreEX0018650	63	LONG	AS	-45.1
DreEX0018653	132	LONG	AS	-9.57
DreEX0018664	48	MINI	MINI_Neural	-21.25
DreEX0018687	9	MIC	AS	-39.13
DreEX0018688	25	MIC	AS	-22.47
DreEX0018704	33	MINI	MINI_Neural	3.03
DreEX0018705	60	LONG	AS	-25.62
DreEX0018711	33	MINI	MINI_Neural	-7.71
DreEX0018716	66	LONG	AS	-6.91
DreEX0018732	141	LONG	AS	-2.54
DreEX0018735	31	MINI	AS	-44.88
DreEX0018740	31	MINI	MINI_Neural	-21.58
DreEX0018822	3	MIC	AS	-14.42
DreEX0018878	123	LONG	AS	0.84
DreEX0018902	121	LONG	AS	-6.27
DreEX0018920	95	LONG	AS	-0.07
DreEX0018974	237	LONG	AS	4.04
DreEX0018975	92	LONG	AS	-1.24
DreEX0018978	68	LONG	AS	-8.16
DreEX0018992	168	LONG	LONG_Neural	-41.57
DreEX0019017	18	MIC	MIC_Neural	-59.53
DreEX0019019	48	MINI	AS	-3.71
DreEX0019022	27	MIC	AS	-23.69
DreEX0019023	69	LONG	AS	-8.96
DreEX0019025	39	MINI	AS	-12.52
DreEX0019037	39	MINI	AS	-12.64
DreEX0019051	77	LONG	AS	-1.39
DreEX0019063	56	LONG	AS	0
DreEX0019064	118	LONG	AS	-2.49
DreEX0019085	33	MINI	AS	-3.13
DreEX0019103	81	LONG	AS	-14.92
DreEX0019104	99	LONG	AS	-14.4
DreEX0019105	129	LONG	AS	-6.17
DreEX0019106	105	LONG	AS	-15.26
DreEX0019120	336	LONG	AS	-13.82
DreEX0019123	66	LONG	AS	-2.7
DreEX0019126	58	LONG	AS	-8.67
DreEX0019169	56	LONG	AS	4.12
DreEX0019177	111	LONG	AS	31.56
DreEX0019228	95	LONG	AS	-1.22
DreEX0019229	67	LONG	AS	-7.2
DreEX0019276	15	MIC	AS	7.06
DreEX0019277	15	MIC	MIC_Neural	-55.09
DreEX0019278	57	LONG	AS	-8.61
DreEX0019292	114	LONG	AS	-0.34
DreEX0019293	211	LONG	AS	-3.22
DreEX0019295	63	LONG	AS	-24.7
DreEX0019374	75	LONG	AS	-10.83
DreEX0019391	75	LONG	AS	-4.3
DreEX0019436	33	MINI	MINI_Neural	-28.71
DreEX0019494	1119	LONG	AS	-9.56
DreEX0019518	75	LONG	AS	-2.22
DreEX0019560	42	MINI	AS	-18.16
DreEX0019564	12	MIC	AS	-23.1
DreEX0019566	113	LONG	AS	-8.81
DreEX0019617	34	MINI	AS	-14.33
DreEX0019621	58	LONG	AS	-9.59
DreEX0019627	39	MINI	AS	-9.11
DreEX0019636	84	LONG	AS	1.02
DreEX0019637	162	LONG	AS	-7.01
DreEX0019660	9	MIC	AS	-10.81
DreEX0019662	500	LONG	AS	-6.32
DreEX0019669	48	MINI	AS	-14.81
DreEX0019703	9	MIC	AS	13.75
DreEX0019753	121	LONG	AS	-3.24
DreEX0019754	216	LONG	AS	-6.34
DreEX0019813	14	MIC	AS	-5.57
DreEX0019816	155	LONG	AS	-33.37
DreEX0019822	14	MIC	AS	-6.47
DreEX0019825	61	LONG	AS	-22.05
DreEX0019826	63	LONG	AS	-17.47
DreEX0019827	88	LONG	AS	0.95
DreEX0019840	21	MIC	AS	-7.1
DreEX0019841	24	MIC	MIC_Neural	-44.59
DreEX0019866	82	LONG	AS	3.09
DreEX0019867	40	MINI	MINI_Neural	-6.41
DreEX0019910	133	LONG	AS	-1.45
DreEX0019930	21	MIC	AS	-24.05
DreEX0019932	71	LONG	AS	-3.57
DreEX0020029	42	MINI	AS	-12.09
DreEX0020042	108	LONG	LONG_Neural	-12.6
DreEX0020052	68	LONG	AS	-5.17
DreEX0020068	79	LONG	AS	-5
DreEX0020083	110	LONG	LONG_Neural	-16.23
DreEX0020084	322	LONG	AS	-10.83
DreEX0020100	183	LONG	AS	0.36
DreEX0020101	66	LONG	LONG_Neural	-32.44
DreEX0020155	97	LONG	AS	-2.62
DreEX0020176	39	MINI	AS	-14.47
DreEX0020205	79	LONG	AS	1.32
DreEX0020206	85	LONG	AS	-21.43
DreEX0020255	25	MIC	AS	-8.56
DreEX0020256	87	LONG	AS	-13.79
DreEX0020311	6	MIC	AS	-1.46
DreEX0020376	6	MIC	AS	-58.82
DreEX0020422	914	LONG	AS	4.64
DreEX0020432	165	LONG	AS	-4.16
DreEX0020470	121	LONG	AS	-3.85
DreEX0020473	56	LONG	AS	-9.55
DreEX0020509	123	LONG	LONG_Neural	5.71
DreEX0020538	10	MIC	AS	-11.07
DreEX0020560	150	LONG	AS	-0.41
DreEX0020576	276	LONG	AS	-26.4
DreEX0020577	255	LONG	AS	-21.63
DreEX0020589	211	LONG	AS	-6.89
DreEX0020602	148	LONG	AS	10.59
DreEX0020603	120	LONG	AS	7.52
DreEX0020604	198	LONG	AS	8.26
DreEX0020605	108	LONG	AS	5.54
DreEX0020606	115	LONG	AS	6.15
DreEX0020607	187	LONG	AS	5.08
DreEX0020617	21	MIC	MIC_Neural	-28.09
DreEX0020619	123	LONG	AS	-31.13
DreEX0020629	135	LONG	LONG_Neural	4.35
DreEX0020639	114	LONG	AS	-10.3
DreEX0020757	113	LONG	AS	-9.56
DreEX0020837	30	MINI	MINI_Neural	-15.9
DreEX0020866	282	LONG	LONG_Neural	16.43
DreEX0020867	93	LONG	AS	1.64
DreEX0020888	171	LONG	AS	33.49
DreEX0020906	885	LONG	AS	-22.46
DreEX0020909	21	MIC	AS	-68.36
DreEX0020911	21	MIC	AS	-53.94
DreEX0020926	123	LONG	AS	-2.73
DreEX0020935	147	LONG	AS	-11.43
DreEX0020953	97	LONG	AS	-6.58
DreEX0020954	96	LONG	AS	-19.94
DreEX0021008	107	LONG	AS	6.84
DreEX0021014	189	LONG	AS	-6.7
DreEX0021053	58	LONG	AS	-9.23
DreEX0021077	130	LONG	LONG_Neural	-5.16
DreEX0021087	106	LONG	AS	0
DreEX0021220	168	LONG	AS	22.27
DreEX0021257	74	LONG	AS	-3.21
DreEX0021269	27	MIC	AS	-24.56
DreEX0021275	27	MIC	AS	-5.16
DreEX0021302	63	LONG	AS	-7.5
DreEX0021303	75	LONG	AS	-24.05
DreEX0021304	66	LONG	AS	-23.85
DreEX0021305	63	LONG	AS	-9.53
DreEX0021306	33	MINI	AS	-16.44
DreEX0021307	39	MINI	AS	-14.6
DreEX0021308	54	LONG	AS	-9.51
DreEX0021338	15	MIC	AS	-39.64
DreEX0021341	58	LONG	LONG_Neural	-19.26
DreEX0021343	15	MIC	AS	-11.91
DreEX0021351	24	MIC	MIC_Neural	-30.33
DreEX0021359	21	MIC	MIC_Neural	-19.37
DreEX0021408	117	LONG	AS	4.27
DreEX0021454	76	LONG	AS	-4.19
DreEX0021511	36	MINI	AS	-31.27
DreEX0021565	54	LONG	AS	2.17
DreEX0021585	36	MINI	AS	-22.19
DreEX0021587	60	LONG	AS	-10.35
DreEX0021588	39	MINI	AS	-8.35
DreEX0021589	69	LONG	AS	-19.66
DreEX0021590	108	LONG	AS	-13.64
DreEX0021591	159	LONG	AS	-11.17
DreEX0021596	18	MIC	MIC_Neural	-31.48
DreEX0021597	45	MINI	AS	15.13
DreEX0021600	57	LONG	AS	1.24
DreEX0021601	30	MINI	AS	-11.26
DreEX0021602	75	LONG	AS	-18.39
DreEX0021603	108	LONG	AS	-11.55
DreEX0021604	162	LONG	AS	-12.71
DreEX0021682	122	LONG	AS	5.58
DreEX0021752	823	LONG	AS	0
DreEX0021802	139	LONG	AS	4.19
DreEX0021838	73	LONG	AS	-5.19
DreEX0021841	122	LONG	AS	0
DreEX0021859	24	MIC	MIC_Neural	-38.36
DreEX0021892	86	LONG	LONG_Neural	-69.34
DreEX0021893	86	LONG	AS	16.37
DreEX0021913	24	MIC	MIC_Neural	-26.24
DreEX0021914	27	MIC	MIC_Neural	-32.41
DreEX0021915	24	MIC	AS	-18.07
DreEX0021917	141	LONG	LONG_Neural	-4.75
DreEX0021918	57	LONG	AS	4.12
DreEX0021926	162	LONG	AS	-14.19
DreEX0021927	63	LONG	AS	-27.04
DreEX0021944	3	MIC	AS	-43.59
DreEX0021946	21	MIC	MIC_Neural	-48.03
DreEX0021947	24	MIC	MIC_Neural	-53.47
DreEX0021949	27	MIC	AS	0.29
DreEX0021950	27	MIC	AS	-29.71
DreEX0021952	42	MINI	AS	5.92
DreEX0021953	108	LONG	AS	-5.96
DreEX0021954	63	LONG	LONG_Neural	5.72
DreEX0021994	76	LONG	AS	-10.41
DreEX0021995	47	MINI	AS	-17.74
DreEX0022027	75	LONG	AS	-10.95
DreEX0022054	53	LONG	AS	-7.08
DreEX0022072	6	MIC	AS	-5.74
DreEX0022122	105	LONG	AS	-21.81
DreEX0022124	96	LONG	AS	4.12
DreEX0022127	9	MIC	AS	-27.08
DreEX0022132	105	LONG	LONG_Neural	-4.41
DreEX0022145	91	LONG	AS	-4.15
DreEX0022158	91	LONG	AS	-3.09
DreEX0022164	91	LONG	AS	-5.07
DreEX0022230	51	MINI	AS	-6.33
DreEX0022231	30	MINI	AS	-3.56
DreEX0022246	54	LONG	LONG_Neural	-31.98
DreEX0022247	36	MINI	MINI_Neural	-25.15
DreEX0022256	3	MIC	AS	-37.81
DreEX0022257	12	MIC	AS	-21.92
DreEX0022266	3	MIC	MIC_Neural	-38.42
DreEX0022267	21	MIC	AS	-3.7
DreEX0022278	60	LONG	AS	-16.2
DreEX0022292	126	LONG	AS	-5.88
DreEX0022295	123	LONG	AS	-9.14
DreEX0022315	91	LONG	AS	1.25
DreEX0022319	72	LONG	AS	-2.1
DreEX0022435	60	LONG	AS	-8.32
DreEX0022437	30	MINI	MINI_Neural	-31.64
DreEX0022442	42	MINI	AS	0
DreEX0022444	24	MIC	AS	-26.5
DreEX0022445	147	LONG	AS	2.77
DreEX0022484	69	LONG	LONG_Neural	-0.45
DreEX0022683	204	LONG	LONG_Neural	1.14
DreEX0022709	78	LONG	AS	-5.53
DreEX0022710	45	MINI	AS	-13.83
DreEX0022713	22	MIC	AS	-18.66
DreEX0022785	54	LONG	AS	-7.62
DreEX0022786	45	MINI	AS	-8.86
DreEX0022788	54	LONG	AS	-8.72
DreEX0022789	54	LONG	AS	-6.94
DreEX0022790	54	LONG	AS	-4.5
DreEX0022791	108	LONG	AS	-4.55
DreEX0022793	54	LONG	AS	-4.85
DreEX0022794	108	LONG	AS	-4.79
DreEX0022800	54	LONG	AS	-4.76
DreEX0022801	54	LONG	AS	-6.78
DreEX0022802	54	LONG	AS	-6.6
DreEX0022803	54	LONG	AS	-5.89
DreEX0022805	54	LONG	AS	-5.75
DreEX0022806	54	LONG	AS	-3.21
DreEX0022809	54	LONG	AS	-4.05
DreEX0022815	87	LONG	AS	-7.26
DreEX0022816	165	LONG	AS	-17.57
DreEX0022817	99	LONG	AS	-3.68
DreEX0022818	297	LONG	AS	-7.38
DreEX0022847	117	LONG	AS	-2.85
DreEX0022848	129	LONG	AS	-12.02
DreEX0022849	222	LONG	AS	-5.06
DreEX0022877	117	LONG	AS	-0.29
DreEX0022889	273	LONG	AS	-1.81
DreEX0022890	270	LONG	AS	-5.63
DreEX0022891	270	LONG	AS	-5.29
DreEX0022892	267	LONG	AS	-6.38
DreEX0022893	193	LONG	AS	-4.35
DreEX0022894	128	LONG	AS	-2.4
DreEX0022895	141	LONG	AS	-1.7
DreEX0022896	51	MINI	AS	0.23
DreEX0022897	264	LONG	AS	-0.72
DreEX0022898	165	LONG	AS	-3.15
DreEX0022899	174	LONG	AS	-2.65
DreEX0022900	291	LONG	AS	2.23
DreEX0022901	603	LONG	AS	1.85
DreEX0022902	279	LONG	AS	0.09
DreEX0022912	21	MIC	AS	-15.84
DreEX0022917	117	LONG	AS	1.82
DreEX0022918	276	LONG	AS	-2.52
DreEX0022919	273	LONG	AS	0.64
DreEX0022920	270	LONG	AS	4.03
DreEX0022921	267	LONG	AS	-1.65
DreEX0022922	193	LONG	AS	-7.33
DreEX0022923	125	LONG	AS	-15.33
DreEX0022924	144	LONG	AS	-7.76
DreEX0022925	57	LONG	AS	-2.39
DreEX0022926	264	LONG	AS	-1.9
DreEX0022927	165	LONG	AS	-6.97
DreEX0022928	174	LONG	AS	-4.01
DreEX0022929	291	LONG	AS	-2.2
DreEX0022930	603	LONG	AS	-4.15
DreEX0022931	279	LONG	AS	-6.46
DreEX0022980	486	LONG	AS	-8.32
DreEX0022989	90	LONG	AS	0.36
DreEX0022999	36	MINI	AS	-6.75
DreEX0023010	51	MINI	AS	-12.47
DreEX0023059	99	LONG	AS	-0.03
DreEX0023060	45	MINI	AS	0.88
DreEX0023061	99	LONG	AS	0.85
DreEX0023062	54	LONG	AS	0.87
DreEX0023063	108	LONG	AS	-0.68
DreEX0023064	54	LONG	AS	-0.07
DreEX0023065	99	LONG	AS	0.15
DreEX0023066	54	LONG	AS	0.28
DreEX0023067	99	LONG	AS	0.5
DreEX0023068	54	LONG	AS	0.73
DreEX0023070	54	LONG	AS	0.77
DreEX0023071	54	LONG	AS	0.98
DreEX0023072	54	LONG	AS	0.95
DreEX0023073	45	MINI	AS	0.08
DreEX0023074	99	LONG	AS	-0.11
DreEX0023075	108	LONG	AS	-0.07
DreEX0023076	108	LONG	AS	-0.21
DreEX0023077	54	LONG	AS	-0.41
DreEX0023078	54	LONG	AS	-0.55
DreEX0023079	108	LONG	AS	0.3
DreEX0023080	54	LONG	AS	-0.16
DreEX0023081	54	LONG	AS	0.31
DreEX0023084	108	LONG	AS	0.21
DreEX0023085	54	LONG	AS	0.03
DreEX0023086	108	LONG	AS	-0.04
DreEX0023087	54	LONG	AS	-0.36
DreEX0023091	54	LONG	AS	-0.62
DreEX0023092	45	MINI	AS	-2.49
DreEX0023093	54	LONG	AS	-0.51
DreEX0023094	45	MINI	AS	0.24
DreEX0023095	54	LONG	AS	0
DreEX0023192	210	LONG	AS	-15.2
DreEX0023284	78	LONG	AS	-25.69
DreEX0023293	81	LONG	AS	-2.69
DreEX0023328	64	LONG	AS	-0.21
DreEX0023333	9	MIC	MIC_Neural	-20.16
DreEX0023335	51	MINI	AS	-8.52
DreEX0023348	69	LONG	AS	-6.52
DreEX0023465	81	LONG	AS	1.36
DreEX0023467	186	LONG	AS	-7.99
DreEX0023474	66	LONG	AS	0
DreEX0023480	594	LONG	AS	-2.13
DreEX0023629	36	MINI	AS	-1.3
DreEX0023742	33	MINI	AS	-12.98
DreEX0023753	130	LONG	AS	-20.68
DreEX0023786	123	LONG	AS	-0.62
DreEX0023804	113	LONG	AS	5.46
DreEX0023836	132	LONG	AS	0
DreEX0023879	97	LONG	AS	-7.41
DreEX0023915	24	MIC	AS	-5.55
DreEX0023919	24	MIC	MIC_Neural	-46.3
DreEX0023952	96	LONG	AS	-1.47
DreEX0023953	99	LONG	AS	-10.75
DreEX0023972	115	LONG	AS	-7.6
DreEX0024052	33	MINI	AS	-5.42
DreEX0024059	88	LONG	LONG_Neural	-21.12
DreEX0024060	85	LONG	AS	-0.95
DreEX0024068	85	LONG	AS	-11.07
DreEX0024181	151	LONG	LONG_Neural	-58.91
DreEX0024209	246	LONG	AS	0.6
DreEX0024220	330	LONG	AS	-3
DreEX0024233	70	LONG	AS	-5.01
DreEX0024234	117	LONG	AS	-19.47
DreEX0024249	73	LONG	AS	-11.11
DreEX0024254	149	LONG	AS	3.68
DreEX0024255	127	LONG	AS	-0.61
DreEX0024351	105	LONG	LONG_Neural	-27.27
DreEX0024358	63	LONG	AS	0.48
DreEX0024448	63	LONG	AS	-3.85
DreEX0024449	102	LONG	AS	-4.35
DreEX0024451	122	LONG	AS	-4.77
DreEX0024452	85	LONG	AS	-8.56
DreEX0024456	21	MIC	MIC_Neural	-4.92
DreEX0024476	12	MIC	AS	-1.17
DreEX0024477	15	MIC	AS	1.93
DreEX0024480	289	LONG	LONG_Neural	-8.48
DreEX0024481	174	LONG	AS	-1.33
DreEX0024494	176	LONG	AS	-11.01
DreEX0024498	114	LONG	AS	0
DreEX0024499	63	LONG	AS	0
DreEX0024558	69	LONG	AS	-5.69
DreEX0024573	111	LONG	AS	-2.75
DreEX0024575	24	MIC	MIC_Neural	-27.5
DreEX0024584	102	LONG	LONG_Neural	-9.03
DreEX0024593	102	LONG	AS	-17.32
DreEX0024628	57	LONG	AS	-3.38
DreEX0024634	57	LONG	AS	-2.38
DreEX0024645	73	LONG	AS	0
DreEX0024670	618	LONG	AS	-1.5
DreEX0024691	60	LONG	LONG_Neural	-32.7
DreEX0024708	126	LONG	AS	0.88
DreEX0024718	71	LONG	AS	-9.99
DreEX0024744	115	LONG	AS	-12.24
DreEX0024789	225	LONG	AS	0.57
DreEX0024794	33	MINI	AS	1.98
DreEX0024800	33	MINI	AS	1.51
DreEX0024849	27	MIC	MIC_Neural	-10.95
DreEX0024875	152	LONG	LONG_Neural	-8.26
DreEX0024876	18	MIC	AS	-10.07
DreEX0024910	57	LONG	AS	-1.4
DreEX0024941	104	LONG	AS	5.75
DreEX0024942	80	LONG	AS	4.73
DreEX0024943	79	LONG	AS	3.17
DreEX0024944	181	LONG	AS	11.32
DreEX0024945	104	LONG	AS	-15.52
DreEX0024946	80	LONG	AS	-14.65
DreEX0024947	79	LONG	AS	-14.95
DreEX0024948	181	LONG	AS	-12.86
DreEX0024952	79	LONG	AS	1.34
DreEX0025032	1272	LONG	AS	0
DreEX0025058	66	LONG	AS	2.5
DreEX0025134	124	LONG	AS	0
DreEX0025143	81	LONG	AS	-8.52
DreEX0025146	87	LONG	LONG_Neural	-17.63
DreEX0025147	45	MINI	AS	-0.36
DreEX0025213	66	LONG	AS	2.68
DreEX0025283	87	LONG	AS	1.33
DreEX0025322	3	MIC	MIC_Neural	-81.88
DreEX0025338	117	LONG	AS	-6.73
DreEX0025357	47	MINI	AS	-3.35
DreEX0025431	161	LONG	AS	-11.18
DreEX0025432	180	LONG	AS	-13.9
DreEX0025433	142	LONG	LONG_Neural	-15.33
DreEX0025434	185	LONG	AS	-15.15
DreEX0025435	142	LONG	AS	-13.18
DreEX0025450	166	LONG	AS	-8.7
DreEX0025451	161	LONG	AS	-10.22
DreEX0025484	142	LONG	AS	12.61
DreEX0025552	3	MIC	AS	-25.16
DreEX0025556	83	LONG	AS	-3.3
DreEX0025560	67	LONG	AS	-4.69
DreEX0025561	119	LONG	AS	-7.07
DreEX0025590	27	MIC	MIC_Neural	-48.86
DreEX0025603	30	MINI	AS	-15.9
DreEX0025606	95	LONG	AS	-5.49
DreEX0025614	106	LONG	LONG_Neural	-4.87
DreEX0025619	63	LONG	AS	-10.14
DreEX0025620	54	LONG	AS	-7.19
DreEX0025621	63	LONG	AS	-6.95
DreEX0025626	66	LONG	AS	-5.22
DreEX0025627	60	LONG	AS	-6.01
DreEX0025639	133	LONG	AS	-10.99
DreEX0025653	66	LONG	AS	-0.51
DreEX0025737	139	LONG	AS	-12.62
DreEX0025758	108	LONG	AS	-5.88
DreEX0025779	83	LONG	AS	-1.69
DreEX0025783	90	LONG	AS	-17.24
DreEX0025806	105	LONG	LONG_Neural	-18.89
DreEX0025820	75	LONG	AS	2.83
DreEX0025821	93	LONG	AS	-20.15
DreEX0025822	72	LONG	AS	-5.37
DreEX0025840	187	LONG	AS	-0.34
DreEX0025841	128	LONG	AS	-0.96
DreEX0025865	42	MINI	AS	-0.35
DreEX0025866	159	LONG	AS	-2.48
DreEX0025867	60	LONG	AS	-15.78
DreEX0025870	3	MIC	AS	1.19
DreEX0025926	74	LONG	AS	-20.31
DreEX0025933	13	MIC	AS	-28.59
DreEX0025935	57	LONG	LONG_Neural	-24.81
DreEX0025996	300	LONG	LONG_Neural	0
DreEX0026019	179	LONG	AS	3.57
DreEX0026022	6	MIC	MIC_Neural	-16.11
DreEX0026038	21	MIC	MIC_Neural	-11.67
DreEX0026076	146	LONG	AS	-2.47
DreEX0026077	167	LONG	AS	-20.41
DreEX0026091	96	LONG	AS	-3.51
DreEX0026121	114	LONG	AS	-14.29
DreEX0026122	48	MINI	AS	-9.53
DreEX0026164	101	LONG	AS	0
DreEX0026193	282	LONG	AS	0
DreEX0026220	48	MINI	AS	-3
DreEX0026389	43	MINI	AS	-4.67
DreEX0026399	80	LONG	AS	-3.29
DreEX0026450	27	MIC	MIC_Neural	-28.31
DreEX0026490	105	LONG	AS	-7.92
DreEX0026492	72	LONG	AS	6.81
DreEX0026501	42	MINI	AS	-9.19
DreEX0026502	108	LONG	AS	-17.86
DreEX0026503	60	LONG	AS	-4.87
DreEX0026515	37	MINI	AS	-47.45
DreEX0026541	63	LONG	AS	-30.56
DreEX0026686	69	LONG	AS	-11.43
DreEX0026687	131	LONG	LONG_Neural	-20.33
DreEX0026704	45	MINI	MINI_Neural	3.5
DreEX0026706	57	LONG	AS	-3.55
DreEX0026718	971	LONG	AS	-10.85
DreEX0026810	268	LONG	AS	-6.97
DreEX0026811	108	LONG	AS	-0.34
DreEX0026854	95	LONG	AS	-7.41
DreEX0026864	75	LONG	AS	0.31
DreEX0026865	167	LONG	AS	0.57
DreEX0026923	143	LONG	AS	-8.7
DreEX0026935	63	LONG	LONG_Neural	-12.07
DreEX0026971	114	LONG	AS	-0.96
DreEX0026994	30	MINI	AS	-10.45
DreEX0027003	132	LONG	AS	1.92
DreEX0027004	33	MINI	AS	-11.12
DreEX0027019	6	MIC	AS	-6.13
DreEX0027020	24	MIC	MIC_Neural	-6.99
DreEX0027024	18	MIC	AS	-46.97
DreEX0027028	18	MIC	AS	-20.53
DreEX0027037	126	LONG	LONG_Neural	-14.19
DreEX0027043	30	MINI	AS	-10
DreEX0027052	30	MINI	AS	-20.22
DreEX0027053	110	LONG	AS	0
DreEX0027090	124	LONG	AS	2.7
DreEX0027192	108	LONG	LONG_Neural	-1.33
DreEX0027193	105	LONG	AS	0.66
DreEX0027195	97	LONG	AS	-0.52
DreEX0027197	42	MINI	AS	-0.84
DreEX0027207	34	MINI	AS	-20.17
DreEX0027208	42	MINI	AS	2.49
DreEX0027209	117	LONG	AS	-2.11
DreEX0027210	99	LONG	AS	3.49
DreEX0027220	84	LONG	AS	2.03
DreEX0027221	45	MINI	AS	-7.86
DreEX0027222	24	MIC	AS	-48
DreEX0027223	60	LONG	LONG_Neural	-24.52
DreEX0027224	100	LONG	AS	4.15
DreEX0027225	46	MINI	AS	-7.81
DreEX0027226	60	LONG	AS	0.14
DreEX0027227	159	LONG	LONG_Neural	5.53
DreEX0027237	147	LONG	AS	-8.28
DreEX0027238	54	LONG	AS	5.29
DreEX0027239	30	MINI	MINI_Neural	-13.58
DreEX0027240	100	LONG	AS	8.3
DreEX0027241	46	MINI	MINI_Neural	-27.81
DreEX0027254	110	LONG	AS	-0.1
DreEX0027264	231	LONG	AS	1.33
DreEX0027266	78	LONG	LONG_Neural	-24.16
DreEX0027268	153	LONG	AS	-3.49
DreEX0027271	84	LONG	AS	2.35
DreEX0027347	62	LONG	AS	-0.76
DreEX0027352	26	MIC	AS	-7.26
DreEX0027360	66	LONG	AS	-4.04
DreEX0027375	66	LONG	LONG_Neural	0
DreEX0027383	45	MINI	AS	-8.64
DreEX0027402	66	LONG	AS	-1.61
DreEX0027403	51	MINI	AS	-5.86
DreEX0027551	103	LONG	AS	-1.64
DreEX0027657	379	LONG	AS	-3.49
DreEX0027676	83	LONG	AS	-1.98
DreEX0027677	39	MINI	MINI_Neural	-55.06
DreEX0027689	27	MIC	AS	-11.54
DreEX0027746	139	LONG	AS	-5.61
DreEX0027747	139	LONG	AS	-6.46
DreEX0027753	51	MINI	AS	-1.58
DreEX0027759	37	MINI	AS	-16.45
DreEX0027766	72	LONG	AS	-0.23
DreEX0027768	36	MINI	MINI_Neural	-2.31
DreEX0027775	12	MIC	AS	-3.99
DreEX0027779	54	LONG	AS	-10.09
DreEX0027783	139	LONG	AS	0
DreEX0027784	139	LONG	LONG_Neural	-7.53
DreEX0027800	45	MINI	AS	-1.56
DreEX0027803	18	MIC	AS	-6.53
DreEX0027818	15	MIC	MIC_Neural	-14.78
DreEX0027841	147	LONG	AS	-4.42
DreEX0027850	69	LONG	AS	1.73
DreEX0027851	132	LONG	AS	-5.26
DreEX0027859	144	LONG	AS	-9.27
DreEX0027861	70	LONG	AS	2.99
DreEX0027862	119	LONG	AS	3.12
DreEX0027874	99	LONG	AS	-15.69
DreEX0027897	24	MIC	AS	-18.03
DreEX0027924	6	MIC	AS	-14.86
DreEX0027925	99	LONG	AS	3.92
DreEX0027926	102	LONG	AS	13.83
DreEX0027937	12	MIC	MIC_Neural	-44.48
DreEX0027943	39	MINI	AS	-0.94
DreEX0027947	93	LONG	AS	-24.08
DreEX0027949	27	MIC	AS	-59.71
DreEX0027951	83	LONG	AS	2.27
DreEX0027963	27	MIC	MIC_Neural	-56.14
DreEX0027964	96	LONG	AS	13.57
DreEX0027997	102	LONG	AS	0.1
DreEX0027998	87	LONG	AS	-14.57
DreEX0028013	18	MIC	AS	-4.51
DreEX0028014	15	MIC	AS	-16.86
DreEX0028015	20	MIC	MIC_Neural	-57.3
DreEX0028016	93	LONG	AS	-9.32
DreEX0028017	90	LONG	AS	0.46
DreEX0028031	8	MIC	MIC_Neural	-69.57
DreEX0028037	42	MINI	AS	-9.3
DreEX0028046	6	MIC	MIC_Neural	-32.82
DreEX0028047	8	MIC	MIC_Neural	-41.84
DreEX0028074	30	MINI	AS	-0.9
DreEX0028114	579	LONG	AS	12.53
DreEX0028143	42	MINI	AS	-4.21
DreEX0028150	42	MINI	AS	-3.74
DreEX0028168	92	LONG	AS	1.72
DreEX0028172	95	LONG	AS	-9.61
DreEX0028330	200	LONG	AS	9.94
DreEX0028341	42	MINI	AS	-4.39
DreEX0028456	21	MIC	AS	-6.6
DreEX0028466	21	MIC	AS	-10.05
DreEX0028469	43	MINI	AS	1.71
DreEX0028475	34	MINI	AS	-2.32
DreEX0028477	75	LONG	AS	-1.4
DreEX0028492	138	LONG	AS	-9.06
DreEX0028498	87	LONG	AS	-4.3
DreEX0028544	75	LONG	AS	-15.09
DreEX0028567	22	MIC	MIC_Neural	-43.79
DreEX0028571	42	MINI	AS	-22.74
DreEX0028594	6	MIC	MIC_Neural	-36.03
DreEX0028600	54	LONG	LONG_Neural	-20.77
DreEX0028604	60	LONG	AS	-14.79
DreEX0028626	93	LONG	AS	0
DreEX0028649	84	LONG	AS	-5.21
DreEX0028673	57	LONG	AS	-2.09
DreEX0028674	33	MINI	AS	-7.13
DreEX0028702	60	LONG	LONG_Neural	-4.8
DreEX0028722	102	LONG	AS	0
DreEX0028761	72	LONG	LONG_Neural	-8.95
DreEX0028766	69	LONG	AS	-7.78
DreEX0028789	35	MINI	AS	-9.76
DreEX0028790	90	LONG	AS	-8.59
DreEX0028872	108	LONG	AS	2.92
DreEX0028898	33	MINI	AS	-7.72
DreEX0028911	40	MINI	AS	-7.29
DreEX0028917	48	MINI	MINI_Neural	-16.17
DreEX0028925	30	MINI	AS	-25.85
DreEX0028995	66	LONG	AS	-0.27
DreEX0029001	44	MINI	MINI_Neural	-9.17
DreEX0029002	842	LONG	AS	-3.91
DreEX0029003	72	LONG	AS	-1.19
DreEX0029018	70	LONG	AS	-8.45
DreEX0029036	57	LONG	AS	-19.76
DreEX0029038	57	LONG	AS	-6.31
DreEX0029058	84	LONG	AS	-16.16
DreEX0029130	75	LONG	AS	-15.23
DreEX0029150	75	LONG	AS	-8.77
DreEX0029151	51	MINI	AS	-30.12
DreEX0029164	302	LONG	LONG_Neural	-4.54
DreEX0029200	63	LONG	AS	-15.64
DreEX0029212	120	LONG	AS	-3.52
DreEX0029214	68	LONG	AS	-7.11
DreEX0029229	93	LONG	LONG_Neural	-17.1
DreEX0029235	180	LONG	AS	-17.5
DreEX0029277	107	LONG	AS	-19.01
DreEX0029283	144	LONG	AS	-12.7
DreEX0029314	150	LONG	AS	-9.52
DreEX0029338	42	MINI	AS	-4.68
DreEX0029412	118	LONG	AS	-1.54
DreEX0029512	130	LONG	AS	-3.25
DreEX0029513	73	LONG	AS	-8.87
DreEX0029521	29	MINI	AS	-2.76
DreEX0029522	160	LONG	AS	-2.41
DreEX0029559	111	LONG	LONG_Neural	-3.64
DreEX0029560	33	MINI	AS	-9.13
DreEX0029590	21	MIC	MIC_Neural	-54.57
DreEX0029593	72	LONG	AS	-0.84
DreEX0029649	60	LONG	LONG_Neural	-4.9
DreEX0029651	104	LONG	AS	1.85
DreEX0029658	39	MINI	AS	-9.07
DreEX0029659	87	LONG	AS	0.86
DreEX0029661	39	MINI	AS	-2.84
DreEX0029706	36	MINI	AS	-11.19
DreEX0029709	42	MINI	MINI_Neural	-29.65
DreEX0029727	24	MIC	AS	-11.28
DreEX0029759	42	MINI	MINI_Neural	-10.23
DreEX0029767	27	MIC	AS	-11.19
DreEX0029768	33	MINI	AS	-17.51
DreEX0029769	27	MIC	AS	1.64
DreEX0029850	9	MIC	MIC_Neural	-61.88
DreEX0029854	103	LONG	AS	-3.73
DreEX0029880	12	MIC	MIC_Neural	-28.73
DreEX0029882	85	LONG	AS	-1.85
DreEX0029883	91	LONG	AS	3.75
DreEX0029899	1341	LONG	AS	-9.93
DreEX0029905	27	MIC	AS	-22.21
DreEX0029926	164	LONG	AS	2.38
DreEX0029935	729	LONG	LONG_Neural	-15.08
DreEX0029941	60	LONG	AS	-0.58
DreEX0029964	59	LONG	AS	0.52
DreEX0029965	59	LONG	AS	-4.95
DreEX0029988	193	LONG	AS	11.76
DreEX0030010	107	LONG	AS	-6.61
DreEX0030023	107	LONG	AS	-23.26
DreEX0030024	153	LONG	AS	16.87
DreEX0030025	143	LONG	AS	-3.01
DreEX0030044	73	LONG	AS	-7.14
DreEX0030045	129	LONG	AS	-6.25
DreEX0030151	201	LONG	AS	-1.37
DreEX0030152	120	LONG	LONG_Neural	-6.99
DreEX0030175	75	LONG	LONG_Neural	2.97
DreEX0030176	39	MINI	MINI_Neural	1.93
DreEX0030177	63	LONG	AS	5.64
DreEX0030178	48	MINI	AS	-17.73
DreEX0030189	116	LONG	AS	-0.87
DreEX0030191	555	LONG	AS	-11.96
DreEX0030205	66	LONG	AS	3.46
DreEX0030211	42	MINI	MINI_Neural	-10.13
DreEX0030237	41	MINI	AS	1.33
DreEX0030289	6	MIC	AS	-17.24
DreEX0030298	658	LONG	AS	0
DreEX0030307	93	LONG	AS	-0.59
DreEX0030424	21	MIC	AS	-15.07
DreEX0030425	72	LONG	AS	-24.74
DreEX0030427	165	LONG	AS	-10.71
DreEX0030456	21	MIC	MIC_Neural	-15.19
DreEX0030461	201	LONG	AS	13.43
DreEX0030462	115	LONG	AS	2.65
DreEX0030463	45	MINI	AS	2.47
DreEX0030464	317	LONG	AS	2.04
DreEX0030465	82	LONG	AS	0
DreEX0030466	71	LONG	AS	12.59
DreEX0030467	130	LONG	AS	5.08
DreEX0030468	185	LONG	AS	-2.13
DreEX0030469	146	LONG	AS	6.76
DreEX0030470	154	LONG	AS	10.1
DreEX0030471	86	LONG	AS	17.92
DreEX0030472	73	LONG	AS	16.15
DreEX0030473	162	LONG	AS	10.69
DreEX0030474	198	LONG	AS	8.13
DreEX0030475	384	LONG	AS	1.75
DreEX0030476	78	LONG	AS	1.99
DreEX0030477	33	MINI	AS	-36.97
DreEX0030484	36	MINI	AS	-6.38
DreEX0030487	17	MIC	MIC_Neural	-19.83
DreEX0030491	53	LONG	AS	-16.86
DreEX0030492	36	MINI	AS	-29.5
DreEX0030493	24	MIC	AS	-70.9
DreEX0030519	237	LONG	AS	-9.93
DreEX0030520	828	LONG	AS	-18.57
DreEX0030521	108	LONG	AS	-14.03
DreEX0030524	95	LONG	AS	-10.54
DreEX0030558	99	LONG	AS	-8
DreEX0030572	9	MIC	AS	-2.09
DreEX0030575	132	LONG	AS	0
DreEX0030577	72	LONG	AS	-6.12
DreEX0030586	12	MIC	MIC_Neural	-37.31
DreEX0030594	12	MIC	AS	-0.22
DreEX0030596	36	MINI	MINI_Neural	-2.31
DreEX0030597	27	MIC	AS	-17.55
DreEX0030598	123	LONG	AS	-15.64
DreEX0030622	93	LONG	AS	-5.63
DreEX0030650	73	LONG	AS	3.16
DreEX0030683	15	MIC	AS	-18.2
DreEX0030749	45	MINI	AS	-3.37
DreEX0030781	9	MIC	AS	-22.88
DreEX0030783	72	LONG	AS	-6.79
DreEX0030811	153	LONG	AS	-1.17
DreEX0030820	129	LONG	AS	-0.62
DreEX0030844	83	LONG	AS	0.51
DreEX0030880	96	LONG	AS	0
DreEX0030881	102	LONG	AS	-28.71
DreEX0030882	63	LONG	AS	-2.62
DreEX0030915	95	LONG	AS	0.76
DreEX0030934	54	LONG	AS	-5.56
DreEX0030978	10	MIC	MIC_Neural	-51.4
DreEX0030980	33	MINI	AS	-10.32
DreEX0030981	144	LONG	AS	-12.73
DreEX0030987	753	LONG	AS	-16.16
DreEX0031023	38	MINI	AS	7.92
DreEX0031030	184	LONG	AS	-10.68
DreEX0031031	257	LONG	AS	-9.28
DreEX0031032	130	LONG	AS	-10.1
DreEX0031033	113	LONG	AS	1.42
DreEX0031034	130	LONG	AS	2.42
DreEX0031035	114	LONG	AS	1.79
DreEX0031047	167	LONG	AS	0
DreEX0031060	45	MINI	AS	-28.94
DreEX0031061	69	LONG	AS	-6.19
DreEX0031062	18	MIC	MIC_Neural	-24.59
DreEX0031112	12	MIC	MIC_Neural	-32.34
DreEX0031113	30	MINI	AS	-16.19
DreEX0031123	12	MIC	AS	-4.77
DreEX0031137	12	MIC	MIC_Neural	-40.47
DreEX0031138	90	LONG	LONG_Neural	-33.87
DreEX0031140	39	MINI	MINI_Neural	-24.9
DreEX0031210	66	LONG	AS	-28.74
DreEX0031232	132	LONG	AS	-0.56
DreEX0031237	101	LONG	AS	-27.05
DreEX0031242	69	LONG	AS	3.95
DreEX0031430	70	LONG	AS	-59.43
DreEX0031467	31	MINI	AS	2.47
DreEX0031485	289	LONG	AS	1.48
DreEX0031519	36	MINI	AS	-6.55
DreEX0031544	78	LONG	AS	10.67
DreEX0031553	66	LONG	AS	-8.19
DreEX0031554	42	MINI	AS	-12.47
DreEX0031557	84	LONG	AS	-22.83
DreEX0031568	147	LONG	AS	0.95
DreEX0031575	69	LONG	AS	-39.65
DreEX0031615	123	LONG	AS	-9.66
DreEX0031617	126	LONG	AS	-3.18
DreEX0031648	51	MINI	AS	-2.27
DreEX0031677	209	LONG	AS	-2.46
DreEX0031737	86	LONG	AS	-21.45
DreEX0031741	76	LONG	AS	-6.11
DreEX0031748	28	MINI	AS	-14.25
DreEX0031755	52	LONG	AS	-16.2
DreEX0031810	52	LONG	AS	-2.75
DreEX0031825	96	LONG	AS	-0.45
DreEX0031826	51	MINI	AS	-8.22
DreEX0031827	66	LONG	AS	-6
DreEX0031829	54	LONG	AS	-30.27
DreEX0031857	80	LONG	AS	-5.28
DreEX0031886	79	LONG	AS	-45.16
DreEX0031915	144	LONG	AS	-23.08
DreEX0032002	117	LONG	AS	0
DreEX0032003	168	LONG	AS	-0.66
DreEX0032020	108	LONG	AS	-3.76
DreEX0032083	172	LONG	AS	-24.84
DreEX0032084	172	LONG	AS	12.81
DreEX0032101	21	MIC	AS	-38.07
DreEX0032102	164	LONG	AS	3.3
DreEX0032103	140	LONG	AS	-23.47
DreEX0032170	43	MINI	AS	-13.71
DreEX0032175	69	LONG	LONG_Neural	-17.77
DreEX0032181	61	LONG	LONG_Neural	-33.52
[truncated: 3,325 more rows]

## Sheet: 2A
EVENT-Gene	Neurons_HuC_72hpf	Brain_Telenc	Cerebellum	Pancreas_BetaCells	Heart_A	Adipose_a	Intestine_A	Kidney_A	Skin	Testis_A	dPSI_N_Z	dPSI_eMIC_Z	dPSI_N_H	dPSI_eMIC_H	dPSI_ASD
DreEX0013683-ap1g1	88.05	88.02	93.29	3.59	1.77	0.91	0.99	1.29	0	0	75.27	-14.98	66.34	58.21	-6.41
DreEX0013846-apbb1	98.87	96.26	96.97	100	2.35	0	0	0	0	9.77	91.13	-51.53	81.28	98.74	-7.29
DreEX0015073-asap1b	98.75	97.41	94.37	86.78	13.02	4.45	0	0	0	1.64	92.58	-61.37	60.01	98.52	-7.48
DreEX0020538-cdon	43.3	3.26	56.2	12.28	0	0	0	0	0	0	12.01	-11.07	66.95	100	-5.16
DreEX0030978-evi5b	82.44	86.36	83.18	21.1	0	1.81	0	0	0	0	75.51	-51.4	53.02	91.22	-19.82
DreEX0035002-gli2b	87.03	5.73	32.74	0	0	NA	0	0	0	0	46.38	-4.91	NA	95.53	NA
DreEX0035009-gli3	94.37	51.47	0	NA	0	0	0	0	0	0	51.95	-13.72	0	13.76	0
DreEX0040386-itsn1	90.92	88.31	88.99	17.95	0	0	0	0	0	0	83.4	-44.94	51.48	87.95	-5.66
DreEX0041536-kif1b	99.34	99.31	99.33	46.77	12.63	10.21	10.2	2	0	3.97	87.86	-30.94	86.13	96.26	-13.28
DreEX0044304-madd	38.27	15.9	15.95	13.81	0	0	0	0	0	0.82	24.05	-39.17	20.81	73.3	-1.9
DreEX0045884-mef2ca	38.2	93.41	100	NA	0.4	0	0	0	0	5.82	89.61	-77.63	93.41	99.03	-2.02
DreEX0007444-reln	83.96	43.83	79.37	NA	9.16	0	0	0	0	0	46.43	-23.39	91.06	NA	-10.84
DreEX0066086-shank3a	95.25	86.07	100	0	0	0	NA	0	NA	0	94.26	-54.68	87.63	100	-1.71
DreEX0066093-shank3b	100	94.05	92.81	89.9	0	0	0	0	0	0	89.99	-29.31	87.63	100	-1.71
DreEX0075047-src	97.53	88.33	94.52	33.33	0	4.76	0	0	0	0	87.62	-24.71	72.52	66.47	-8.78
DreEX0084167-vav2	56.52	59.46	5.04	46.67	0	0	0	0	0	0	54.76	-37.19	45.75	91.7	-13.45
DreEX0084235-vdac3	97.12	91.13	93.44	12.51	25.99	0.1	0.84	0.08	0	0.78	87.58	-40.96	1.61	5.56	-1.64
DreEX0084665-vti1a	73.72	78.62	83.96	2.71	6	0	0	0	0	0	77.19	-49.71	76.48	91.54	-6.51
DreEX0074887-spock3*	98.61	94.53	70.51	90.47	3.54	7.65	8.07	0	38.81	2.08	85.37	-68.26	63.34	NA	-6.05
DreEX0059894-pus7*	91.54	30.43	85.19	0	12.27	0	0	0	0	0	62.63	-26.02	86.64	95.43	-5.67
DreEX0028014-dock7*	93.12	94.66	97.37	14.4	77.38	28.99	25.18	10.72	34.65	2.51	54.46	-16.86	57.57	69.33	-16.22

## Sheet: 2E
Line	dpf	fish_num	size_cm	Genotype	Gene_founder
ap1g1_1	30	1	1.4	HET	ap1g1_1
ap1g1_1	30	2	1.4	HET	ap1g1_1
ap1g1_1	30	3	1.4	DEL	ap1g1_1
ap1g1_1	30	4	1.4	DEL	ap1g1_1
ap1g1_1	30	5	1.3	HET	ap1g1_1
ap1g1_1	30	6	1.1	HET	ap1g1_1
ap1g1_1	30	7	1.3	HET	ap1g1_1
ap1g1_1	30	8	1.3	DEL	ap1g1_1
ap1g1_1	30	9	1.3	HET	ap1g1_1
ap1g1_1	30	10	1.4	DEL	ap1g1_1
ap1g1_1	30	11	1.2	DEL	ap1g1_1
ap1g1_1	30	12	1.2	DEL	ap1g1_1
ap1g1_1	30	13	1.1	HET	ap1g1_1
ap1g1_1	30	14	1.1	HET	ap1g1_1
ap1g1_1	30	15	1.3	HET	ap1g1_1
ap1g1_1	30	16	1.2	HET	ap1g1_1
ap1g1_1	30	17	1.2	HET	ap1g1_1
ap1g1_1	30	18	1.2	DEL	ap1g1_1
ap1g1_1	30	19	1.2	HET	ap1g1_1
ap1g1_1	30	20	1.3	HET	ap1g1_1
ap1g1_1	30	21	1.1	DEL	ap1g1_1
ap1g1_1	30	22	1.1	DEL	ap1g1_1
ap1g1_1	30	23	1.1	DEL	ap1g1_1
ap1g1_1	30	24	1.1	HET	ap1g1_1
ap1g1_1	30	25	1.2	DEL	ap1g1_1
ap1g1_1	30	26	1.2	DEL	ap1g1_1
ap1g1_1	30	27	1.2	DEL	ap1g1_1
ap1g1_1	30	28	1.2	HET	ap1g1_1
ap1g1_1	30	29	1.1	HET	ap1g1_1
ap1g1_1	30	30	1	DEL	ap1g1_1
ap1g1_1	30	31	1.2	HET	ap1g1_1
ap1g1_1	30	32	1.2	HET	ap1g1_1
ap1g1_1	30	33	1.1	DEL	ap1g1_1
ap1g1_1	30	34	1.1	DEL	ap1g1_1
ap1g1_1	30	35	1	DEL	ap1g1_1
ap1g1_1	30	36	1.1	HET	ap1g1_1
ap1g1_1	30	37	1.1	HET	ap1g1_1
ap1g1_1	30	38	1.1	HET	ap1g1_1
ap1g1_1	30	39	1.1	HET	ap1g1_1
ap1g1_1	30	40	1.1	HET	ap1g1_1
ap1g1_1	30	41	1.2	DEL	ap1g1_1
ap1g1_1	30	42	1	DEL	ap1g1_1
ap1g1_1	30	43	1.1	HET	ap1g1_1
ap1g1_1	30	44	1.1	DEL	ap1g1_1
ap1g1_1	30	45	1.1	HET	ap1g1_1
ap1g1_1	30	46	1.1	DEL	ap1g1_1
ap1g1_1	30	47	1	HET	ap1g1_1
ap1g1_1	30	48	0.9	DEL	ap1g1_1
ap1g1_1	30	49	0.95	HET	ap1g1_1
ap1g1_1	30	50	1	DEL	ap1g1_1
ap1g1_1	30	51	1.1	HET	ap1g1_1
ap1g1_1	30	52	1	DEL	ap1g1_1
ap1g1_1	30	53	1	DEL	ap1g1_1
ap1g1_1	30	54	1.05	HET	ap1g1_1
ap1g1_1	30	55	1	DEL	ap1g1_1
ap1g1_1	30	56	1	DEL	ap1g1_1
ap1g1_1	31	57	1	DEL	ap1g1_1
ap1g1_1	31	58	1	HET	ap1g1_1
ap1g1_1	31	59	1	HET	ap1g1_1
ap1g1_1	31	60	1.1	DEL	ap1g1_1
ap1g1_1	31	61	1	DEL	ap1g1_1
ap1g1_1	31	62	1	DEL	ap1g1_1
ap1g1_1	31	63	1	HET	ap1g1_1
ap1g1_1	31	64	1	HET	ap1g1_1
apbb1_1	30	1	1.3	HET	apbb1_1
apbb1_1	30	2	1.3	HET	apbb1_1
apbb1_1	30	3	1.2	DEL	apbb1_1
apbb1_1	30	4	1.25	HET	apbb1_1
apbb1_1	30	5	1.1	HET	apbb1_1
apbb1_1	30	6	1.1	HET	apbb1_1
apbb1_1	30	7	1.3	DEL	apbb1_1
apbb1_1	30	8	1.3	HET	apbb1_1
apbb1_1	30	9	1.2	HET	apbb1_1
apbb1_1	30	10	1.2	DEL	apbb1_1
apbb1_1	30	11	1.3	HET	apbb1_1
apbb1_1	30	12	1.2	DEL	apbb1_1
apbb1_1	30	13	1.25	HET	apbb1_1
apbb1_1	30	14	1.15	DEL	apbb1_1
apbb1_1	30	15	1.3	DEL	apbb1_1
apbb1_1	30	16	1.35	HET	apbb1_1
apbb1_1	30	17	1.2	DEL	apbb1_1
apbb1_1	30	18	1.2	DEL	apbb1_1
apbb1_1	30	19	1.2	DEL	apbb1_1
apbb1_1	30	20	1.25	HET	apbb1_1
apbb1_1	30	21	1.3	HET	apbb1_1
apbb1_1	30	22	1.3	HET	apbb1_1
apbb1_1	30	23	1.2	HET	apbb1_1
apbb1_1	30	24	1.2	HET	apbb1_1
apbb1_1	30	25	1.1	DEL	apbb1_1
apbb1_1	30	26	1	DEL	apbb1_1
apbb1_1	30	27	1.3	HET	apbb1_1
apbb1_1	30	28	1.2	DEL	apbb1_1
apbb1_1	30	29	1.3	DEL	apbb1_1
apbb1_1	30	30	1.4	HET	apbb1_1
apbb1_1	30	31	1.3	DEL	apbb1_1
apbb1_1	30	32	1.2	HET	apbb1_1
apbb1_1	30	33	1.3	DEL	apbb1_1
apbb1_1	30	34	1.4	DEL	apbb1_1
apbb1_1	30	35	1.4	HET	apbb1_1
apbb1_1	30	36	1.3	HET	apbb1_1
apbb1_1	30	37	1.3	DEL	apbb1_1
apbb1_1	30	38	1.3	DEL	apbb1_1
apbb1_1	31	39	1.25	HET	apbb1_1
apbb1_1	31	40	1.3	HET	apbb1_1
apbb1_1	31	41	1.3	DEL	apbb1_1
apbb1_1	31	42	1.3	DEL	apbb1_1
apbb1_1	31	43	1.2	HET	apbb1_1
apbb1_1	31	44	1.15	HET	apbb1_1
apbb1_1	31	45	1.3	DEL	apbb1_1
apbb1_1	31	46	1.35	HET	apbb1_1
apbb1_1	31	47	1.4	HET	apbb1_1
apbb1_1	31	48	1.35	DEL	apbb1_1
apbb1_1	31	49	1.3	HET	apbb1_1
apbb1_1	31	50	1.2	DEL	apbb1_1
asap1b_7_1	30	1	1.3	HET	asap1b_7
asap1b_7_1	30	2	1.3	DEL	asap1b_7
asap1b_7_1	30	3	1.25	DEL	asap1b_7
asap1b_7_1	30	4	1.3	HET	asap1b_7
asap1b_7_1	30	5	1.2	DEL	asap1b_7
asap1b_7_1	30	6	1.2	HET	asap1b_7
asap1b_7_1	30	7	1.3	HET	asap1b_7
asap1b_7_1	30	8	1.2	DEL	asap1b_7
asap1b_7_1	30	9	1.3	HET	asap1b_7
asap1b_7_1	30	10	1.25	DEL	asap1b_7
asap1b_7_1	30	11	1.1	DEL	asap1b_7
asap1b_7_1	30	12	1.2	HET	asap1b_7
asap1b_7_1	30	13	1.3	DEL	asap1b_7
asap1b_7_1	30	14	1.35	DEL	asap1b_7
asap1b_7_1	30	15	1.2	HET	asap1b_7
asap1b_7_1	30	16	1.3	NA	asap1b_7
asap1b_7_1	30	17	1.1	HET	asap1b_7
asap1b_7_1	30	18	1.2	HET	asap1b_7
asap1b_7_1	30	19	1.2	HET	asap1b_7
asap1b_7_1	30	20	1.2	HET	asap1b_7
asap1b_7_1	30	21	1.2	DEL	asap1b_7
asap1b_7_1	30	22	1.3	DEL	asap1b_7
asap1b_7_1	30	23	1.25	DEL	asap1b_7
asap1b_7_1	30	24	1.2	NA	asap1b_7
asap1b_7_1	30	25	1.2	DEL	asap1b_7
asap1b_7_1	30	26	1.25	DEL	asap1b_7
asap1b_7_1	30	27	1.2	HET	asap1b_7
asap1b_7_1	30	28	1.2	HET	asap1b_7
asap1b_7_1	30	29	1.2	HET	asap1b_7
asap1b_7_1	30	30	1.2	DEL	asap1b_7
asap1b_7_1	30	31	1.3	DEL	asap1b_7
asap1b_7_1	30	32	1.3	HET	asap1b_7
asap1b_7_1	30	33	1.15	DEL	asap1b_7
asap1b_7_1	30	34	1.2	DEL	asap1b_7
asap1b_7_1	30	35	1.15	HET	asap1b_7
asap1b_7_1	30	36	1.1	DEL	asap1b_7
asap1b_7_1	30	37	1.2	HET	asap1b_7
asap1b_7_1	30	38	1.2	DEL	asap1b_7
asap1b_7_1	31	39	1.25	DEL	asap1b_7
asap1b_7_1	31	40	1.25	DEL	asap1b_7
asap1b_7_1	31	41	1.3	HET	asap1b_7
asap1b_7_1	31	42	1.25	HET	asap1b_7
asap1b_7_1	31	43	1.2	HET	asap1b_7
asap1b_7_1	31	44	1.2	DEL	asap1b_7
asap1b_7_1	31	45	1.1	DEL	asap1b_7
asap1b_7_1	31	46	1.1	DEL	asap1b_7
asap1b_7_1	31	47	1.2	HET	asap1b_7
asap1b_7_1	31	48	1.25	HET	asap1b_7
asap1b_7_1	31	49	1.2	DEL	asap1b_7
asap1b_7_1	31	50	1.2	HET	asap1b_7
asap1b_7_1	31	51	1.1	HET	asap1b_7
asap1b_7_1	31	52	1.1	DEL	asap1b_7
asap1b_7_1	31	53	1.15	HET	asap1b_7
asap1b_7_1	31	54	1.2	HET	asap1b_7
asap1b_7_1	31	55	1.2	DEL	asap1b_7
asap1b_7_1	31	56	1.2	DEL	asap1b_7
cdon_1	31	1	NA	NA	cdon_1
cdon_1	31	2	NA	NA	cdon_1
cdon_1	31	3	NA	NA	cdon_1
cdon_1	31	4	NA	NA	cdon_1
cdon_1	31	5	NA	NA	cdon_1
cdon_1	31	6	NA	NA	cdon_1
cdon_1	31	7	1.4	DEL	cdon_1
cdon_1	31	8	1.3	HET	cdon_1
cdon_1	31	9	1.5	HET	cdon_1
cdon_1	31	10	1.5	DEL	cdon_1
cdon_1	31	11	1.6	HET	cdon_1
cdon_1	31	12	1.5	HET	cdon_1
cdon_1	31	13	1.3	DEL	cdon_1
cdon_1	31	14	1.3	DEL	cdon_1
cdon_1	31	15	1.3	HET	cdon_1
cdon_1	31	16	1.4	DEL	cdon_1
cdon_1	31	17	1.3	HET	cdon_1
cdon_1	31	18	1.3	DEL	cdon_1
cdon_1	31	19	1.5	HET	cdon_1
cdon_1	31	20	1.4	DEL	cdon_1
cdon_1	31	21	1.3	DEL	cdon_1
cdon_1	31	22	1.3	DEL	cdon_1
cdon_1	31	23	1.2	HET	cdon_1
cdon_1	31	24	1.2	HET	cdon_1
cdon_1	31	25	1.2	DEL	cdon_1
cdon_1	31	26	1.2	HET	cdon_1
cdon_1	31	27	1.3	HET	cdon_1
cdon_1	31	28	1.4	HET	cdon_1
cdon_1	31	29	1.2	DEL	cdon_1
cdon_1	31	30	1.3	DEL	cdon_1
cdon_1	31	31	1.3	DEL	cdon_1
cdon_1	31	32	1.3	HET	cdon_1
cdon_1	31	33	1.3	DEL	cdon_1
cdon_1	31	34	1.4	HET	cdon_1
cdon_1	31	35	1.3	HET	cdon_1
cdon_1	31	36	1.2	DEL	cdon_1
cdon_1	31	37	1.2	DEL	cdon_1
cdon_1	31	38	1.2	DEL	cdon_1
cdon_1	31	39	1.1	HET	cdon_1
cdon_1	31	40	1.1	HET	cdon_1
cdon_1	32	41	1.4	HET	cdon_1
cdon_1	32	42	1.3	DEL	cdon_1
cdon_1	32	43	1.3	HET	cdon_1
cdon_1	32	44	1.4	DEL	cdon_1
cdon_1	32	45	1.5	HET	cdon_1
cdon_1	32	46	1.4	HET	cdon_1
cdon_1	32	47	1.2	HET	cdon_1
cdon_1	32	48	1.2	DEL	cdon_1
cdon_1	32	49	1.3	HET	cdon_1
cdon_1	32	50	1.45	DEL	cdon_1
cdon_1	32	51	1.4	DEL	cdon_1
cdon_1	32	52	1.3	HET	cdon_1
cdon_1	32	53	1.3	HET	cdon_1
cdon_1	32	54	1.3	DEL	cdon_1
cdon_1	32	55	1.3	DEL	cdon_1
cdon_1	32	56	1.4	HET	cdon_1
cdon_1	32	57	1.3	DEL	cdon_1
cdon_1	32	58	1.3	DEL	cdon_1
cdon_1	32	59	1.3	HET	cdon_1
cdon_1	32	60	1.3	HET	cdon_1
cdon_1	32	61	1.4	DEL	cdon_1
cdon_1	32	62	1.4	DEL	cdon_1
cdon_1	32	63	1.3	HET	cdon_1
cdon_1	32	64	1.4	HET	cdon_1
cdon_1	32	65	1.3	HET	cdon_1
cdon_1	32	66	1.3	DEL	cdon_1
cdon_1	32	67	1.3	HET	cdon_1
cdon_1	32	68	1.3	HET	cdon_1
cdon_1	32	69	1.2	HET	cdon_1
cdon_1	32	70	1.2	HET	cdon_1
cdon_1	32	71	1.2	DEL	cdon_1
cdon_1	32	72	1.1	HET	cdon_1
cdon_1	32	73	1.3	DEL	cdon_1
cdon_1	32	74	1.4	DEL	cdon_1
cdon_1	33	75	1.5	DEL	cdon_1
cdon_1	33	76	1.4	DEL	cdon_1
cdon_1	33	77	1.4	DEL	cdon_1
cdon_1	33	78	1.4	DEL	cdon_1
cdon_1	33	79	1.5	DEL	cdon_1
cdon_1	33	80	1.6	HET	cdon_1
cdon_1	33	81	1.5	DEL	cdon_1
cdon_1	33	82	1.5	DEL	cdon_1
cdon_1	33	83	1.4	HET	cdon_1
cdon_1	33	84	1.5	HET	cdon_1
cdon_1	33	85	1.5	DEL	cdon_1
cdon_1	33	86	1.3	HET	cdon_1
cdon_1	33	87	1.4	HET	cdon_1
cdon_1	33	88	1.3	HET	cdon_1
cdon_1	33	89	1.4	HET	cdon_1
cdon_1	33	90	1.3	DEL	cdon_1
cdon_1	33	91	1.3	HET	cdon_1
cdon_1	33	92	1.4	HET	cdon_1
evi5b_3_1	30	1	1.4	WT	evi5b_3
evi5b_3_1	30	2	1.2	DEL	evi5b_3
evi5b_3_1	30	3	1.4	DEL	evi5b_3
evi5b_3_1	30	4	1.4	HET	evi5b_3
evi5b_3_1	30	5	1.2	WT	evi5b_3
evi5b_3_1	30	6	1.2	WT	evi5b_3
evi5b_3_1	30	7	1.3	HET	evi5b_3
evi5b_3_1	30	8	1.3	HET	evi5b_3
evi5b_3_1	30	9	1.3	HET	evi5b_3
evi5b_3_1	30	10	1.4	DEL	evi5b_3
evi5b_3_1	30	11	1.3	HET	evi5b_3
evi5b_3_1	30	12	1.3	HET	evi5b_3
evi5b_3_1	31	13	1.2	WT	evi5b_3
evi5b_3_1	31	14	1.3	DEL	evi5b_3
evi5b_3_1	31	15	1.3	HET	evi5b_3
evi5b_3_1	31	16	1.3	HET	evi5b_3
evi5b_3_1	31	17	1.2	HET	evi5b_3
evi5b_3_1	31	18	1.2	HET	evi5b_3
evi5b_3_1	31	19	1.2	WT	evi5b_3
evi5b_3_1	31	20	1.2	DEL	evi5b_3
evi5b_3_1	31	21	1.3	HET	evi5b_3
evi5b_3_1	31	22	1.2	HET	evi5b_3
evi5b_3_1	31	23	1.2	WT	evi5b_3
evi5b_3_1	31	24	1.2	WT	evi5b_3
evi5b_3_1	31	25	1.4	WT	evi5b_3
evi5b_3_1	31	26	1.2	HET	evi5b_3
evi5b_3_1	31	27	1.3	WT	evi5b_3
evi5b_3_1	31	28	1.3	WT	evi5b_3
evi5b_3_1	31	29	1.1	DEL	evi5b_3
evi5b_3_1	31	30	1.2	HET	evi5b_3
evi5b_3_1	31	31	1.2	DEL	evi5b_3
evi5b_3_1	31	32	1.1	HET	evi5b_3
evi5b_3_1	31	33	1.1	WT	evi5b_3
evi5b_3_1	31	34	1.2	HET	evi5b_3
evi5b_3_1	31	35	1.2	HET	evi5b_3
evi5b_3_1	31	36	1.2	WT	evi5b_3
evi5b_3_1	31	37	1	DEL	evi5b_3
evi5b_3_1	31	38	1.1	HET	evi5b_3
evi5b_3_1	31	39	1.2	HET	evi5b_3
evi5b_3_1	31	40	1.2	WT	evi5b_3
evi5b_3_1	31	41	1.2	HET	evi5b_3
evi5b_3_1	31	42	1	WT	evi5b_3
evi5b_3_1	31	43	1	HET	evi5b_3
evi5b_3_1	31	44	1	HET	evi5b_3
evi5b_3_1	31	45	1.1	WT	evi5b_3
evi5b_3_1	31	46	1.1	HET	evi5b_3
evi5b_3_1	31	47	1	DEL	evi5b_3
evi5b_3_1	31	48	1	DEL	evi5b_3
evi5b_3_1	31	49	1	NA	evi5b_3
evi5b_3_1	31	50	1	NA	evi5b_3
evi5b_6_1	30	1	1.4	DEL	evi5b_6
evi5b_6_1	30	2	1.3	DEL	evi5b_6
evi5b_6_1	30	3	1.4	HET	evi5b_6
evi5b_6_1	30	4	1.5	HET	evi5b_6
evi5b_6_1	30	5	1.3	DEL	evi5b_6
evi5b_6_1	30	6	1.4	DEL	evi5b_6
evi5b_6_1	30	7	1.3	HET	evi5b_6
evi5b_6_1	30	8	1.3	DEL	evi5b_6
evi5b_6_1	30	9	1.4	DEL	evi5b_6
evi5b_6_1	30	10	1.5	HET	evi5b_6
evi5b_6_1	30	11	1.4	DEL	evi5b_6
evi5b_6_1	30	12	1.3	HET	evi5b_6
evi5b_6_1	30	13	1.4	DEL	evi5b_6
evi5b_6_1	30	14	1.4	HET	evi5b_6
evi5b_6_1	30	15	1.2	DEL	evi5b_6
evi5b_6_1	30	16	1.3	HET	evi5b_6
evi5b_6_1	30	17	1.4	DEL	evi5b_6
evi5b_6_1	30	18	1.4	DEL	evi5b_6
evi5b_6_1	30	19	1.35	DEL	evi5b_6
evi5b_6_1	30	20	1.35	HET	evi5b_6
evi5b_6_1	30	21	1.25	HET	evi5b_6
evi5b_6_1	30	22	1.3	DEL	evi5b_6
evi5b_6_1	30	23	1.35	DEL	evi5b_6
evi5b_6_1	30	24	1.4	HET	evi5b_6
evi5b_6_1	30	25	1.4	DEL	evi5b_6
evi5b_6_1	30	26	1.3	DEL	evi5b_6
evi5b_6_1	30	27	1.35	DEL	evi5b_6
evi5b_6_1	30	28	1.3	DEL	evi5b_6
evi5b_6_1	30	29	1.4	DEL	evi5b_6
evi5b_6_1	30	30	1.4	DEL	evi5b_6
evi5b_6_1	30	31	1.2	HET	evi5b_6
evi5b_6_1	30	32	1.25	DEL	evi5b_6
evi5b_6_1	30	33	1.4	HET	evi5b_6
evi5b_6_1	30	34	1.3	DEL	evi5b_6
evi5b_6_1	30	35	1.3	HET	evi5b_6
evi5b_6_1	30	36	1.3	DEL	evi5b_6
evi5b_6_1	30	37	1.3	DEL	evi5b_6
evi5b_6_1	30	38	1.4	HET	evi5b_6
evi5b_6_1	31	39	1.3	HET	evi5b_6
evi5b_6_1	31	40	1.4	DEL	evi5b_6
evi5b_6_1	31	41	1.4	DEL	evi5b_6
evi5b_6_1	31	42	1.3	HET	evi5b_6
evi5b_6_1	31	43	1.2	DEL	evi5b_6
evi5b_6_1	31	44	1.25	HET	evi5b_6
evi5b_6_2	31	1	1.3	HET	evi5b_6
evi5b_6_2	31	2	1.3	DEL	evi5b_6
evi5b_6_2	31	3	1.35	DEL	evi5b_6
evi5b_6_2	31	4	1.35	DEL	evi5b_6
evi5b_6_2	31	5	1.3	DEL	evi5b_6
evi5b_6_2	31	6	1.3	DEL	evi5b_6
evi5b_6_2	31	7	1.4	DEL	evi5b_6
evi5b_6_2	31	8	1.4	HET	evi5b_6
evi5b_6_2	31	9	1.3	HET	evi5b_6
evi5b_6_2	31	10	1.3	HET	evi5b_6
evi5b_6_2	31	11	1.3	HET	evi5b_6
evi5b_6_2	31	12	1.3	DEL	evi5b_6
evi5b_6_2	31	13	1.3	HET	evi5b_6
evi5b_6_2	31	14	NA	NA	evi5b_6
evi5b_6_2	31	15	1.2	HET	evi5b_6
evi5b_6_2	31	16	1.2	DEL	evi5b_6
evi5b_6_2	31	17	1.3	DEL	evi5b_6
evi5b_6_2	31	18	1.2	DEL	evi5b_6
evi5b_6_2	31	19	1.2	DEL	evi5b_6
evi5b_6_2	31	20	1.2	HET	evi5b_6
evi5b_6_2	31	21	1.4	HET	evi5b_6
evi5b_6_2	31	22	1.3	DEL	evi5b_6
evi5b_6_2	31	23	1.3	DEL	evi5b_6
evi5b_6_2	31	24	1.3	HET	evi5b_6
evi5b_6_2	31	25	1.3	HET	evi5b_6
evi5b_6_2	31	26	1.3	HET	evi5b_6
evi5b_6_2	31	27	1.3	HET	evi5b_6
evi5b_6_2	31	28	1.3	HET	evi5b_6
evi5b_6_2	31	29	1.3	HET	evi5b_6
evi5b_6_2	31	30	1.2	DEL	evi5b_6
evi5b_6_2	31	31	1.3	HET	evi5b_6
evi5b_6_2	31	32	1.3	HET	evi5b_6
evi5b_6_2	31	33	1.2	DEL	evi5b_6
evi5b_6_2	31	34	1.1	HET	evi5b_6
evi5b_6_2	31	35	1.2	HET	evi5b_6
evi5b_6_2	31	36	1.3	HET	evi5b_6
evi5b_6_2	31	37	1.2	HET	evi5b_6
evi5b_6_2	31	38	1.2	HET	evi5b_6
evi5b_6_2	31	39	1.2	DEL	evi5b_6
evi5b_6_2	31	40	1.2	HET	evi5b_6
evi5b_6_2	31	41	1.2	DEL	evi5b_6
evi5b_6_2	31	42	1.2	DEL	evi5b_6
evi5b_6_2	31	43	1.2	HET	evi5b_6
evi5b_6_2	31	44	1.1	DEL	evi5b_6
evi5b_6_2	31	45	1.1	HET	evi5b_6
evi5b_6_2	31	46	1.1	DEL	evi5b_6
evi5b_6_2	31	47	1.1	HET	evi5b_6
evi5b_6_2	31	48	1	DEL	evi5b_6
evi5b_6_2	32	49	1.3	HET	evi5b_6
evi5b_6_2	32	50	1.3	HET	evi5b_6
evi5b_6_2	32	51	1.3	HET	evi5b_6
evi5b_6_2	32	52	1.3	DEL	evi5b_6
evi5b_6_2	32	53	1.2	HET	evi5b_6
evi5b_6_2	32	54	1.3	DEL	evi5b_6
evi5b_6_2	32	55	1.2	HET	evi5b_6
evi5b_6_2	32	56	1.2	HET	evi5b_6
evi5b_6_2	32	57	1.3	DEL	evi5b_6
evi5b_6_2	32	58	1.4	HET	evi5b_6
evi5b_6_2	32	59	1.3	HET	evi5b_6
evi5b_6_2	32	60	1.3	DEL	evi5b_6
evi5b_6_2	32	61	1.2	DEL	evi5b_6
evi5b_6_2	32	62	1.2	DEL	evi5b_6
evi5b_6_2	32	63	1.2	DEL	evi5b_6
evi5b_6_2	32	64	1.2	DEL	evi5b_6
evi5b_6_2	32	65	1.2	DEL	evi5b_6
evi5b_6_2	32	66	1.2	HET	evi5b_6
evi5b_6_2	32	67	1.2	HET	evi5b_6
evi5b_6_2	32	68	1.2	DEL	evi5b_6
evi5b_6_2	32	69	1.2	HET	evi5b_6
evi5b_6_2	32	70	1.2	DEL	evi5b_6
evi5b_6_2	32	71	1.2	HET	evi5b_6
evi5b_6_2	32	72	1.2	HET	evi5b_6
evi5b_6_2	32	73	1.2	DEL	evi5b_6
evi5b_6_2	32	74	1.2	HET	evi5b_6
evi5b_6_2	32	75	1.1	HET	evi5b_6
evi5b_6_2	32	76	1.2	DEL	evi5b_6
evi5b_6_2	32	77	1.1	HET	evi5b_6
evi5b_6_2	32	78	1.1	HET	evi5b_6
evi5b_6_2	32	79	1.2	DEL	evi5b_6
evi5b_6_2	32	80	1.2	HET	evi5b_6
evi5b_6_2	32	81	1.2	DEL	evi5b_6
evi5b_6_2	32	82	1.1	HET	evi5b_6
evi5b_6_2	32	83	1.1	DEL	evi5b_6
evi5b_6_2	32	84	1.1	HET	evi5b_6
evi5b_6_2	32	85	1	HET	evi5b_6
evi5b_6_2	32	86	1	HET	evi5b_6
evi5b_6_2	32	87	0.9	DEL	evi5b_6
evi5b_6_2	32	88	1.1	HET	evi5b_6
evi5b_6_2	32	89	1.1	HET	evi5b_6
evi5b_6_2	32	90	1.1	HET	evi5b_6
evi5b_6_2	32	91	1.1	HET	evi5b_6
evi5b_6_2	32	92	0.9	HET	evi5b_6
gli2b_1_1	30	1	1.2	NA	gli2b_1
gli2b_1_1	30	2	1.15	DEL	gli2b_1
gli2b_1_1	30	3	1.3	NA	gli2b_1
gli2b_1_1	30	4	1.3	DEL	gli2b_1
gli2b_1_1	30	5	1.4	HET	gli2b_1
gli2b_1_1	30	6	1.35	DEL	gli2b_1
gli2b_1_1	30	7	1.35	HET	gli2b_1
gli2b_1_1	30	8	1.3	DEL	gli2b_1
gli2b_1_1	30	9	1.3	DEL	gli2b_1
gli2b_1_1	30	10	1.3	DEL	gli2b_1
gli2b_1_1	30	11	1.3	HET	gli2b_1
gli2b_1_1	30	12	1.2	DEL	gli2b_1
gli2b_1_1	30	13	1.15	HET	gli2b_1
gli2b_1_1	30	14	1.2	DEL	gli2b_1
gli2b_1_1	30	15	1.15	HET	gli2b_1
gli2b_1_1	30	16	1.15	HET	gli2b_1
gli2b_1_1	30	17	1.2	DEL	gli2b_1
gli2b_1_1	30	18	1.2	HET	gli2b_1
gli2b_1_1	30	19	1.3	HET	gli2b_1
gli2b_1_1	30	20	1.2	DEL	gli2b_1
gli2b_1_1	30	21	1.35	HET	gli2b_1
gli2b_1_1	30	22	1.3	DEL	gli2b_1
gli2b_1_1	30	23	1.3	DEL	gli2b_1
gli2b_1_1	30	24	1.35	DEL	gli2b_1
gli2b_1_1	30	25	1.35	DEL	gli2b_1
gli2b_1_1	30	26	1.4	DEL	gli2b_1
gli2b_1_1	30	27	1.3	DEL	gli2b_1
gli2b_1_1	30	28	1.2	DEL	gli2b_1
gli2b_1_1	30	29	1.3	DEL	gli2b_1
gli2b_1_1	30	30	1.2	HET	gli2b_1
gli2b_1_1	30	31	1.35	HET	gli2b_1
gli2b_1_1	30	32	1.2	HET	gli2b_1
gli2b_1_1	30	33	1.2	DEL	gli2b_1
gli2b_1_1	30	34	1.3	HET	gli2b_1
gli2b_1_1	30	35	1.2	DEL	gli2b_1
gli2b_1_1	30	36	1.2	DEL	gli2b_1
gli2b_1_1	31	37	1.45	DEL	gli2b_1
gli2b_1_1	31	38	1.35	DEL	gli2b_1
gli2b_1_1	31	39	1.35	DEL	gli2b_1
gli2b_1_1	31	40	1.3	DEL	gli2b_1
gli2b_1_1	31	41	1.2	NA	gli2b_1
gli2b_1_1	31	42	1.2	DEL	gli2b_1
gli2b_1_1	31	43	1.3	DEL	gli2b_1
gli2b_1_1	31	44	1.4	HET	gli2b_1
gli2b_1_1	31	45	1.35	DEL	gli2b_1
gli2b_1_1	31	46	1.35	HET	gli2b_1
gli2b_1_1	31	47	1.2	DEL	gli2b_1
gli2b_1_1	31	48	1.3	HET	gli2b_1
gli2b_1_1	31	49	1.4	HET	gli2b_1
gli2b_1_1	31	50	1.35	HET	gli2b_1
gli2b_1_1	31	51	1.2	HET	gli2b_1
gli2b_1_1	31	52	1.2	HET	gli2b_1
gli2b_1_1	30	1	1.2	DEL	gli2b_1
gli2b_1_1	30	2	1.2	DEL	gli2b_1
gli2b_1_1	30	3	1.3	HET	gli2b_1
gli2b_1_1	30	4	1.2	DEL	gli2b_1
gli2b_1_1	30	5	1.2	DEL	gli2b_1
gli2b_1_1	30	6	1.2	HET	gli2b_1
gli2b_1_1	30	7	1.2	HET	gli2b_1
gli2b_1_1	30	8	1.2	DEL	gli2b_1
gli2b_1_1	30	9	1.3	HET	gli2b_1
gli2b_1_1	30	10	1.4	DEL	gli2b_1
gli2b_1_1	30	11	1.3	DEL	gli2b_1
gli2b_1_1	30	12	1.3	DEL	gli2b_1
gli2b_1_1	30	13	1.25	DEL	gli2b_1
gli2b_1_1	30	14	1.25	DEL	gli2b_1
gli2b_1_1	30	15	1.2	DEL	gli2b_1
gli2b_1_1	30	16	1.3	DEL	gli2b_1
gli2b_1_1	30	17	1.2	DEL	gli2b_1
gli2b_1_1	30	18	1.3	DEL	gli2b_1
gli2b_1_1	30	19	1.1	HET	gli2b_1
gli2b_1_1	30	20	1.2	DEL	gli2b_1
gli2b_1_1	30	21	1.2	HET	gli2b_1
gli2b_1_1	30	22	1.2	DEL	gli2b_1
gli2b_1_1	30	23	1.3	HET	gli2b_1
gli2b_1_1	30	24	1.2	HET	gli2b_1
gli2b_1_1	30	25	1.35	HET	gli2b_1
gli2b_1_1	30	26	1.4	HET	gli2b_1
gli2b_1_1	30	27	1.2	HET	gli2b_1
gli2b_1_1	30	28	1.2	HET	gli2b_1
gli2b_1_1	30	29	1.2	DEL	gli2b_1
gli2b_1_1	30	30	1.2	HET	gli2b_1
gli2b_1_1	30	31	1.2	DEL	gli2b_1
gli2b_1_1	30	32	1.2	HET	gli2b_1
gli2b_1_1	30	33	1.2	DEL	gli2b_1
gli2b_1_1	30	34	1.2	HET	gli2b_1
gli2b_1_1	30	35	1.2	DEL	gli2b_1
gli2b_1_1	30	36	1.2	HET	gli2b_1
gli2b_1_1	30	37	1.1	DEL	gli2b_1
gli2b_1_1	30	38	1.1	DEL	gli2b_1
gli2b_1_1	30	39	1.2	DEL	gli2b_1
gli2b_1_1	30	40	1.2	HET	gli2b_1
gli2b_1_2	31	41	1.2	HET	gli2b_1
gli2b_1_2	31	42	1.2	DEL	gli2b_1
gli2b_1_2	31	43	1.3	DEL	gli2b_1
gli2b_1_2	31	44	1.25	HET	gli2b_1
gli2b_1_2	31	45	1.1	HET	gli2b_1
gli2b_1_2	31	46	1.1	DEL	gli2b_1
gli2b_1_2	31	47	1.4	DEL	gli2b_1
gli2b_1_2	31	48	1.3	HET	gli2b_1
gli2b_1_2	31	49	1.3	DEL	gli2b_1
gli2b_1_2	31	50	1.3	DEL	gli2b_1
gli2b_1_2	31	51	1.2	HET	gli2b_1
gli2b_1_2	31	52	1.2	HET	gli2b_1
gli2b_1_2	31	53	1.2	DEL	gli2b_1
gli2b_1_2	31	54	1.2	HET	gli2b_1
gli2b_1_2	31	55	1.1	DEL	gli2b_1
gli2b_1_2	31	56	1.1	DEL	gli2b_1
gli2b_1_2	31	57	1.2	HET	gli2b_1
gli2b_1_2	31	58	1.3	DEL	gli2b_1
gli2b_1_2	31	59	1.2	HET	gli2b_1
gli2b_1_2	31	60	1.2	HET	gli2b_1
gli2b_1_2	31	61	1.2	HET	gli2b_1
gli2b_1_2	31	62	1.2	HET	gli2b_1
gli2b_1_2	31	63	1	HET	gli2b_1
gli2b_1_2	31	64	1.2	HET	gli2b_1
gli2b_1_2	31	65	1.2	HET	gli2b_1
gli2b_1_2	31	66	1.2	DEL	gli2b_1
gli2b_1_2	31	67	1.1	DEL	gli2b_1
gli2b_1_2	31	68	1.1	HET	gli2b_1
gli2b_1_2	31	69	1.1	DEL	gli2b_1
gli2b_1_2	31	70	1.1	DEL	gli2b_1
gli2b_1_2	31	71	1.1	HET	gli2b_1
gli2b_1_2	31	72	1.1	HET	gli2b_1
gli2b_1_2	31	73	1.1	DEL	gli2b_1
gli2b_1_2	31	74	1.2	HET	gli2b_1
gli2b_1_2	31	75	1.2	DEL	gli2b_1
gli2b_1_2	31	76	1.2	HET	gli2b_1
gli2b_1_2	31	77	1.1	DEL	gli2b_1
gli2b_1_2	31	78	1.1	DEL	gli2b_1
gli2b_1_2	31	79	1	HET	gli2b_1
gli2b_1_2	31	80	1	HET	gli2b_1
gli2b_1_2	31	81	1.1	HET	gli2b_1
gli2b_1_2	31	82	1.1	DEL	gli2b_1
gli2b_1_2	31	83	1	DEL	gli2b_1
gli2b_1_2	31	84	1	DEL	gli2b_1
gli2b_1_2	31	85	1.1	HET	gli2b_1
gli2b_1_2	31	86	1.1	DEL	gli2b_1
gli2b_1_2	31	87	1.1	HET	gli2b_1
gli2b_1_2	31	88	1	HET	gli2b_1
gli2b_1_2	31	89	1	HET	gli2b_1
gli2b_1_2	31	90	1	HET	gli2b_1
gli2b_1_2	31	91	1	DEL	gli2b_1
gli2b_1_2	31	92	0.9	HET	gli2b_1
gli3_7_1	30	1	1.2	HET	gli3_7
gli3_7_1	30	2	1.1	DEL	gli3_7
gli3_7_1	30	3	1.3	NA	gli3_7
gli3_7_1	30	4	1.3	HET	gli3_7
gli3_7_1	30	5	1.25	DEL	gli3_7
gli3_7_1	30	6	1.2	HET	gli3_7
gli3_7_1	30	7	1.2	DEL	gli3_7
gli3_7_1	30	8	1.2	NA	gli3_7
gli3_7_1	30	9	1.1	HET	gli3_7
gli3_7_1	30	10	1.05	HET	gli3_7
gli3_7_1	30	11	1.25	DEL	gli3_7
gli3_7_1	30	12	1.35	HET	gli3_7
gli3_7_1	30	13	1.1	HET	gli3_7
gli3_7_1	30	14	1.1	DEL	gli3_7
gli3_7_1	30	15	1	HET	gli3_7
gli3_7_1	30	16	0.9	DEL	gli3_7
gli3_7_1	30	17	0.9	DEL	gli3_7
gli3_7_1	30	18	0.9	HET	gli3_7
gli3_7_1	30	19	1.2	HET	gli3_7
gli3_7_1	30	20	1.1	HET	gli3_7
gli3_7_1	30	21	1.3	HET	gli3_7
gli3_7_1	30	22	1.4	DEL	gli3_7
gli3_7_1	30	23	1.2	HET	gli3_7
gli3_7_1	30	24	1.1	HET	gli3_7
gli3_7_1	30	25	0.9	HET	gli3_7
gli3_7_1	30	26	0.8	DEL	gli3_7
gli3_7_1	30	27	1.4	HET	gli3_7
gli3_7_1	30	28	1.3	DEL	gli3_7
gli3_7_1	30	29	1.3	DEL	gli3_7
gli3_7_1	30	30	1.3	HET	gli3_7
gli3_7_1	30	31	1.3	HET	gli3_7
gli3_7_1	30	32	1.2	HET	gli3_7
gli3_7_1	30	33	0.8	HET	gli3_7
gli3_7_1	30	34	0.9	DEL	gli3_7
gli3_7_1	30	35	0.9	HET	gli3_7
gli3_7_1	30	36	1.2	DEL	gli3_7
gli3_7_2	31	1	1.3	DEL	gli3_7
gli3_7_2	31	2	1.4	HET	gli3_7
gli3_7_2	31	3	1.4	HET	gli3_7
gli3_7_2	31	4	1.3	HET	gli3_7
gli3_7_2	31	5	1.5	DEL	gli3_7
gli3_7_2	31	6	1.5	HET	gli3_7
gli3_7_2	31	7	1.3	HET	gli3_7
gli3_7_2	31	8	1.4	DEL	gli3_7
gli3_7_2	31	9	1.5	HET	gli3_7
gli3_7_2	31	10	1.4	DEL	gli3_7
gli3_7_2	31	11	1.4	DEL	gli3_7
gli3_7_2	31	12	1.3	DEL	gli3_7
gli3_7_2	31	13	1.5	HET	gli3_7
gli3_7_2	31	14	1.5	HET	gli3_7
gli3_7_2	31	15	1.3	DEL	gli3_7
gli3_7_2	31	16	1.4	DEL	gli3_7
gli3_7_2	31	17	1.4	HET	gli3_7
gli3_7_2	31	18	1.3	HET	gli3_7
gli3_7_2	31	19	1.2	HET	gli3_7
gli3_7_2	31	20	1.2	HET	gli3_7
gli3_7_2	31	21	1.5	HET	gli3_7
gli3_7_2	31	22	1.4	HET	gli3_7
gli3_7_2	31	23	1.3	HET	gli3_7
gli3_7_2	31	24	1.4	HET	gli3_7
gli3_7_2	31	25	1.5	HET	gli3_7
gli3_7_2	31	26	1.4	HET	gli3_7
gli3_7_2	31	27	1.3	DEL	gli3_7
gli3_7_2	31	28	1.3	HET	gli3_7
gli3_7_2	31	29	1.3	HET	gli3_7
gli3_7_2	31	30	1.2	DEL	gli3_7
gli3_7_2	31	31	1.3	HET	gli3_7
gli3_7_2	31	32	1.4	DEL	gli3_7
gli3_7_2	31	33	1.3	HET	gli3_7
gli3_7_2	31	34	1.3	HET	gli3_7
gli3_7_2	31	35	1.2	HET	gli3_7
gli3_7_2	31	36	1.1	HET	gli3_7
gli3_7_2	31	37	1.4	HET	gli3_7
gli3_7_2	31	38	1.3	HET	gli3_7
gli3_7_2	31	39	1.2	HET	gli3_7
gli3_7_2	31	40	1.3	HET	gli3_7
gli3_7_2	31	41	1.3	HET	gli3_7
gli3_7_2	31	42	1.2	HET	gli3_7
gli3_7_2	31	43	1.1	HET	gli3_7
gli3_7_2	31	44	1	DEL	gli3_7
gli3_7_2	32	45	1.4	HET	gli3_7
gli3_7_2	32	46	1.3	HET	gli3_7
gli3_7_2	32	47	1.3	HET	gli3_7
gli3_7_2	32	48	1.2	DEL	gli3_7
gli3_7_2	32	49	1.4	HET	gli3_7
gli3_7_2	32	50	1.4	HET	gli3_7
gli3_7_2	32	51	1.3	HET	gli3_7
gli3_7_2	32	52	1.3	DEL	gli3_7
gli3_7_2	32	53	1.4	HET	gli3_7
gli3_7_2	32	54	1.4	HET	gli3_7
gli3_7_2	32	55	1.3	DEL	gli3_7
gli3_7_2	32	56	1.45	HET	gli3_7
gli3_7_2	32	57	1.2	DEL	gli3_7
gli3_7_2	32	58	1.3	HET	gli3_7
gli3_7_2	32	59	1.2	DEL	gli3_7
gli3_7_2	32	60	1.3	HET	gli3_7
gli3_7_2	32	61	1.2	HET	gli3_7
gli3_7_2	32	62	1.2	HET	gli3_7
gli3_7_2	32	63	1.3	HET	gli3_7
gli3_7_2	32	64	1.2	HET	gli3_7
gli3_7_2	32	65	1.2	HET	gli3_7
gli3_7_2	32	66	1.3	DEL	gli3_7
gli3_7_2	32	67	1.1	HET	gli3_7
gli3_7_2	32	68	1.1	DEL	gli3_7
gli3_7_2	32	69	1.2	DEL	gli3_7
gli3_7_2	32	70	1.1	HET	gli3_7
gli3_7_2	32	71	1.2	DEL	gli3_7
gli3_7_2	32	72	1.1	DEL	gli3_7
gli3_7_2	32	73	1.1	HET	gli3_7
gli3_7_2	32	74	1	DEL	gli3_7
gli3_7_2	32	75	1.1	HET	gli3_7
gli3_7_2	32	76	1.1	HET	gli3_7
gli3_7_2	32	77	1.1	DEL	gli3_7
gli3_7_2	32	78	1.1	HET	gli3_7
gli3_7_2	32	79	1	DEL	gli3_7
gli3_7_2	32	80	1	HET	gli3_7
Itsn1_1	30	1	1.3	DEL	itsn1_1
Itsn1_1	30	2	1.3	HET	itsn1_1
Itsn1_1	30	3	1.3	DEL	itsn1_1
Itsn1_1	30	4	1.3	HET	itsn1_1
Itsn1_1	30	5	1.4	DEL	itsn1_1
Itsn1_1	30	6	1.3	DEL	itsn1_1
Itsn1_1	30	7	1.3	DEL	itsn1_1
Itsn1_1	30	8	1.3	HET	itsn1_1
Itsn1_1	30	9	1.3	HET	itsn1_1
Itsn1_1	30	10	1.3	DEL	itsn1_1
Itsn1_1	30	11	1.3	DEL	itsn1_1
Itsn1_1	30	12	1.3	HET	itsn1_1
Itsn1_1	30	13	1.2	HET	itsn1_1
Itsn1_1	30	14	1.3	DEL	itsn1_1
Itsn1_1	30	15	1.3	HET	itsn1_1
Itsn1_1	30	16	1.4	HET	itsn1_1
Itsn1_1	30	17	1.2	HET	itsn1_1
Itsn1_1	30	18	1.2	DEL	itsn1_1
Itsn1_1	30	19	1.3	DEL	itsn1_1
Itsn1_1	30	20	1.3	HET	itsn1_1
Itsn1_1	30	21	1.3	DEL	itsn1_1
Itsn1_1	30	22	1.4	HET	itsn1_1
Itsn1_1	30	23	1.2	HET	itsn1_1
Itsn1_1	30	24	1.2	HET	itsn1_1
Itsn1_1	30	25	1.4	HET	itsn1_1
Itsn1_1	30	26	1.4	HET	itsn1_1
Itsn1_1	30	27	1.3	DEL	itsn1_1
Itsn1_1	30	28	1.3	HET	itsn1_1
Itsn1_1	30	29	1.2	DEL	itsn1_1
Itsn1_1	30	30	1.2	HET	itsn1_1
Itsn1_1	30	31	1.3	HET	itsn1_1
Itsn1_1	30	32	1.2	DEL	itsn1_1
Itsn1_1	30	33	1.3	HET	itsn1_1
Itsn1_1	30	34	1.3	HET	itsn1_1
Itsn1_1	30	35	1.3	HET	itsn1_1
Itsn1_1	30	36	1.3	DEL	itsn1_1
Itsn1_1	30	37	1.2	HET	itsn1_1
Itsn1_1	30	38	1.3	DEL	itsn1_1
Itsn1_1	30	39	1.2	HET	itsn1_1
Itsn1_1	30	40	1.2	DEL	itsn1_1
Itsn1_1	30	41	1.3	DEL	itsn1_1
Itsn1_1	30	42	1.3	HET	itsn1_1
Itsn1_1	30	43	1.2	DEL	itsn1_1
Itsn1_1	30	44	1.2	HET	itsn1_1
Itsn1_1	30	45	1.2	DEL	itsn1_1
Itsn1_1	30	46	1.2	DEL	itsn1_1
Itsn1_1	30	47	1.2	HET	itsn1_1
Itsn1_1	30	48	1.2	HET	itsn1_1
Itsn1_1	31	49	1.3	DEL	itsn1_1
Itsn1_1	31	50	1.3	HET	itsn1_1
Itsn1_1	31	51	1.2	DEL	itsn1_1
Itsn1_1	31	52	1.3	DEL	itsn1_1
Itsn1_1	31	53	1.3	DEL	itsn1_1
Itsn1_1	31	54	1.2	DEL	itsn1_1
Itsn1_1	31	55	1.3	HET	itsn1_1
Itsn1_1	31	56	1.3	HET	itsn1_1
Itsn1_1	31	57	1.4	HET	itsn1_1
Itsn1_1	31	58	1.3	DEL	itsn1_1
Itsn1_1	31	59	1.3	HET	itsn1_1
Itsn1_1	31	60	1.4	DEL	itsn1_1
Itsn1_1	31	61	1.3	HET	itsn1_1
Itsn1_1	31	62	1.3	HET	itsn1_1
Itsn1_1	31	63	1.2	DEL	itsn1_1
Itsn1_1	31	64	1.2	DEL	itsn1_1
Itsn1_1	31	65	1.2	DEL	itsn1_1
Itsn1_1	31	66	1.3	DEL	itsn1_1
Itsn1_1	31	67	1.2	DEL	itsn1_1
Itsn1_1	31	68	1.2	DEL	itsn1_1
Itsn1_1	31	69	1.2	HET	itsn1_1
Itsn1_1	31	70	1.2	HET	itsn1_1
Itsn1_1	31	71	1.2	HET	itsn1_1
Itsn1_1	31	72	1.3	DEL	itsn1_1
Itsn1_1	31	73	1.2	DEL	itsn1_1
Itsn1_1	31	74	1.2	DEL	itsn1_1
Itsn1_1	31	75	1.3	DEL	itsn1_1
Itsn1_1	31	76	1.3	DEL	itsn1_1
Itsn1_1	31	77	1.2	DEL	itsn1_1
Itsn1_1	31	78	1.2	DEL	itsn1_1
Itsn1_1	31	79	1.2	DEL	itsn1_1
Itsn1_1	31	80	1.2	DEL	itsn1_1
Itsn1_1	31	81	1.2	HET	itsn1_1
Itsn1_1	31	82	1.2	DEL	itsn1_1
Itsn1_1	31	83	1.2	DEL	itsn1_1
Itsn1_1	31	84	1.2	DEL	itsn1_1
Itsn1_1	31	85	1.1	DEL	itsn1_1
Itsn1_1	31	86	1.2	DEL	itsn1_1
Itsn1_1	31	87	1.2	HET	itsn1_1
Itsn1_1	31	88	1.2	HET	itsn1_1
Itsn1_1	31	89	1.2	HET	itsn1_1
Itsn1_1	31	90	1.2	HET	itsn1_1
Itsn1_1	31	91	1.2	DEL	itsn1_1
Itsn1_1	31	92	1.2	DEL	itsn1_1
Itsn1_1	31	93	1.1	HET	itsn1_1
Itsn1_1	31	94	1.1	DEL	itsn1_1
Itsn1_1	31	95	1.3	HET	itsn1_1
Itsn1_1	31	96	1.3	HET	itsn1_1
Itsn1_3	30	1	1.3	HET	itsn1_3
Itsn1_3	30	2	1.4	HET	itsn1_3
Itsn1_3	30	3	1.2	HET	itsn1_3
Itsn1_3	30	4	1.2	DEL	itsn1_3
Itsn1_3	30	5	1.3	DEL	itsn1_3
Itsn1_3	30	6	1.3	DEL	itsn1_3
Itsn1_3	30	7	1.25	HET	itsn1_3
Itsn1_3	30	8	1.3	DEL	itsn1_3
Itsn1_3	30	9	1.2	DEL	itsn1_3
Itsn1_3	30	10	1.2	HET	itsn1_3
Itsn1_3	30	11	1.2	DEL	itsn1_3
Itsn1_3	30	12	1.2	DEL	itsn1_3
Itsn1_3	30	13	1.2	HET	itsn1_3
Itsn1_3	30	14	1.1	HET	itsn1_3
Itsn1_3	30	15	1.2	HET	itsn1_3
Itsn1_3	30	16	1.1	DEL	itsn1_3
Itsn1_3	30	17	1.3	DEL	itsn1_3
Itsn1_3	30	18	1.2	DEL	itsn1_3
Itsn1_3	30	19	1.1	HET	itsn1_3
Itsn1_3	30	20	1.1	HET	itsn1_3
Itsn1_3	30	21	1.1	DEL	itsn1_3
Itsn1_3	30	22	1.1	HET	itsn1_3
Itsn1_3	30	23	1.1	HET	itsn1_3
Itsn1_3	30	24	1.1	DEL	itsn1_3
Itsn1_3	30	25	1	HET	itsn1_3
Itsn1_3	30	26	1	HET	itsn1_3
Itsn1_3	30	27	1	HET	itsn1_3
Itsn1_3	30	28	1	HET	itsn1_3
Itsn1_3	30	29	1.2	HET	itsn1_3
Itsn1_3	30	30	1.3	DEL	itsn1_3
Itsn1_3	30	31	1.3	HET	itsn1_3
Itsn1_3	30	32	1.3	HET	itsn1_3
Itsn1_3	30	33	1.2	HET	itsn1_3
Itsn1_3	30	34	1.25	HET	itsn1_3
Itsn1_3	30	35	1.2	HET	itsn1_3
Itsn1_3	30	36	1.2	DEL	itsn1_3
Itsn1_3	30	37	1.2	HET	itsn1_3
Itsn1_3	30	38	1.2	DEL	itsn1_3
Itsn1_3	30	39	1.2	DEL	itsn1_3
Itsn1_3	30	40	1.3	DEL	itsn1_3
Itsn1_3	30	41	1.2	HET	itsn1_3
Itsn1_3	30	42	1.2	DEL	itsn1_3
Itsn1_3	30	43	1.2	DEL	itsn1_3
Itsn1_3	30	44	1.2	DEL	itsn1_3
Itsn1_3	30	45	1.1	HET	itsn1_3
Itsn1_3	30	46	1.2	HET	itsn1_3
Itsn1_3	30	47	1.2	HET	itsn1_3
Itsn1_3	30	48	1.2	HET	itsn1_3
Itsn1_3	31	49	1.1	HET	itsn1_3
Itsn1_3	31	50	1.2	DEL	itsn1_3
Itsn1_3	31	51	1.2	DEL	itsn1_3
Itsn1_3	31	52	1.2	DEL	itsn1_3
Itsn1_3	31	53	1.1	DEL	itsn1_3
Itsn1_3	31	54	1.1	HET	itsn1_3
Itsn1_3	31	55	1	DEL	itsn1_3
Itsn1_3	31	56	1.1	HET	itsn1_3
Itsn1_3	31	57	1.2	HET	itsn1_3
Itsn1_3	31	58	1.2	DEL	itsn1_3
Itsn1_3	31	59	1	DEL	itsn1_3
Itsn1_3	31	60	1	DEL	itsn1_3
Itsn1_3	31	61	1.2	HET	itsn1_3
Itsn1_3	31	62	1.2	HET	itsn1_3
Itsn1_3	31	63	1	DEL	itsn1_3
Itsn1_3	31	64	1	DEL	itsn1_3
Itsn1_3	31	65	1.2	DEL	itsn1_3
Itsn1_3	31	66	1.2	DEL	itsn1_3
Itsn1_3	31	67	1	HET	itsn1_3
Itsn1_3	31	68	1.1	HET	itsn1_3
Itsn1_3	31	69	0.8	DEL	itsn1_3
Itsn1_3	31	70	1	HET	itsn1_3
Itsn1_3	31	71	1	HET	itsn1_3
Itsn1_3	31	72	1	HET	itsn1_3
Itsn1_3	31	73	1.1	DEL	itsn1_3
Itsn1_3	31	74	1.1	HET	itsn1_3
Itsn1_3	31	75	1	HET	itsn1_3
Itsn1_3	31	76	1	DEL	itsn1_3
kif1b_1	30	1	1.3	HET	kif1b_1
kif1b_1	30	2	1.2	DEL	kif1b_1
kif1b_1	30	3	1	HET	kif1b_1
kif1b_1	30	4	1	DEL	kif1b_1
kif1b_1	30	5	1.1	DEL	kif1b_1
kif1b_1	30	6	1.2	DEL	kif1b_1
kif1b_1	30	7	1.2	DEL	kif1b_1
kif1b_1	30	8	1.2	HET	kif1b_1
kif1b_1	30	9	1.2	HET	kif1b_1
kif1b_1	30	10	1.2	HET	kif1b_1
kif1b_1	30	11	1.1	DEL	kif1b_1
kif1b_1	30	12	1.1	HET	kif1b_1
kif1b_1	30	13	1.1	DEL	kif1b_1
kif1b_1	30	14	1.1	HET	kif1b_1
kif1b_1	30	15	1.1	HET	kif1b_1
kif1b_1	30	16	1.1	HET	kif1b_1
kif1b_1	30	17	1	HET	kif1b_1
kif1b_1	30	18	1	HET	kif1b_1
kif1b_1	30	19	1.1	DEL	kif1b_1
kif1b_1	30	20	1.1	DEL	kif1b_1
kif1b_1	30	21	1.1	DEL	kif1b_1
kif1b_1	30	22	1.1	DEL	kif1b_1
kif1b_1	30	23	1.1	HET	kif1b_1
kif1b_1	30	24	1.1	HET	kif1b_1
kif1b_1	30	25	1	DEL	kif1b_1
kif1b_1	30	26	1.1	HET	kif1b_1
kif1b_1	30	27	1.1	DEL	kif1b_1
kif1b_1	30	28	1.1	DEL	kif1b_1
kif1b_1	30	29	1.1	DEL	kif1b_1
kif1b_1	30	30	1.1	HET	kif1b_1
kif1b_1	30	31	1	DEL	kif1b_1
kif1b_1	30	32	1	DEL	kif1b_1
kif1b_1	30	33	1	DEL	kif1b_1
kif1b_1	30	34	1	DEL	kif1b_1
kif1b_1	30	35	1	HET	kif1b_1
kif1b_1	30	36	1	DEL	kif1b_1
kif1b_1	30	37	1.1	HET	kif1b_1
kif1b_1	30	38	1	DEL	kif1b_1
kif1b_1	30	39	1	HET	kif1b_1
kif1b_1	30	40	1.1	DEL	kif1b_1
kif1b_1	30	41	1	DEL	kif1b_1
kif1b_1	30	42	1	HET	kif1b_1
kif1b_1	30	43	1	HET	kif1b_1
kif1b_1	30	44	1	DEL	kif1b_1
kif1b_1	30	45	1	DEL	kif1b_1
kif1b_1	30	46	1	DEL	kif1b_1
kif1b_1	30	47	1	DEL	kif1b_1
kif1b_1	30	48	0.8	DEL	kif1b_1
kif1b_1	31	49	1.1	DEL	kif1b_1
kif1b_1	31	50	1.1	DEL	kif1b_1
kif1b_1	31	51	1	HET	kif1b_1
kif1b_1	31	52	1	HET	kif1b_1
kif1b_1	31	53	1.1	DEL	kif1b_1
kif1b_1	31	54	1	HET	kif1b_1
kif1b_1	31	55	1	HET	kif1b_1
kif1b_1	31	56	1	HET	kif1b_1
kif1b_1	31	57	0.9	DEL	kif1b_1
kif1b_1	31	58	1	DEL	kif1b_1
kif1b_1	31	59	1	DEL	kif1b_1
kif1b_1	31	60	0.9	DEL	kif1b_1
kif1b_1	31	61	1	DEL	kif1b_1
kif1b_1	31	62	1	DEL	kif1b_1
kif1b_1	31	63	1	DEL	kif1b_1
kif1b_1	31	64	1	DEL	kif1b_1
kif1b_1	31	65	1	DEL	kif1b_1
kif1b_1	31	66	1	DEL	kif1b_1
kif1b_1	31	67	1	DEL	kif1b_1
kif1b_1	31	68	0.9	HET	kif1b_1
madd_1	30	1	1.3	HET	madd_1
madd_1	30	2	1.3	DEL	madd_1
madd_1	30	3	1.3	HET	madd_1
madd_1	30	4	1.3	DEL	madd_1
madd_1	30	5	1.2	HET	madd_1
madd_1	30	6	1.2	HET	madd_1
madd_1	30	7	1.3	HET	madd_1
madd_1	30	8	1.3	DEL	madd_1
madd_1	30	9	1.2	DEL	madd_1
madd_1	30	10	1.3	HET	madd_1
madd_1	30	11	1.2	DEL	madd_1
madd_1	30	12	1.2	DEL	madd_1
madd_1	30	13	1.2	HET	madd_1
madd_1	30	14	1.2	DEL	madd_1
madd_1	30	15	1.2	DEL	madd_1
madd_1	30	16	1.2	HET	madd_1
madd_1	30	17	1.3	HET	madd_1
madd_1	30	18	1.3	DEL	madd_1
madd_1	30	19	1.2	DEL	madd_1
madd_1	30	20	1.2	HET	madd_1
madd_1	30	21	0.9	HET	madd_1
madd_1	30	22	0.9	DEL	madd_1
madd_1	30	23	1.2	DEL	madd_1
madd_1	30	24	1.3	DEL	madd_1
madd_1	30	25	1.4	HET	madd_1
madd_1	30	26	1.4	HET	madd_1
madd_1	30	27	1.2	HET	madd_1
madd_1	30	28	1.2	HET	madd_1
madd_1	30	29	1.1	HET	madd_1
madd_1	30	30	1.1	HET	madd_1
madd_1	30	31	1.1	HET	madd_1
madd_1	30	32	1.1	DEL	madd_1
madd_1	30	33	1.2	HET	madd_1
madd_1	30	34	1.2	DEL	madd_1
madd_1	30	35	1.1	HET	madd_1
madd_1	30	36	1.1	DEL	madd_1
madd_1	30	37	1	DEL	madd_1
madd_1	30	38	1	HET	madd_1
madd_1	30	39	1	DEL	madd_1
madd_1	30	40	1	HET	madd_1
madd_1	30	41	0.9	DEL	madd_1
madd_1	30	42	0.9	HET	madd_1
madd_1	30	43	0.8	DEL	madd_1
madd_1	30	44	0.9	DEL	madd_1
madd_1	30	45	0.9	HET	madd_1
madd_1	30	46	1	HET	madd_1
madd_1	30	47	0.9	DEL	madd_1
madd_1	30	48	0.9	DEL	madd_1
mef2ca_2	30	1	1.3	DEL	mef2ca_2
mef2ca_2	30	2	1.2	HET	mef2ca_2
mef2ca_2	30	3	1.3	DEL	mef2ca_2
mef2ca_2	30	4	1.3	HET	mef2ca_2
mef2ca_2	30	5	1.4	DEL	mef2ca_2
mef2ca_2	30	6	1.3	DEL	mef2ca_2
mef2ca_2	30	7	1.2	HET	mef2ca_2
mef2ca_2	30	8	1.2	DEL	mef2ca_2
mef2ca_2	30	9	1.4	HET	mef2ca_2
mef2ca_2	30	10	1.3	HET	mef2ca_2
mef2ca_2	30	11	1.25	HET	mef2ca_2
mef2ca_2	30	12	1.3	HET	mef2ca_2
mef2ca_2	30	13	1.3	HET	mef2ca_2
mef2ca_2	30	14	1.3	HET	mef2ca_2
mef2ca_2	30	15	1.3	DEL	mef2ca_2
mef2ca_2	30	16	1.2	HET	mef2ca_2
mef2ca_2	30	17	1.3	HET	mef2ca_2
mef2ca_2	30	18	1.3	DEL	mef2ca_2
mef2ca_2	30	19	1.3	DEL	mef2ca_2
mef2ca_2	30	20	1.3	HET	mef2ca_2
mef2ca_2	30	21	1.3	DEL	mef2ca_2
mef2ca_2	30	22	1.2	DEL	mef2ca_2
mef2ca_2	30	23	1.2	HET	mef2ca_2
mef2ca_2	30	24	1.2	HET	mef2ca_2
mef2ca_2	30	25	1.3	HET	mef2ca_2
mef2ca_2	30	26	1.2	DEL	mef2ca_2
mef2ca_2	30	27	1.3	DEL	mef2ca_2
mef2ca_2	30	28	1.3	HET	mef2ca_2
mef2ca_2	30	29	1.1	DEL	mef2ca_2
mef2ca_2	30	30	1.2	DEL	mef2ca_2
mef2ca_2	30	31	1.2	HET	mef2ca_2
mef2ca_2	30	32	1.2	HET	mef2ca_2
mef2ca_2	30	33	1.3	HET	mef2ca_2
mef2ca_2	30	34	1.2	DEL	mef2ca_2
mef2ca_2	30	35	1.2	HET	mef2ca_2
mef2ca_2	30	36	1.2	DEL	mef2ca_2
mef2ca_2	30	37	1.2	HET	mef2ca_2
mef2ca_2	30	38	1.2	HET	mef2ca_2
mef2ca_2	30	39	1.1	DEL	mef2ca_2
mef2ca_2	30	40	1.2	HET	mef2ca_2
mef2ca_2	30	41	1.1	HET	mef2ca_2
mef2ca_2	30	42	1.2	DEL	mef2ca_2
mef2ca_2	30	43	1.1	HET	mef2ca_2
mef2ca_2	30	44	1.1	HET	mef2ca_2
mef2ca_2	30	45	1.1	HET	mef2ca_2
mef2ca_2	30	46	1.2	DEL	mef2ca_2
mef2ca_2	30	47	1.1	HET	mef2ca_2
mef2ca_2	30	48	1.1	HET	mef2ca_2
mef2ca_2	31	49	1.1	HET	mef2ca_2
mef2ca_2	31	50	1.2	DEL	mef2ca_2
mef2ca_2	31	51	1.1	DEL	mef2ca_2
mef2ca_2	31	52	1.1	HET	mef2ca_2
mef2ca_2	31	53	1.2	DEL	mef2ca_2
mef2ca_2	31	54	1.2	DEL	mef2ca_2
mef2ca_2	31	55	1.2	HET	mef2ca_2
mef2ca_2	31	56	1.3	DEL	mef2ca_2
mef2ca_2	31	57	1.2	DEL	mef2ca_2
mef2ca_2	31	58	1.2	HET	mef2ca_2
mef2ca_2	31	59	1.2	HET	mef2ca_2
mef2ca_2	31	60	1.2	HET	mef2ca_2
mef2ca_2	31	61	1.1	DEL	mef2ca_2
mef2ca_2	31	62	1.1	DEL	mef2ca_2
mef2ca_2	31	63	1.1	DEL	mef2ca_2
mef2ca_2	31	64	1.1	DEL	mef2ca_2
mef2ca_2	31	65	1.1	DEL	mef2ca_2
mef2ca_2	31	66	1	HET	mef2ca_2
mef2ca_2	31	67	1.2	HET	mef2ca_2
mef2ca_2	31	68	1.2	HET	mef2ca_2
mef2ca_2	31	69	1.1	HET	mef2ca_2
mef2ca_2	31	70	1.1	HET	mef2ca_2
mef2ca_2	31	71	1	DEL	mef2ca_2
mef2ca_2	31	72	1.1	HET	mef2ca_2
mef2ca_2	31	73	1.1	DEL	mef2ca_2
mef2ca_2	31	74	1.1	HET	mef2ca_2
mef2ca_2	31	75	1	HET	mef2ca_2
mef2ca_2	31	76	1	HET	mef2ca_2
mef2ca_2	31	77	1	HET	mef2ca_2
mef2ca_2	31	78	1	HET	mef2ca_2
mef2ca_2	31	79	1	HET	mef2ca_2
mef2ca_2	31	80	1	HET	mef2ca_2
mef2ca_2	31	81	0.7	DEL	mef2ca_2
mef2ca_2	31	82	0.7	HET	mef2ca_2
mef2ca_2	31	83	0.9	HET	mef2ca_2
mef2ca_2	31	84	0.8	HET	mef2ca_2
reln_2_1	30	1	1.4	HET	reln_2
reln_2_1	30	2	1.2	DEL	reln_2
reln_2_1	30	3	1.4	HET	reln_2
reln_2_1	30	4	1.4	HET	reln_2
reln_2_1	30	5	1.4	DEL	reln_2
reln_2_1	30	6	1.4	HET	reln_2
reln_2_1	30	7	1.3	DEL	reln_2
reln_2_1	30	8	1.4	HET	reln_2
reln_2_1	30	9	1.3	DEL	reln_2
reln_2_1	30	10	1.2	HET	reln_2
reln_2_1	30	11	1.2	DEL	reln_2
reln_2_1	30	12	1.3	HET	reln_2
reln_2_1	30	13	1.4	HET	reln_2
reln_2_1	30	14	1.4	DEL	reln_2
reln_2_1	30	15	1.3	HET	reln_2
reln_2_1	30	16	1.2	DEL	reln_2
reln_2_1	30	17	1.3	DEL	reln_2
reln_2_1	30	18	1.3	DEL	reln_2
reln_2_1	30	19	1.2	HET	reln_2
reln_2_1	30	20	1.3	HET	reln_2
reln_2_1	30	21	1.3	HET	reln_2
reln_2_1	30	22	1.2	HET	reln_2
reln_2_1	30	23	1.3	DEL	reln_2
reln_2_1	30	24	1.3	DEL	reln_2
reln_2_1	30	25	1.2	DEL	reln_2
reln_2_1	30	26	1.1	DEL	reln_2
reln_2_1	30	27	1.2	HET	reln_2
reln_2_1	30	28	1.3	HET	reln_2
reln_2_1	30	29	1.2	HET	reln_2
reln_2_1	30	30	1.2	HET	reln_2
reln_2_1	30	31	1.3	DEL	reln_2
reln_2_1	30	32	1.2	DEL	reln_2
reln_2_1	30	33	1.1	HET	reln_2
reln_2_1	30	34	1	HET	reln_2
reln_2_1	30	35	1.2	HET	reln_2
reln_2_1	30	36	1.2	HET	reln_2
reln_2_1	30	37	1.1	HET	reln_2
reln_2_1	30	38	1.1	HET	reln_2
reln_2_1	30	39	1.1	DEL	reln_2
reln_2_1	30	40	1	HET	reln_2
reln_2_1	30	41	1.2	NA	reln_2
reln_2_1	30	42	1.2	NA	reln_2
reln_2_1	30	43	1.2	DEL	reln_2
reln_2_1	30	44	1.2	DEL	reln_2
reln_2_1	30	45	1.2	HET	reln_2
reln_2_1	30	46	1.2	DEL	reln_2
reln_2_1	30	47	1.2	DEL	reln_2
reln_2_1	30	48	1.3	NA	reln_2
reln_2_1	31	49	1.1	HET	reln_2
reln_2_1	31	50	1.1	DEL	reln_2
reln_2_1	31	51	1.3	HET	reln_2
reln_2_1	31	52	1.2	DEL	reln_2
reln_2_1	31	53	1.1	HET	reln_2
reln_2_1	31	54	1	DEL	reln_2
reln_2_1	31	55	1.1	DEL	reln_2
reln_2_1	31	56	1.1	DEL	reln_2
reln_2_1	31	57	1.1	HET	reln_2
reln_2_1	31	58	1.1	DEL	reln_2
reln_2_1	31	59	1	HET	reln_2
reln_2_1	31	60	1.1	DEL	reln_2
reln_2_1	31	61	0.9	DEL	reln_2
reln_2_1	31	62	1.1	DEL	reln_2
reln_2_1	31	63	0.9	HET	reln_2
reln_2_1	31	64	0.8	DEL	reln_2
reln_2_2	31	1	1.4	HET	reln_2
reln_2_2	31	2	1.4	HET	reln_2
reln_2_2	31	3	1.3	DEL	reln_2
reln_2_2	31	4	1.3	HET	reln_2
reln_2_2	31	5	1.4	HET	reln_2
reln_2_2	31	6	1.4	DEL	reln_2
reln_2_2	31	7	1.4	HET	reln_2
reln_2_2	31	8	1.4	HET	reln_2
reln_2_2	31	9	1.2	DEL	reln_2
reln_2_2	31	10	1.3	DEL	reln_2
reln_2_2	31	11	1.3	DEL	reln_2
reln_2_2	31	12	1.3	HET	reln_2
reln_2_2	31	13	1.3	HET	reln_2
reln_2_2	31	14	1.4	DEL	reln_2
reln_2_2	31	15	1.3	HET	reln_2
reln_2_2	31	16	1.3	DEL	reln_2
reln_2_2	31	17	1.3	DEL	reln_2
reln_2_2	31	18	1.2	HET	reln_2
reln_2_2	31	19	1.4	DEL	reln_2
reln_2_2	31	20	1.3	DEL	reln_2
reln_2_2	31	21	1.3	HET	reln_2
reln_2_2	31	22	1.3	HET	reln_2
reln_2_2	31	23	1.2	DEL	reln_2
reln_2_2	31	24	1.2	DEL	reln_2
reln_2_2	31	25	1.2	DEL	reln_2
reln_2_2	31	26	1.2	HET	reln_2
reln_2_2	31	27	1.1	HET	reln_2
reln_2_2	31	28	1.1	HET	reln_2
reln_2_2	31	29	1.1	HET	reln_2
reln_2_2	31	30	1.1	DEL	reln_2
reln_2_2	31	31	1.2	HET	reln_2
reln_2_2	31	32	1.2	DEL	reln_2
reln_2_2	31	33	1.2	DEL	reln_2
reln_2_2	31	34	1.2	DEL	reln_2
reln_2_2	31	35	1.2	HET	reln_2
reln_2_2	31	36	1.2	DEL	reln_2
reln_2_2	31	37	1.2	DEL	reln_2
reln_2_2	31	38	1.1	HET	reln_2
reln_2_2	31	39	1.2	HET	reln_2
reln_2_2	31	40	1.2	HET	reln_2
reln_2_2	31	41	1.3	HET	reln_2
reln_2_2	31	42	1.2	DEL	reln_2
reln_2_2	31	43	1.2	HET	reln_2
reln_2_2	31	44	1.1	HET	reln_2
reln_2_2	31	45	1.1	DEL	reln_2
reln_2_2	31	46	1.1	DEL	reln_2
reln_2_2	31	47	1.1	HET	reln_2
reln_2_2	31	48	1.1	DEL	reln_2
reln_2_2	32	49	1.3	HET	reln_2
reln_2_2	32	50	1.2	DEL	reln_2
reln_2_2	32	51	1.25	DEL	reln_2
reln_2_2	32	52	1.2	HET	reln_2
reln_2_2	32	53	1.3	HET	reln_2
reln_2_2	32	54	1.2	DEL	reln_2
reln_2_2	32	55	1.3	HET	reln_2
reln_2_2	32	56	1.4	DEL	reln_2
reln_2_2	32	57	1.2	DEL	reln_2
reln_2_2	32	58	1.3	HET	reln_2
reln_2_2	32	59	1.2	HET	reln_2
reln_2_2	32	60	1.3	DEL	reln_2
reln_2_2	32	61	1.4	DEL	reln_2
reln_2_2	32	62	1.3	DEL	reln_2
reln_2_2	32	63	1	DEL	reln_2
reln_2_2	32	64	1.1	DEL	reln_2
reln_2_2	32	65	1.1	HET	reln_2
reln_2_2	32	66	1.2	HET	reln_2
reln_2_2	32	67	1.3	DEL	reln_2
reln_2_2	32	68	1.2	DEL	reln_2
reln_2_2	32	69	1.1	DEL	reln_2
reln_2_2	32	70	1.1	DEL	reln_2
reln_2_2	32	71	1.2	HET	reln_2
reln_2_2	32	72	1.1	HET	reln_2
reln_2_2	32	73	1.3	DEL	reln_2
reln_2_2	32	74	1.2	DEL	reln_2
reln_2_2	32	75	1.1	DEL	reln_2
reln_2_2	32	76	1	HET	reln_2
reln_2_2	32	77	1.2	DEL	reln_2
reln_2_2	32	78	1.1	HET	reln_2
reln_2_2	32	79	1.1	HET	reln_2
reln_2_2	32	80	1.1	DEL	reln_2
reln_2_2	32	81	1.2	DEL	reln_2
reln_2_2	32	82	1.1	DEL	reln_2
reln_2_2	32	83	1.1	HET	reln_2
reln_2_2	32	84	1.1	DEL	reln_2
reln_2_2	32	85	1	HET	reln_2
reln_2_2	32	86	1	HET	reln_2
reln_2_2	32	87	0.9	DEL	reln_2
reln_2_2	32	88	0.9	HET	reln_2
reln_2_2	32	89	1.1	HET	reln_2
reln_2_2	32	90	1.1	HET	reln_2
reln_2_2	32	91	1	HET	reln_2
reln_2_2	32	92	1	HET	reln_2
reln_2_2	32	93	1.1	HET	reln_2
reln_2_2	32	94	1	HET	reln_2
reln_2_2	32	95	1	HET	reln_2
reln_2_2	32	96	1	HET	reln_2
Shank3a_2_1	30	1	1.2	DEL	shank3a_2
Shank3a_2_1	30	2	1.1	DEL	shank3a_2
Shank3a_2_1	30	3	1.2	HET	shank3a_2
Shank3a_2_1	30	4	1.2	DEL	shank3a_2
Shank3a_2_1	30	5	1.2	DEL	shank3a_2
Shank3a_2_1	30	6	1.2	HET	shank3a_2
Shank3a_2_1	30	7	1.3	HET	shank3a_2
Shank3a_2_1	30	8	1.3	HET	shank3a_2
Shank3a_2_1	30	9	1.2	HET	shank3a_2
Shank3a_2_1	30	10	1.2	DEL	shank3a_2
Shank3a_2_1	30	11	1.2	HET	shank3a_2
Shank3a_2_1	30	12	1.1	DEL	shank3a_2
Shank3a_2_1	30	13	1.3	DEL	shank3a_2
Shank3a_2_1	30	14	1.2	HET	shank3a_2
Shank3a_2_1	30	15	1.2	DEL	shank3a_2
Shank3a_2_1	30	16	1.2	HET	shank3a_2
Shank3a_2_1	30	17	1.3	DEL	shank3a_2
Shank3a_2_1	30	18	1.2	DEL	shank3a_2
Shank3a_2_1	30	19	1.1	HET	shank3a_2
Shank3a_2_1	30	20	1.2	HET	shank3a_2
Shank3a_2_1	30	21	1.2	DEL	shank3a_2
Shank3a_2_1	30	22	1.2	HET	shank3a_2
Shank3a_2_1	30	23	1.3	HET	shank3a_2
Shank3a_2_1	30	24	1.2	DEL	shank3a_2
Shank3a_2_1	30	25	1.3	DEL	shank3a_2
Shank3a_2_1	30	26	1.3	HET	shank3a_2
Shank3a_2_1	30	27	1.2	HET	shank3a_2
Shank3a_2_1	30	28	1.2	DEL	shank3a_2
Shank3a_2_1	30	29	1.3	DEL	shank3a_2
Shank3a_2_1	30	30	1.3	HET	shank3a_2
Shank3a_2_1	30	31	1.2	DEL	shank3a_2
Shank3a_2_1	30	32	1.2	HET	shank3a_2
Shank3a_2_1	30	33	1.1	HET	shank3a_2
Shank3a_2_1	30	34	1.2	HET	shank3a_2
Shank3a_2_1	30	35	1.2	DEL	shank3a_2
Shank3a_2_1	30	36	1.2	HET	shank3a_2
Shank3a_2_1	30	37	1.2	DEL	shank3a_2
Shank3a_2_1	30	38	1.2	HET	shank3a_2
Shank3a_2_1	30	39	1.1	DEL	shank3a_2
Shank3a_2_1	30	40	1.1	DEL	shank3a_2
Shank3a_2_1	30	41	1.1	DEL	shank3a_2
Shank3a_2_1	30	42	1.1	DEL	shank3a_2
Shank3a_2_1	30	43	1.1	HET	shank3a_2
Shank3a_2_1	30	44	1	DEL	shank3a_2
Shank3a_2_1	30	45	1.1	HET	shank3a_2
Shank3a_2_1	30	46	1.1	HET	shank3a_2
Shank3a_2_1	30	47	1.1	HET	shank3a_2
Shank3a_2_1	30	48	1	DEL	shank3a_2
Shank3a_2_1	30	49	1.1	DEL	shank3a_2
Shank3a_2_1	30	50	1.1	DEL	shank3a_2
Shank3a_2_1	30	51	1	DEL	shank3a_2
Shank3a_2_1	30	52	1	DEL	shank3a_2
Shank3a_2_1	30	53	1	DEL	shank3a_2
Shank3a_2_1	30	54	1	DEL	shank3a_2
Shank3a_2_1	30	55	1	DEL	shank3a_2
Shank3a_2_1	30	56	1	DEL	shank3a_2
Shank3a_2_1	31	57	1.4	DEL	shank3a_2
Shank3a_2_1	31	58	1.3	HET	shank3a_2
Shank3a_2_1	31	59	1.3	DEL	shank3a_2
Shank3a_2_1	31	60	1.3	DEL	shank3a_2
Shank3a_2_1	31	61	1.2	DEL	shank3a_2
Shank3a_2_1	31	62	1.3	DEL	shank3a_2
Shank3a_2_1	31	63	1.3	HET	shank3a_2
Shank3a_2_1	31	64	1.2	DEL	shank3a_2
Shank3a_2_1	31	65	1.1	DEL	shank3a_2
Shank3a_2_1	31	66	1.1	DEL	shank3a_2
Shank3a_2_1	31	67	1.1	DEL	shank3a_2
Shank3a_2_1	31	68	1.2	HET	shank3a_2
Shank3a_2_1	31	69	1.2	HET	shank3a_2
Shank3a_2_1	31	70	1	DEL	shank3a_2
Shank3a_2_1	31	71	1	HET	shank3a_2
Shank3a_2_1	31	72	1	DEL	shank3a_2
Shank3a_2_1	31	73	1.1	DEL	shank3a_2
Shank3a_2_1	31	74	1.1	DEL	shank3a_2
Shank3a_2_1	31	75	1	HET	shank3a_2
Shank3a_2_1	31	76	1	DEL	shank3a_2
Shank3a_2_1	31	77	1	DEL	shank3a_2
Shank3a_2_1	31	78	1	DEL	shank3a_2
Shank3a_2_1	31	79	1	DEL	shank3a_2
Shank3a_2_1	31	80	1	HET	shank3a_2
shank3a_2_2	31	1	1.4	HET	shank3a_2
shank3a_2_2	31	2	1.4	DEL	shank3a_2
shank3a_2_2	31	3	1.4	DEL	shank3a_2
shank3a_2_2	31	4	1.4	HET	shank3a_2
shank3a_2_2	31	5	1.5	DEL	shank3a_2
shank3a_2_2	31	6	1.3	DEL	shank3a_2
shank3a_2_2	31	7	1.4	HET	shank3a_2
shank3a_2_2	31	8	1.4	DEL	shank3a_2
shank3a_2_2	31	9	1.3	DEL	shank3a_2
shank3a_2_2	31	10	1.3	DEL	shank3a_2
shank3a_2_2	31	11	1.5	HET	shank3a_2
shank3a_2_2	31	12	1.4	HET	shank3a_2
shank3a_2_2	31	13	1.4	HET	shank3a_2
shank3a_2_2	31	14	1.6	DEL	shank3a_2
shank3a_2_2	31	15	1.5	DEL	shank3a_2
shank3a_2_2	31	16	1.4	HET	shank3a_2
shank3a_2_2	31	17	1.5	HET	shank3a_2
shank3a_2_2	31	18	1.4	HET	shank3a_2
shank3a_2_2	31	19	1.4	DEL	shank3a_2
shank3a_2_2	31	20	1.5	HET	shank3a_2
shank3a_2_2	31	21	1.4	HET	shank3a_2
shank3a_2_2	31	22	1.5	HET	shank3a_2
shank3a_2_2	31	23	1.5	HET	shank3a_2
shank3a_2_2	31	24	1.4	DEL	shank3a_2
shank3a_2_2	31	25	1.7	DEL	shank3a_2
shank3a_2_2	31	26	1.6	HET	shank3a_2
shank3a_2_2	31	27	1.4	HET	shank3a_2
shank3a_2_2	31	28	1.3	DEL	shank3a_2
shank3a_2_2	31	29	1.3	HET	shank3a_2
shank3a_2_2	31	30	1.3	HET	shank3a_2
shank3a_2_2	31	31	1.3	DEL	shank3a_2
shank3a_2_2	31	32	1.3	HET	shank3a_2
shank3a_2_2	31	33	1.5	HET	shank3a_2
shank3a_2_2	31	34	1.4	HET	shank3a_2
shank3a_2_2	31	35	1.3	DEL	shank3a_2
shank3a_2_2	31	36	1.3	HET	shank3a_2
shank3a_2_2	31	37	1.3	HET	shank3a_2
shank3a_2_2	31	38	1.25	HET	shank3a_2
shank3a_2_2	31	39	1.4	HET	shank3a_2
shank3a_2_2	31	40	1.4	HET	shank3a_2
shank3a_2_2	31	41	1.4	DEL	shank3a_2
shank3a_2_2	31	42	1.4	DEL	shank3a_2
shank3a_2_2	31	43	1.2	HET	shank3a_2
shank3a_2_2	31	44	1.2	DEL	shank3a_2
shank3a_2_2	31	45	1.2	HET	shank3a_2
shank3a_2_2	31	46	1.2	DEL	shank3a_2
shank3a_2_2	31	47	1.2	DEL	shank3a_2
shank3a_2_2	31	48	1.2	DEL	shank3a_2
shank3a_2_2	32	49	1.3	HET	shank3a_2
shank3a_2_2	32	50	1.4	DEL	shank3a_2
shank3a_2_2	32	51	1.5	HET	shank3a_2
shank3a_2_2	32	52	1.4	DEL	shank3a_2
shank3a_2_2	32	53	1.5	HET	shank3a_2
shank3a_2_2	32	54	1.5	DEL	shank3a_2
shank3a_2_2	32	55	1.2	DEL	shank3a_2
shank3a_2_2	32	56	1.4	HET	shank3a_2
shank3a_2_2	32	57	1.4	DEL	shank3a_2
shank3a_2_2	32	58	1.4	HET	shank3a_2
shank3a_2_2	32	59	1.3	HET	shank3a_2
shank3a_2_2	32	60	1.4	DEL	shank3a_2
shank3a_2_2	32	61	1.3	HET	shank3a_2
shank3a_2_2	32	62	1.4	DEL	shank3a_2
shank3a_2_2	32	63	1.3	DEL	shank3a_2
shank3a_2_2	32	64	1.4	HET	shank3a_2
shank3a_2_2	32	65	1.6	DEL	shank3a_2
shank3a_2_2	32	66	1.6	HET	shank3a_2
shank3a_2_2	32	67	1.4	HET	shank3a_2
shank3a_2_2	32	68	1.5	HET	shank3a_2
shank3a_2_2	32	69	1.4	DEL	shank3a_2
shank3a_2_2	32	70	1.4	HET	shank3a_2
shank3a_2_2	32	71	1.3	HET	shank3a_2
shank3a_2_2	32	72	1.2	DEL	shank3a_2
shank3a_2_2	32	73	1.3	DEL	shank3a_2
shank3a_2_2	32	74	1.3	DEL	shank3a_2
shank3a_2_2	32	75	1.2	HET	shank3a_2
shank3a_2_2	32	76	1.3	HET	shank3a_2
shank3a_2_2	32	77	1.3	HET	shank3a_2
shank3a_2_2	32	78	1.3	HET	shank3a_2
shank3a_2_2	32	79	1.2	DEL	shank3a_2
shank3a_2_2	32	80	1.2	DEL	shank3a_2
shank3a_2_2	32	81	1.3	HET	shank3a_2
shank3a_2_2	32	82	1.3	HET	shank3a_2
shank3a_2_2	32	83	1.3	DEL	shank3a_2
shank3a_2_2	32	84	1.3	DEL	shank3a_2
shank3a_2_2	32	85	1.2	HET	shank3a_2
shank3a_2_2	32	86	1.3	HET	shank3a_2
shank3a_2_2	32	87	1.2	DEL	shank3a_2
shank3a_2_2	32	88	1.2	DEL	shank3a_2
shank3a_2_2	32	89	1.2	DEL	shank3a_2
shank3a_2_2	32	90	1.2	DEL	shank3a_2
shank3a_2_2	32	91	1.2	HET	shank3a_2
shank3a_2_2	32	92	1.1	HET	shank3a_2
shank3a_2_2	32	93	NA	NA	shank3a_2
shank3a_2_2	32	94	NA	NA	shank3a_2
shank3a_2_2	32	95	1.2	DEL	shank3a_2
shank3a_2_2	32	96	1.2	DEL	shank3a_2
shank3a_2_NA	31	1	1.1	HET	shank3a_2
shank3a_2_NA	31	2	1	HET	shank3a_2
shank3a_2_NA	31	3	1.25	DEL	shank3a_2
shank3a_2_NA	31	4	1.3	HET	shank3a_2
shank3a_2_NA	31	5	1.1	HET	shank3a_2
shank3a_2_NA	31	6	1.2	DEL	shank3a_2
shank3a_2_NA	31	7	1	DEL	shank3a_2
shank3a_2_NA	31	8	1	HET	shank3a_2
shank3a_2_NA	31	9	1	HET	shank3a_2
shank3a_2_NA	31	10	1	HET	shank3a_2
shank3a_2_NA	31	11	1	DEL	shank3a_2
shank3a_2_NA	31	12	1.2	DEL	shank3a_2
shank3a_2_NA	31	13	1	DEL	shank3a_2
shank3a_2_NA	31	14	1	DEL	shank3a_2
shank3a_2_NA	31	15	1	DEL	shank3a_2
shank3a_2_NA	31	16	0.9	DEL	shank3a_2
shank3a_2_NA	31	17	1.1	HET	shank3a_2
shank3a_2_NA	31	18	0.9	HET	shank3a_2
shank3b_1_1	30	1	1.3	HET	shank3b_1
shank3b_1_1	30	2	1.2	HET	shank3b_1
shank3b_1_1	30	3	1.2	DEL	shank3b_1
shank3b_1_1	30	4	1.2	DEL	shank3b_1
shank3b_1_1	30	5	1.2	DEL	shank3b_1
shank3b_1_1	30	6	1.1	DEL	shank3b_1
shank3b_1_1	30	7	1.1	HET	shank3b_1
shank3b_1_1	30	8	1	HET	shank3b_1
shank3b_1_1	30	9	1.1	DEL	shank3b_1
shank3b_1_1	30	10	1.1	HET	shank3b_1
shank3b_1_1	30	11	1.2	HET	shank3b_1
shank3b_1_1	30	12	1.2	HET	shank3b_1
shank3b_1_1	30	13	1.2	DEL	shank3b_1
shank3b_1_1	30	14	1.1	DEL	shank3b_1
shank3b_1_1	30	15	1.3	HET	shank3b_1
shank3b_1_1	30	16	1.3	HET	shank3b_1
shank3b_1_1	30	17	1.3	DEL	shank3b_1
shank3b_1_1	30	18	1.3	DEL	shank3b_1
shank3b_1_1	30	19	1.2	DEL	shank3b_1
shank3b_1_1	30	20	1.2	HET	shank3b_1
shank3b_1_1	30	21	1.2	HET	shank3b_1
shank3b_1_1	30	22	1.3	DEL	shank3b_1
shank3b_1_1	30	23	1.2	DEL	shank3b_1
shank3b_1_1	30	24	1.2	DEL	shank3b_1
shank3b_1_1	30	25	1.3	HET	shank3b_1
shank3b_1_1	30	26	1.2	HET	shank3b_1
shank3b_1_1	30	27	1.3	DEL	shank3b_1
shank3b_1_1	30	28	1.3	HET	shank3b_1
shank3b_1_1	30	29	1.3	HET	shank3b_1
shank3b_1_1	30	30	1.2	DEL	shank3b_1
shank3b_1_1	30	31	1.2	HET	shank3b_1
shank3b_1_1	30	32	1.1	DEL	shank3b_1
shank3b_1_1	30	33	1.4	DEL	shank3b_1
shank3b_1_1	30	34	1.3	HET	shank3b_1
shank3b_1_1	30	35	1.4	HET	shank3b_1
shank3b_1_1	30	36	1.3	DEL	shank3b_1
shank3b_1_1	30	37	1.2	HET	shank3b_1
shank3b_1_1	30	38	1.1	DEL	shank3b_1
shank3b_1_1	30	39	1.1	HET	shank3b_1
shank3b_1_1	30	40	1.2	HET	shank3b_1
shank3b_1_1	30	41	1.2	DEL	shank3b_1
shank3b_1_1	30	42	1.2	HET	shank3b_1
shank3b_1_1	30	43	1.2	DEL	shank3b_1
shank3b_1_1	30	44	1.2	HET	shank3b_1
shank3b_1_1	30	45	1.3	HET	shank3b_1
shank3b_1_1	30	46	1.3	HET	shank3b_1
shank3b_1_1	30	47	1.3	DEL	shank3b_1
shank3b_1_1	30	48	1.2	DEL	shank3b_1
shank3b_1_1	30	49	1.1	HET	shank3b_1
shank3b_1_1	30	50	1.1	HET	shank3b_1
shank3b_1_1	30	51	1.1	HET	shank3b_1
shank3b_1_1	30	52	1.2	HET	shank3b_1
shank3b_1_1	30	53	1.1	HET	shank3b_1
shank3b_1_1	30	54	1.1	HET	shank3b_1
shank3b_1_1	30	55	1.1	HET	shank3b_1
shank3b_1_1	30	56	1.1	HET	shank3b_1
shank3b_1_1	31	57	1.4	HET	shank3b_1
shank3b_1_1	31	58	1.4	HET	shank3b_1
shank3b_1_1	31	59	1.2	HET	shank3b_1
shank3b_1_1	31	60	1.3	DEL	shank3b_1
shank3b_1_1	31	61	1.3	DEL	shank3b_1
shank3b_1_1	31	62	1.3	HET	shank3b_1
shank3b_1_1	31	63	1.2	DEL	shank3b_1
shank3b_1_1	31	64	1.1	DEL	shank3b_1
shank3b_1_1	31	65	1.3	HET	shank3b_1
shank3b_1_1	31	66	1.2	DEL	shank3b_1
shank3b_1_1	31	67	1.2	HET	shank3b_1
shank3b_1_1	31	68	1.2	HET	shank3b_1
shank3b_1_1	31	69	1.2	HET	shank3b_1
shank3b_1_1	31	70	1.1	HET	shank3b_1
shank3b_1_1	31	71	1.3	HET	shank3b_1
shank3b_1_1	31	72	1.2	DEL	shank3b_1
shank3b_1_1	31	73	1.1	HET	shank3b_1
shank3b_1_1	31	74	1.2	HET	shank3b_1
shank3b_1_1	31	75	1.2	HET	shank3b_1
shank3b_1_1	31	76	1.3	HET	shank3b_1
shank3b_1_1	31	77	1.2	DEL	shank3b_1
shank3b_1_1	31	78	1.2	DEL	shank3b_1
shank3b_1_1	31	79	1.2	DEL	shank3b_1
shank3b_1_1	31	80	1.2	HET	shank3b_1
shank3b_1_1	31	81	1.1	DEL	shank3b_1
shank3b_1_1	31	82	1.2	DEL	shank3b_1
shank3b_1_1	31	83	1.2	HET	shank3b_1
shank3b_1_1	31	84	1.2	DEL	shank3b_1
shank3b_1_1	31	85	1.2	DEL	shank3b_1
shank3b_1_1	31	86	1.2	DEL	shank3b_1
shank3b_1_1	31	87	1.1	DEL	shank3b_1
shank3b_1_1	31	88	1.3	HET	shank3b_1
shank3b_1_1	31	89	1.2	DEL	shank3b_1
shank3b_1_1	31	90	1.1	HET	shank3b_1
shank3b_1_1	31	91	1.1	HET	shank3b_1
shank3b_1_1	31	92	1.1	HET	shank3b_1
shank3b_1_1	31	93	1	DEL	shank3b_1
shank3b_1_1	31	94	1.1	HET	shank3b_1
shank3b_1_1	31	95	1.1	HET	shank3b_1
shank3b_1_1	31	96	1	HET	shank3b_1
src_1	31	1	1.4	NA	src_1
src_1	31	2	1.4	DEL	src_1
src_1	31	3	1.4	HET	src_1
src_1	31	4	1.3	HET	src_1
src_1	31	5	1.2	HET	src_1
src_1	31	6	1.3	HET	src_1
src_1	31	7	1.2	HET	src_1
src_1	31	8	1.3	NA	src_1
src_1	31	9	1.3	HET	src_1
src_1	31	10	1.3	HET	src_1
src_1	31	11	1.3	HET	src_1
src_1	31	12	1.2	HET	src_1
src_1	31	13	1.2	HET	src_1
src_1	31	14	1.2	DEL	src_1
src_1	31	15	1.2	DEL	src_1
src_1	31	16	1.2	HET	src_1
src_1	31	17	1.2	HET	src_1
src_1	31	18	1.2	HET	src_1
src_1	31	19	1.3	DEL	src_1
src_1	31	20	1.2	DEL	src_1
src_1	31	21	1.2	NA	src_1
src_1	31	22	1.1	DEL	src_1
src_1	31	23	1.2	DEL	src_1
src_1	31	24	1.1	HET	src_1
src_1	31	25	1	HET	src_1
src_1	31	26	1.1	DEL	src_1
src_1	31	27	1.1	DEL	src_1
src_1	31	28	1.1	DEL	src_1
src_1	31	29	1.2	DEL	src_1
src_1	31	30	1.2	DEL	src_1
src_1	31	31	1.2	HET	src_1
src_1	31	32	1.1	HET	src_1
src_1	31	33	1.2	DEL	src_1
src_1	31	34	1.2	HET	src_1
src_1	31	35	1.1	HET	src_1
src_1	31	36	1.1	DEL	src_1
src_1	31	37	1.1	DEL	src_1
src_1	31	38	1.1	DEL	src_1
src_1	31	39	1.1	HET	src_1
src_1	31	40	1.1	DEL	src_1
src_1	32	41	1.2	HET	src_1
src_1	32	42	1.1	DEL	src_1
src_1	32	43	1.1	DEL	src_1
src_1	32	44	1.1	DEL	src_1
src_1	32	45	1.2	DEL	src_1
src_1	32	46	1.2	DEL	src_1
src_1	32	47	1.1	DEL	src_1
src_1	32	48	1.1	HET	src_1
src_1	32	49	1.1	DEL	src_1
src_1	32	50	1	DEL	src_1
src_1	32	51	1.1	HET	src_1
src_1	32	52	1.1	DEL	src_1
src_1	32	53	1.1	HET	src_1
src_1	32	54	1.1	HET	src_1
src_1	32	55	1.1	DEL	src_1
src_1	32	56	1.1	DEL	src_1
src_1	32	57	1.1	DEL	src_1
src_1	32	58	1.1	DEL	src_1
src_1	32	59	1.1	HET	src_1
src_1	32	60	1.1	HET	src_1
src_1	32	61	1	HET	src_1
src_1	32	62	1.1	DEL	src_1
src_1	32	63	1	HET	src_1
src_1	32	64	1.1	HET	src_1
src_1	32	65	1	NA	src_1
src_1	32	66	1.1	HET	src_1
src_1	32	67	1.1	HET	src_1
src_1	32	68	1.1	HET	src_1
src_1	32	69	1	DEL	src_1
src_1	32	70	1.1	HET	src_1
src_1	32	71	1	HET	src_1
src_1	32	72	1	HET	src_1
src_1	32	73	1.1	HET	src_1
src_1	32	74	1	DEL	src_1
src_1	32	75	0.9	HET	src_1
src_1	32	76	0.9	HET	src_1
src_1	32	77	0.9	DEL	src_1
src_1	32	78	0.9	HET	src_1
src_1	32	79	0.9	DEL	src_1
src_1	32	80	0.9	DEL	src_1
vav2_1_1	30	1	1.1	HET	vav2_1
vav2_1_1	30	2	1.15	DEL	vav2_1
vav2_1_1	30	3	1.2	HET	vav2_1
vav2_1_1	30	4	1.2	HET	vav2_1
vav2_1_1	30	5	1.2	HET	vav2_1
vav2_1_1	30	6	1.2	DEL	vav2_1
vav2_1_1	30	7	1.3	HET	vav2_1
vav2_1_1	30	8	1.3	HET	vav2_1
vav2_1_1	30	9	1.25	DEL	vav2_1
vav2_1_1	30	10	1.3	HET	vav2_1
vav2_1_1	30	11	1.2	DEL	vav2_1
vav2_1_1	30	12	1.2	HET	vav2_1
vav2_1_1	30	13	1.3	HET	vav2_1
vav2_1_1	30	14	1.3	DEL	vav2_1
vav2_1_1	30	15	1.2	DEL	vav2_1
vav2_1_1	30	16	1.25	HET	vav2_1
vav2_1_1	30	17	1.3	DEL	vav2_1
vav2_1_1	30	18	1.2	DEL	vav2_1
vav2_1_1	30	19	1.2	DEL	vav2_1
vav2_1_1	30	20	1.2	HET	vav2_1
vav2_1_1	30	21	1.3	HET	vav2_1
vav2_1_1	30	22	1.2	HET	vav2_1
vav2_1_1	30	23	1.3	DEL	vav2_1
vav2_1_1	30	24	1.3	HET	vav2_1
vav2_1_1	30	25	1.3	HET	vav2_1
vav2_1_1	30	26	1.3	HET	vav2_1
vav2_1_1	30	27	1.3	HET	vav2_1
vav2_1_1	30	28	1.35	DEL	vav2_1
vav2_1_1	30	29	1.3	DEL	vav2_1
vav2_1_1	30	30	1.3	DEL	vav2_1
vav2_1_1	30	31	1.3	DEL	vav2_1
vav2_1_1	30	32	1.25	HET	vav2_1
vav2_1_1	30	33	1.4	DEL	vav2_1
vav2_1_1	30	34	1.4	HET	vav2_1
vav2_1_1	30	35	1.3	HET	vav2_1
vav2_1_1	30	36	1.3	HET	vav2_1
vav2_1_1	31	37	1.35	DEL	vav2_1
vav2_1_1	31	38	1.3	HET	vav2_1
vav2_1_1	31	39	1.35	DEL	vav2_1
vav2_1_1	31	40	1.3	HET	vav2_1
vav2_1_1	31	41	1.3	HET	vav2_1
vav2_1_1	31	42	1.3	HET	vav2_1
vav2_1_1	31	43	1.3	HET	vav2_1
vav2_1_1	31	44	1.35	DEL	vav2_1
vav2_1_1	31	45	1.3	HET	vav2_1
vav2_1_1	31	46	1.3	DEL	vav2_1
vav2_1_1	31	47	1.3	HET	vav2_1
vav2_1_1	31	48	1.3	HET	vav2_1
vav2_1_1	31	49	1.3	DEL	vav2_1
vav2_1_1	31	50	1.4	DEL	vav2_1
vav2_1_1	31	51	1.2	DEL	vav2_1
vav2_1_1	31	52	1.3	DEL	vav2_1
vav2_1_1	31	53	1.35	HET	vav2_1
vav2_1_1	31	54	1.3	HET	vav2_1
vav2_1_1	31	55	1.25	HET	vav2_1
vav2_1_1	31	56	1.3	HET	vav2_1
vav2_1_2	31	1	1.3	DEL	vav2_1
vav2_1_2	31	2	1.2	DEL	vav2_1
vav2_1_2	31	3	1.3	HET	vav2_1
vav2_1_2	31	4	1.3	DEL	vav2_1
vav2_1_2	31	5	1.3	HET	vav2_1
vav2_1_2	31	6	1.3	HET	vav2_1
vav2_1_2	31	7	1.3	HET	vav2_1
vav2_1_2	31	8	1.2	HET	vav2_1
vav2_1_2	31	9	1.2	HET	vav2_1
vav2_1_2	31	10	1.2	DEL	vav2_1
vav2_1_2	31	11	1.2	HET	vav2_1
vav2_1_2	31	12	1.2	DEL	vav2_1
vav2_1_2	31	13	1.4	HET	vav2_1
vav2_1_2	31	14	1.3	DEL	vav2_1
vav2_1_2	31	15	1.2	DEL	vav2_1
vav2_1_2	31	16	1.2	HET	vav2_1
vav2_1_2	31	17	1.4	HET	vav2_1
vav2_1_2	31	18	1.2	DEL	vav2_1
vav2_1_2	31	19	1.3	DEL	vav2_1
vav2_1_2	31	20	1.4	DEL	vav2_1
vav2_1_2	31	21	1.4	DEL	vav2_1
vav2_1_2	31	22	1.3	DEL	vav2_1
vav2_1_2	31	23	1.3	DEL	vav2_1
vav2_1_2	31	24	1.3	HET	vav2_1
vav2_1_2	31	25	1.3	DEL	vav2_1
vav2_1_2	31	26	1.3	HET	vav2_1
vav2_1_2	31	27	1.2	HET	vav2_1
vav2_1_2	31	28	1.4	DEL	vav2_1
vav2_1_2	31	29	1.2	HET	vav2_1
vav2_1_2	31	30	1.2	HET	vav2_1
vav2_1_2	31	31	1.2	HET	vav2_1
vav2_1_2	31	32	1.2	HET	vav2_1
vav2_1_2	31	33	1.2	HET	vav2_1
vav2_1_2	31	34	1.2	HET	vav2_1
vav2_1_2	31	35	1.2	HET	vav2_1
vav2_1_2	31	36	1.2	DEL	vav2_1
vav2_1_2	31	37	1.1	HET	vav2_1
vav2_1_2	31	38	1.1	DEL	vav2_1
vav2_1_2	31	39	1.5	HET	vav2_1
vav2_1_2	31	40	1.4	HET	vav2_1
vav2_1_2	31	41	1.3	DEL	vav2_1
vav2_1_2	31	42	1.3	HET	vav2_1
vav2_1_2	31	43	1.3	DEL	vav2_1
vav2_1_2	31	44	1.4	HET	vav2_1
vav2_1_2	31	45	1.3	DEL	vav2_1
vav2_1_2	31	46	1.3	DEL	vav2_1
vav2_1_2	31	47	1.3	HET	vav2_1
vav2_1_2	31	48	1.3	HET	vav2_1
vav2_1_2	31	49	1.3	DEL	vav2_1
vav2_1_2	31	50	1.3	DEL	vav2_1
vav2_1_2	31	51	1.3	DEL	vav2_1
vav2_1_2	31	52	1.3	HET	vav2_1
vav2_1_2	31	53	1.3	DEL	vav2_1
vav2_1_2	31	54	1.3	DEL	vav2_1
vav2_1_2	31	55	1.2	DEL	vav2_1
vav2_1_2	31	56	1.3	HET	vav2_1
vav2_1_2	32	57	1.3	DEL	vav2_1
vav2_1_2	32	58	1.4	HET	vav2_1
vav2_1_2	32	59	1.3	HET	vav2_1
vav2_1_2	32	60	1.4	DEL	vav2_1
vav2_1_2	32	61	1.1	DEL	vav2_1
vav2_1_2	32	62	1.1	HET	vav2_1
vav2_1_2	32	63	1.1	HET	vav2_1
vav2_1_2	32	64	1.3	HET	vav2_1
vav2_1_2	32	65	1.2	HET	vav2_1
vav2_1_2	32	66	1.2	DEL	vav2_1
vav2_1_2	32	67	1	DEL	vav2_1
vav2_1_2	32	68	1.1	DEL	vav2_1
vav2_1_2	32	69	1.2	DEL	vav2_1
vav2_1_2	32	70	1.1	HET	vav2_1
vav2_1_2	32	71	1.1	HET	vav2_1
vav2_1_2	32	72	1.1	HET	vav2_1
vav2_1_2	32	73	1.1	HET	vav2_1
vav2_1_2	32	74	1.2	HET	vav2_1
vav2_1_2	32	75	1.1	HET	vav2_1
vav2_1_2	32	76	1.2	HET	vav2_1
vav2_1_2	32	77	1.2	DEL	vav2_1
vav2_1_2	32	78	1.3	HET	vav2_1
vav2_1_2	32	79	1.1	DEL	vav2_1
vav2_1_2	32	80	1.1	DEL	vav2_1
vav2_1_2	32	81	1.2	DEL	vav2_1
vav2_1_2	32	82	1.1	HET	vav2_1
vav2_1_2	32	83	1.1	DEL	vav2_1
vav2_1_2	32	84	1.1	HET	vav2_1
vav2_2_1	30	1	1.3	DEL	vav2_2
vav2_2_1	30	2	1.4	DEL	vav2_2
vav2_2_1	30	3	1.2	HET	vav2_2
vav2_2_1	30	4	1.3	DEL	vav2_2
vav2_2_1	30	5	1.2	DEL	vav2_2
vav2_2_1	30	6	1.3	HET	vav2_2
vav2_2_1	30	7	1.3	DEL	vav2_2
vav2_2_1	30	8	1.3	DEL	vav2_2
vav2_2_1	30	9	1.3	HET	vav2_2
vav2_2_1	30	10	1.3	HET	vav2_2
vav2_2_1	30	11	1.2	DEL	vav2_2
vav2_2_1	30	12	1.2	HET	vav2_2
vav2_2_1	30	13	1.35	DEL	vav2_2
vav2_2_1	30	14	1.3	HET	vav2_2
vav2_2_1	30	15	1.2	HET	vav2_2
vav2_2_1	30	16	1.1	HET	vav2_2
vav2_2_1	30	17	1.2	HET	vav2_2
vav2_2_1	30	18	1.2	DEL	vav2_2
vav2_2_1	30	19	1.2	HET	vav2_2
vav2_2_1	30	20	1.1	DEL	vav2_2
vav2_2_1	30	21	1.1	HET	vav2_2
vav2_2_1	30	22	1.2	HET	vav2_2
vav2_2_1	30	23	1.2	DEL	vav2_2
vav2_2_1	30	24	1.2	HET	vav2_2
vav2_2_1	30	25	1.3	DEL	vav2_2
vav2_2_1	30	26	1.3	HET	vav2_2
vav2_2_1	30	27	1.2	DEL	vav2_2
vav2_2_1	30	28	1.2	DEL	vav2_2
vav2_2_1	30	29	1.2	DEL	vav2_2
vav2_2_1	30	30	1.2	DEL	vav2_2
vav2_2_1	30	31	1.2	HET	vav2_2
vav2_2_1	30	32	1.3	HET	vav2_2
vav2_2_1	30	33	1.3	DEL	vav2_2
vav2_2_1	30	34	1.1	HET	vav2_2
vav2_2_1	30	35	1.3	HET	vav2_2
vav2_2_1	30	36	1.2	DEL	vav2_2
vav2_2_1	30	37	1.2	HET	vav2_2
vav2_2_1	30	38	1.2	HET	vav2_2
vav2_2_1	30	39	1.2	HET	vav2_2
vav2_2_1	30	40	1.2	HET	vav2_2
vav2_2_1	30	41	1.2	DEL	vav2_2
vav2_2_1	30	42	1.2	HET	vav2_2
vav2_2_1	30	43	1.3	HET	vav2_2
vav2_2_1	30	44	1.1	HET	vav2_2
vav2_2_1	30	45	1.2	HET	vav2_2
vav2_2_1	30	46	1.2	HET	vav2_2
vav2_2_1	30	47	1.2	HET	vav2_2
vav2_2_1	30	48	1.2	HET	vav2_2
vav2_2_1	30	49	1.1	HET	vav2_2
vav2_2_1	30	50	1.15	HET	vav2_2
vav2_2_1	30	51	1.1	HET	vav2_2
vav2_2_1	30	52	1.2	HET	vav2_2
vav2_2_1	30	53	1.1	DEL	vav2_2
vav2_2_1	30	54	1.25	HET	vav2_2
vav2_2_1	30	55	1.1	DEL	vav2_2
vav2_2_1	30	56	1.2	DEL	vav2_2
vav2_2_1	31	57	1.1	DEL	vav2_2
vav2_2_1	31	58	1.1	DEL	vav2_2
vav2_2_1	31	59	1.2	DEL	vav2_2
vav2_2_1	31	60	1.1	HET	vav2_2
vav2_2_1	31	61	1.1	HET	vav2_2
vav2_2_1	31	62	1.2	HET	vav2_2
vav2_2_1	31	63	1	DEL	vav2_2
vav2_2_1	31	64	1.1	HET	vav2_2
vav2_2_1	31	65	1	DEL	vav2_2
vav2_2_1	31	66	1	DEL	vav2_2
vav2_2_1	31	67	1.2	DEL	vav2_2
vav2_2_1	31	68	1.2	HET	vav2_2
vav2_2_1	31	69	1.1	HET	vav2_2
vav2_2_1	31	70	1.1	HET	vav2_2
vav2_2_1	31	71	1.1	DEL	vav2_2
vav2_2_1	31	72	1.1	HET	vav2_2
vav2_2_1	31	73	1	DEL	vav2_2
vav2_2_1	31	74	0.9	HET	vav2_2
vav2_2_1	31	75	1.1	DEL	vav2_2
vav2_2_1	31	76	1.1	DEL	vav2_2
vav2_2_1	31	77	1.1	HET	vav2_2
vav2_2_1	31	78	1.1	HET	vav2_2
vav2_2_1	31	79	1.1	DEL	vav2_2
vav2_2_1	31	80	1.1	DEL	vav2_2
vdac3_5_1	30	1	1.2	DEL	vdac3_5
vdac3_5_1	30	2	1.3	HET	vdac3_5
vdac3_5_1	30	3	1.3	DEL	vdac3_5
vdac3_5_1	30	4	1.3	DEL	vdac3_5
vdac3_5_1	30	5	1.3	HET	vdac3_5
vdac3_5_1	30	6	1.3	HET	vdac3_5
vdac3_5_1	30	7	1.2	DEL	vdac3_5
vdac3_5_1	30	8	1.3	HET	vdac3_5
vdac3_5_1	30	9	1.2	HET	vdac3_5
vdac3_5_1	30	10	1.3	DEL	vdac3_5
vdac3_5_1	30	11	1.3	HET	vdac3_5
vdac3_5_1	30	12	1.2	DEL	vdac3_5
vdac3_5_1	30	13	1.1	DEL	vdac3_5
vdac3_5_1	30	14	1.1	DEL	vdac3_5
vdac3_5_1	30	15	1.2	DEL	vdac3_5
vdac3_5_1	30	16	1.2	HET	vdac3_5
vdac3_5_1	30	17	1.1	DEL	vdac3_5
vdac3_5_1	30	18	1.1	HET	vdac3_5
vdac3_5_1	30	19	1.3	HET	vdac3_5
vdac3_5_1	30	20	1.2	HET	vdac3_5
vdac3_5_1	30	21	1.2	HET	vdac3_5
vdac3_5_1	30	22	1.2	DEL	vdac3_5
vdac3_5_1	30	23	1.2	HET	vdac3_5
vdac3_5_1	30	24	1.2	HET	vdac3_5
vdac3_5_1	30	25	1.2	HET	vdac3_5
vdac3_5_1	30	26	1.2	DEL	vdac3_5
vdac3_5_1	30	27	1.1	HET	vdac3_5
vdac3_5_1	30	28	1.1	DEL	vdac3_5
vdac3_5_1	30	29	1.2	DEL	vdac3_5
vdac3_5_1	30	30	1.1	HET	vdac3_5
vdac3_5_1	30	31	1.1	DEL	vdac3_5
vdac3_5_1	30	32	1	HET	vdac3_5
vdac3_5_1	30	33	1.2	HET	vdac3_5
vdac3_5_1	30	34	1.2	HET	vdac3_5
vdac3_5_1	30	35	1.1	HET	vdac3_5
vdac3_5_1	30	36	1.2	DEL	vdac3_5
vdac3_5_1	30	37	1.1	HET	vdac3_5
vdac3_5_1	30	38	1.1	HET	vdac3_5
vdac3_5_1	30	39	1	HET	vdac3_5
vdac3_5_1	30	40	1	HET	vdac3_5
vdac3_5_1	31	41	1.1	DEL	vdac3_5
vdac3_5_1	31	42	1.1	HET	vdac3_5
vdac3_5_1	31	43	1.1	HET	vdac3_5
vdac3_5_1	31	44	1.1	HET	vdac3_5
vdac3_5_1	31	45	1.1	DEL	vdac3_5
vdac3_5_1	31	46	1.1	HET	vdac3_5
vdac3_5_1	31	47	1.1	HET	vdac3_5
vdac3_5_1	31	48	1.1	DEL	vdac3_5
vdac3_5_1	31	49	1.1	DEL	vdac3_5
vdac3_5_1	31	50	1.1	DEL	vdac3_5
vdac3_5_1	31	51	1	DEL	vdac3_5
vdac3_5_1	31	52	1.1	DEL	vdac3_5
vdac3_5_1	31	53	0.9	HET	vdac3_5
vdac3_5_1	31	54	0.9	DEL	vdac3_5
vdac3_5_1	31	55	0.8	DEL	vdac3_5
vdac3_5_1	31	56	0.9	HET	vdac3_5
vdac3_5_2	30	1	1.3	HET	vdac3_5
vdac3_5_2	30	2	1.2	DEL	vdac3_5
vdac3_5_2	30	3	1.5	HET	vdac3_5
vdac3_5_2	30	4	1.5	HET	vdac3_5
vdac3_5_2	30	5	1.3	HET	vdac3_5
vdac3_5_2	30	6	1.3	DEL	vdac3_5
vdac3_5_2	30	7	1.3	DEL	vdac3_5
vdac3_5_2	30	8	1.4	DEL	vdac3_5
vdac3_5_2	30	9	1.4	HET	vdac3_5
vdac3_5_2	30	10	1.4	DEL	vdac3_5
vdac3_5_2	30	11	1.4	DEL	vdac3_5
vdac3_5_2	30	12	1.4	HET	vdac3_5
vdac3_5_2	30	13	1.4	DEL	vdac3_5
vdac3_5_2	30	14	1.4	DEL	vdac3_5
vdac3_5_2	30	15	1.3	DEL	vdac3_5
vdac3_5_2	30	16	1.2	DEL	vdac3_5
vdac3_5_2	30	17	1.3	DEL	vdac3_5
vdac3_5_2	30	18	1.3	HET	vdac3_5
vdac3_5_2	30	19	1.2	DEL	vdac3_5
vdac3_5_2	30	20	1.2	DEL	vdac3_5
vdac3_5_2	30	21	1.5	DEL	vdac3_5
vdac3_5_2	30	22	1.5	HET	vdac3_5
vdac3_5_2	30	23	1.2	HET	vdac3_5
vdac3_5_2	30	24	1.3	HET	vdac3_5
vdac3_5_2	30	25	1.3	DEL	vdac3_5
vdac3_5_2	30	26	1.2	HET	vdac3_5
vdac3_5_2	30	27	1.2	DEL	vdac3_5
vdac3_5_2	30	28	1.2	DEL	vdac3_5
vdac3_5_2	30	29	1.2	DEL	vdac3_5
vdac3_5_2	30	30	1.2	HET	vdac3_5
vdac3_5_2	30	31	1.2	HET	vdac3_5
vdac3_5_2	30	32	1.2	DEL	vdac3_5
vdac3_5_2	30	33	1.2	HET	vdac3_5
vdac3_5_2	30	34	1.3	DEL	vdac3_5
vdac3_5_2	30	35	1.2	DEL	vdac3_5
vdac3_5_2	30	36	1.2	DEL	vdac3_5
vdac3_5_2	30	37	1.2	HET	vdac3_5
vdac3_5_2	30	38	1.2	HET	vdac3_5
vdac3_5_2	30	39	1.1	DEL	vdac3_5
vdac3_5_2	30	40	1.1	DEL	vdac3_5
vdac3_5_2	30	41	1.1	HET	vdac3_5
vdac3_5_2	30	42	1.1	HET	vdac3_5
vdac3_5_2	30	43	0.9	HET	vdac3_5
vdac3_5_2	30	44	1	DEL	vdac3_5
vdac3_5_2	30	45	1	DEL	vdac3_5
vdac3_5_2	30	46	1	DEL	vdac3_5
vdac3_5_2	31	47	1.2	DEL	vdac3_5
vdac3_5_2	31	48	1.3	HET	vdac3_5
vdac3_5_2	31	49	1.3	DEL	vdac3_5
vdac3_5_2	31	50	1.3	HET	vdac3_5
vdac3_5_2	31	51	1.3	DEL	vdac3_5
vdac3_5_2	31	52	1.4	HET	vdac3_5
vdac3_5_2	31	53	1	HET	vdac3_5
vdac3_5_2	31	54	1	HET	vdac3_5
vdac3_5_2	31	55	1.3	DEL	vdac3_5
vdac3_5_2	31	56	1.4	DEL	vdac3_5
vdac3_5_2	31	57	1.3	HET	vdac3_5
vdac3_5_2	31	58	1.3	HET	vdac3_5
vdac3_5_2	31	59	1.3	DEL	vdac3_5
vdac3_5_2	31	60	1.2	DEL	vdac3_5
vdac3_5_2	31	61	1.1	HET	vdac3_5
vdac3_5_2	31	62	1.1	HET	vdac3_5
vdac3_5_2	31	63	1.3	DEL	vdac3_5
vdac3_5_2	31	64	1.3	DEL	vdac3_5
vdac3_5_2	31	65	1.1	HET	vdac3_5
vdac3_5_2	31	66	1.1	DEL	vdac3_5
vdac3_5_2	31	67	1.2	HET	vdac3_5
vdac3_5_2	31	68	1.2	DEL	vdac3_5
vdac3_5_2	31	69	1.2	DEL	vdac3_5
vdac3_5_2	31	70	1.1	DEL	vdac3_5
vdac3_5_2	31	71	1.2	DEL	vdac3_5
vdac3_5_2	31	72	1.2	HET	vdac3_5
vdac3_5_2	31	73	1.1	DEL	vdac3_5
vdac3_5_2	31	74	1.2	DEL	vdac3_5
vdac3_5_2	31	75	1.1	HET	vdac3_5
vdac3_5_2	31	76	1.1	DEL	vdac3_5
vdac3_5_2	31	77	1.1	DEL	vdac3_5
vdac3_5_2	31	78	1.1	HET	vdac3_5
vdac3_5_2	31	79	1.1	DEL	vdac3_5
vdac3_5_2	31	80	1.2	HET	vdac3_5
vdac3_5_2	31	81	1	HET	vdac3_5
vdac3_5_2	31	82	1	DEL	vdac3_5
vdac3_5_2	31	83	1.1	DEL	vdac3_5
vdac3_5_2	31	84	1	DEL	vdac3_5
vdac3_5_2	31	85	1.1	HET	vdac3_5
vdac3_5_2	31	86	1.1	DEL	vdac3_5
vdac3_5_2	31	87	1	HET	vdac3_5
vdac3_5_2	31	88	1	DEL	vdac3_5
vti1a_1_1	30	1	1.4	HET	vti1a_1
vti1a_1_1	30	2	1.4	DEL	vti1a_1
vti1a_1_1	30	3	1.4	DEL	vti1a_1
vti1a_1_1	30	4	1.3	HET	vti1a_1
vti1a_1_1	30	5	1.4	HET	vti1a_1
vti1a_1_1	30	6	1.4	DEL	vti1a_1
vti1a_1_1	30	7	1.5	HET	vti1a_1
vti1a_1_1	30	8	1.4	HET	vti1a_1
vti1a_1_1	30	9	1.3	HET	vti1a_1
vti1a_1_1	30	10	1.2	DEL	vti1a_1
vti1a_1_1	30	11	1.3	DEL	vti1a_1
vti1a_1_1	30	12	1.3	DEL	vti1a_1
vti1a_1_1	30	13	1.35	DEL	vti1a_1
vti1a_1_1	30	14	1.35	HET	vti1a_1
vti1a_1_1	30	15	1.25	HET	vti1a_1
vti1a_1_1	30	16	1.3	DEL	vti1a_1
vti1a_1_1	30	17	1.3	HET	vti1a_1
vti1a_1_1	30	18	1.3	DEL	vti1a_1
vti1a_1_1	30	19	1.25	HET	vti1a_1
vti1a_1_1	30	20	1.3	DEL	vti1a_1
vti1a_1_1	30	21	1.3	HET	vti1a_1
vti1a_1_1	30	22	1.3	DEL	vti1a_1
vti1a_1_1	30	23	1.3	DEL	vti1a_1
vti1a_1_1	30	24	1.3	HET	vti1a_1
vti1a_1_1	30	25	1.2	HET	vti1a_1
[truncated: 142 more rows]

## Sheet: 2F
Raw values displayed in the figure

## Sheet: 3F
Construct	Value
EVI5B_MIC− x DMSO	1.02187
EVI5B_MIC− x DMSO	1.01423
EVI5B_MIC− x DMSO	0.979816
EVI5B_MIC− x DMSO	0.988
EVI5B_MIC+ x DMSO	1.01536
EVI5B_MIC+ x DMSO	0.997835
EVI5B_MIC+ x DMSO	0.983662
EVI5B_MIC+ x DMSO	1.00314
EVI5B_MIC− x RAB11A	1.95302
EVI5B_MIC− x RAB11A	1.93416
EVI5B_MIC− x RAB11A	1.75012
EVI5B_MIC− x RAB11A	1.81394
EVI5B_MIC+ x RAB11A	1.91997
EVI5B_MIC+ x RAB11A	1.90889
EVI5B_MIC+ x RAB11A	1.83751
EVI5B_MIC+ x RAB11A	1.86429

## Sheet: 3H
Protein	SRF
pEGFP	0.0198
pEGFP	0.0196
pEGFP	0.4
pEGFP	0.2
pEGFP	0.152
pEGFP	0.6
VAV2_MIC-	0.1
VAV2_MIC-	0.182
VAV2_MIC-	0.678
VAV2_MIC-	0.974
VAV2_MIC-	0.7
VAV2_MIC-	1.1
VAV2_MIC+	2.97
VAV2_MIC+	2.08
VAV2_MIC+	2.88
VAV2_MIC+	2.81
VAV2_MIC+	3.2
VAV2_MIC+	2.2
VAV2_MIC+	2.01
VAV2_MIC+	5.38
VAV2_MIC+	3.4
VAV2_ONCO	5.26
VAV2_ONCO	5.58
VAV2_ONCO	6.84
VAV2_ONCO	8.81
VAV2_ONCO	7.95
VAV2_ONCO	6.2
VAV2_ONCO	13.6
VAV2_ONCO	8.82

[truncated: 5 more sheets: S1A, S1C, S1D, S3.1C, Figures 3-6 and associated supp]
